# Supplementary material for: Lipidomics analysis of juveniles’ blue mussels (Mytilus edulis L. 1758), a key economic and ecological species
Source: PLoS One. 2020 Feb 21;15(2):e0223031. doi: 10.1371/journal.pone.0223031 (PMC7034892; doi:10.1371/journal.pone.0223031)
Supplement: S1 Data — During data processing chromatograms were aligned to a QC samples, peak picking was done following automatic configuration of the software and inserting a threshold background noise of 1xE5 (POS) and 1xE4 (NEG). Samples are reported as normalised abundance. The reported PIT was furtherly processed via MetaboanalysR as reported in the main text of the paper. Compounds identifiers are found on Column A. Samples are found after column G. Accepted identification codes are given according Lipid Maps and HMDB codes. Lipid ID was provided from exact MS’ with Δppm <5 and relative adduct (as reported in S1 Table). (XLSX) [file pone.0223031.s013.xlsx]

## Sheet: SPAT_POS
							BQC1_P	BQC2_P	BQC3_P	TQ1_P	TQC2_P	TQC3_P	CYL1_P	CYL2_P	CYL3_P	NANNO1_P	NANNO2_P	NANNO3_P	ISO1_P	ISO2_P	ISO3_P	MONO1_P	MONO2_P	MONO3_P	SP1_P	SP2_P	SP3_P	T01_P	T02_P	T03_P	OUT1_P	OUT2_P	OUT3_P
Exact mass ID	Compound	Neutral mass (Da)	m/z	Retention time (min)	Maximum Abundance	Minimum CV%	QC	QC	QC	QC	QC	QC	CYL	CYL	CYL	NANNO	NANNO	NANNO	ISO	ISO	ISO	MONO	MONO	MONO	SP	SP	SP	T0	T0	T0	OUT	OUT	OUT	Accepted Compound ID	Exact mass ID	Adducts	Formula	Score	Fragmentation Score	Mass Error (ppm)	Isotope Similarity	Retention Time Error (mins)	Compound Link
CAEP(32:1)	8.36_617.5014m/z		617.501	8.36237	316585	4.88	128571	146922	140371	132687	145177	134649	249701	413342	286712	256318	242858	206695	201379	117409	166814	42726	33622.4	65923.1	128530	58607.5	78159.3	117840	119873	159128	229939	252611	300057		CAEP(32:1)	M+H	[C34H70N2O5P]+	54.8	0	-1.71019	96.5846	0.0089
CAEP(34:1)	9.27_644.5250n	644.525	645.532	9.26778	578976	2.43	215590	248195	238563	229447	240083	231281	374178	539587	446726	577408	598070	561450	178799	147963	190420	91566	75832.9	109476	216500	136731	177659	138177	145385	171613	329467	371385	418223		CAEP(34:1)	M+H, M+Na	[C36H74N2O5P]+	54.7	0	-2.55313	94.3188	0.0081
CAEP(34:2)a	8.61_642.5090n	642.509	643.516	8.60983	467271	3.94	182392	207243	208219	185066	200096	194600	276289	546188	353344	497354	489469	414990	117932	94203.2	145083	38731.7	29390.6	52585.7	167548	80311.9	114086	119102	126175	152312	308485	336372	377765		CAEP(34:2)a	M+H, M+Na	[C36H72N2O5P]+	54.2	0	-2.48665	94.1597	0.0088
CAEP(34:2)b	8.88_642.5099n	642.51	643.517	8.88483	971915	1.59	212691	255693	239542	261925	280186	268123	989721	963690	962336	164492	168904	138275	57788.4	44391.2	54935.1	128017	130911	191860	224655	149333	176812	253295	273238	331359	311513	351449	396665		CAEP(34:2)b	M+H, M+Na	[C36H72N2O5P]+	40.8	0	-1.04572	94.2244	0.2838
CAEP(34:3)	8.54_640.4941n	640.494	641.501	8.54113	1.01578e+06	4.86	217639	251625	239835	239827	261919	242480	119171	92815.5	78202.5	107117	125835	103209	1.14767e+06	874872	1.0248e+06	103011	110539	173815	357691	196694	223442	173677	192674	261973	283771	302163	346898	CAEP(34:3)	CAEP(34:3)	M+H, M+Na	[C36H70N2O5P]+	42.5	0	-0.488708	91.4343	-0.128867
CAEP(35:2)	9.19_656.5251n	656.525	657.532	9.18527	344999	2.76	109701	120431	119341	128845	136137	132147	447703	276517	310778	79557	74196	67086.1	26971.6	20274	25233.5	86217.9	78344.4	115460	164972	114086	123572	158346	165232	199083	179642	193662	226272		CAEP(35:2)	M+H, M+Na	[C37H74N2O5P]+	54.7	0	-2.55679	93.8472	0.00773333
CAEP(36:3)	9.12_669.5322m/z		669.532	9.11697	196376	1.24	82046.8	93648.3	90928.3	102164	104209	104526	58449.2	43308.4	46140.5	47860	51934.8	50689.9	76425.5	52589.6	73086.2	94521.3	100457	133311	160730	124763	120396	156840	158351	178067	173683	184443	231003		CAEP(36:3)	M+H	[C38H74N2O5P]+	55.5	0	-2.32594	93.7713	-0.00593333
Cer(34:1)	10.10_537.5115n	537.512	520.508	10.1003	287985	1.34	152406	181109	169713	136535	138077	134442	163596	184997	151129	178022	160685	132685	292111	261587	310258	52815.3	42129.9	72520.4	107519	87771.7	87814.6	147623	123049	159956	207098	213694	293370	HMDB04949	Cer(34:1)	M+H-H2O, M+H, M+Na	C34H67NO3	48	0	-2.47496	91.6655	-0.0395
Cer(34:2)a	9.45_535.4956n	535.496	518.492	9.44557	119251	2.24	63531.4	71025.6	70451	52147.8	50357.3	50037.9	83696.6	142605	107624	130791	111518	100098	13192.3	15103.5	26807.7	7703.77	4965.7	7384.36	24441.1	14933.9	18924.7	46153.3	40673.7	37071.1	111786	104724	141242	LMSP02010024	Cer(34:2)a	M+H-H2O, M+H	C34H65NO3	48	0	-2.70956	89.9886	-0.03415
Cer(34:2)b	9.72_535.4960n	535.496	518.493	9.71757	269080	1.91	77343.4	92288.7	88910.3	84617.5	85438.9	87778.1	337253	243045	226943	37828.7	35281.8	26458.9	30996.4	31340.4	27614.6	36958.4	35671.3	63628.5	65514.9	47139.6	46551.8	119582	109522	141555	99620.7	108123	157991	LMSP02010024	Cer(34:2)b	M+H-H2O, M+H, M+Na	C34H65NO3	50.5	0	-1.99284	91.9389	-0.0234
Cer(34:3)	9.34_533.4803n	533.48	534.488	9.33652	186912	2.14	46026.8	53209	49088.6	42638.9	42290.7	40941.9	16534.7	10707.6	10185.6	11209.2	10632.4	9473.82	205917	167826	186992	10074.7	10369.6	17793.9	42555.4	25694.5	24318.9	39713.8	36100.1	43183.3	47546.5	51162.9	77604.4	LMSP02010055	Cer(34:3)	M+H-H2O, M+H	C34H63NO3	50.9	0	-2.30216	91.1083	-0.0194167
Cer(35:2)	10.02_549.5108n	549.511	532.508	10.0184	132761	1.78	53566.3	62821.3	58158.4	55448.9	56501.7	54524	213940	87435.3	96906.5	20777.8	18444	15048.2	23870	22422.9	17151.7	29664.8	23981	42390.7	55344.6	39357	39254	82928.6	76893.4	92339.3	83333.9	79842.6	115031	LMSP02010060	Cer(35:2)	M+H-H2O, M+H	C35H67NO3	49.4	0	-3.75789	89.2792	-0.0251
Chlorophyll c	4.98_589.2439m/z		589.244	4.97962	351100	2.08	68208.5	90598.3	83213.3	83603.5	85516.3	82039	497854	206732	348714	31098.6	30354.3	21584.8	398758	108746	200816	34261.6	15238.1	35151.7	44958.5	18203.2	10193.5	10298.9	9169.48	11227.1	11633.7	15056	22696.6	HMDB31147	Chlorophyll c	M+H	C35H32N4O5	38.8	0	-1.15832	95.3959		http://nonlinear.com/redirect/outbound?p=hmdb&param=HMDB31147
Cholesteryl acetate	7.66_429.3724m/z		429.372	7.66107	125853	4.07	43388.4	46128.8	41634	40710.1	39550	36596.3	114585	95483.6	108682	138690	121862	117007	24882.8	22856.6	28830.3	18798.6	19738.9	27923.8	23020.5	18398.7	13538.6	17806.5	16625.9	17898	23093.3	24377	28455.8	HMDB03822	Cholesteryl acetate	M+H	C29H48O2	38.7	0	-0.651427	94.4268		http://nonlinear.com/redirect/outbound?p=hmdb&param=HMDB03822
CL(88:24)	14.20_1658.9997m/z		1659	14.2006	328892	3.56	120272	137193	133688	164022	154741	153939	74945.1	106815	86135.7	37185.9	43436.9	46835.3	186985	116371	119017	81993.6	88756.4	110914	84490.3	70337.4	68535.1	325592	311453	349632	240996	243683	181401	HMDB59569	CL(88:24)	M+NH4	C97H142O17P2	48.4	0	-4.46824	94.3533	-0.0515
PE-Cer(32:1)	9.20_509.4804n	509.48	492.477	9.19903	144343	2	68183.6	79019.7	72899.1	60591.2	61678	59257.3	75582.1	102821	89679.9	61514.1	55110.1	44236.3	142029	120914	124403	10307.8	8404.22	15308	28994.1	20376.5	22146.5	75770.1	59951.5	70989.7	118413	130531	184085	HMDB11773	CPE(32:1)	M+H-H2O, M+H, M+Na	C32H63NO3	48.5	0	-2.32545	92.2309	-0.03325
PE-Cer(33:0)	8.54_670.5045n	670.505	671.512	8.54113	610912	4.29	191624	231712	220921	250113	271475	253341	152447	109640	98953.4	124509	131492	115609	623141	580815	628778	206387	211970	293918	425256	282767	294267	236682	269150	329557	251828	246841	287937		CPE(33:0)	M+H, M+Na	[C37H72N2O6P]+	54.6	0	-2.35176	96.2712	0.00886667
PE-Cer(36:3)	8.84_685.5274m/z		685.527	8.84362	94334.8	2.86	38886.5	49565	44476.5	58896.1	62167.2	61562.7	31574.7	20185	19945.4	21318.1	22650.3	22157.5	53187.3	38676.4	45781.5	73499.2	71943.7	97272.6	112195	88942.9	81867	80503.3	85346.6	92779.5	61258.9	61978.6	75952.9	LMSP03020035	CPE(36:3)	M+H	C38H73N2O6P	54.2	0	-0.656609	94.0284	-0.0103167
Desmosterol	8.11_385.3463m/z		385.346	8.11487	80250.8	5.16	22330.9	23508.4	20972.1	27940.5	26680.1	25196.4	105915	8937.07	6551.46	77537.3	67661.5	95553.7	684.684	1285.68	1205.63	30606	39133.5	66539.4	24930.4	17605.9	7500.85	3209.9	2397.96	3138.1	1508.05	1076.64	1843.24	LMST01010016	Desmosterol	M+H	C27H44O	40.5	0	-0.645083	95.8598	0.3856
DG(32:1)	10.81_589.4799m/z		589.48	10.8123	50748	2.21	18275.7	18706.6	21110.5	14777	17352.4	19371.7	38148.3	35615.9	30604.3	58492.4	42980.6	50771.1	34582.2	44026.8	54291.9	547.939	607.204	755.28	3720.18	1305.86	1433.59	14237.8	14571.3	20797.1	18370.5	17730.1	17649	HMDB07014	DG(32:1)	M+Na	C35H66O5	44.6	0	-0.72406	91.5487	-0.0937
GlcCer(38:3)	8.86_774.5876m/z		774.588	8.85737	226658	1.53	26459.3	25668.6	26149.8	21378	22457.2	21849.1	8589.33	12355.7	7767.92	1832.65	3060.32	1201.74	237987	153343	288644	2071.37	1181.83	2243.51	2081.19	1806.39	776.867	5782.78	6217.38	5666.77	13582.8	15855	17578.1	LMSP0501AA35	GlcCer(38:3)	M+Na	C44H81NO8	36.8	0	2.84422	87.463		http://nonlinear.com/redirect/outbound?p=lipidmaps&param=LMSP0501AA35
LPC(16:0)	4.80_495.3317n	495.332	496.339	4.80087	2.77802e+06	2.74	1.10069e+06	1.33481e+06	1.26408e+06	1.0123e+06	1.06774e+06	1.02962e+06	1.58881e+06	1.41595e+06	1.32484e+06	1.03062e+06	1.12825e+06	925023	1.63627e+06	1.72078e+06	1.54945e+06	194187	215246	365230	738585	365885	325612	850057	965797	1.02334e+06	2.5028e+06	2.76556e+06	3.0657e+06	HMDB10382	LysoPC(16:0)	M+H, M+Na	C24H50NO7P	38.7	0	-1.567	95.4106		http://nonlinear.com/redirect/outbound?p=hmdb&param=HMDB10382
LPC(17:0)	5.05_510.3550m/z		510.355	5.04837	149343	1.52	80115.8	94498.9	86176.7	80287.3	81569.9	79127.2	216124	103813	128091	35173.6	39110.7	31063.2	102878	88131.2	83884	48213	46789.5	80421.9	132353	75860.5	70968.7	60240.3	68622.4	68312.6	106233	110783	128134	PC(17:0)	LysoPC(17:0)	M+H	[C25H53NO7P]+	41.3	0	-1.4825	94.4139	-0.131633
LPC(18:0)	5.43_524.3708m/z		524.371	5.43342	400309	1.77	180540	215625	203528	167564	167555	162474	384586	387910	359527	91936.1	104689	88132.2	182887	189439	189067	64824.6	71629.3	126111	133840	76110.8	68656	107720	122542	121735	369215	375254	456458	HMDB10384	LysoPC(18:0)	M+H	C26H54NO7P	38.8	0	-0.535641	94.6264		http://nonlinear.com/redirect/outbound?p=hmdb&param=HMDB10384
LPC(18:1)	4.94_522.3549m/z		522.355	4.93837	586458	1.76	315432	376013	339437	289638	299470	291776	481123	388115	398553	366441	368429	307270	615479	611264	532629	78100.3	79449.5	147762	390467	200506	223972	210509	240059	226303	452102	470026	549003	LMGP01050029	LysoPC(18:1)	M+H	C26H52NO7P	44.3	0	-0.82611	94.842	-0.0539
LPC(20:1)	5.56_550.3862m/z		550.386	5.55717	373158	0.95	159722	184431	170667	146677	147851	145067	191395	168402	150543	136153	147029	113857	374655	354977	389841	43233.7	44380.9	77959	184861	90775.9	97972.1	91300.2	102612	110502	251171	239008	282532	HMDB10391	LysoPC(20:1)	M+H	C28H56NO7P	38.5	0	-0.981696	93.9083		http://nonlinear.com/redirect/outbound?p=hmdb&param=HMDB10391
LPC(20:2)	5.16_548.3707m/z		548.371	5.15838	152797	1.55	55137.4	63135.8	58302.9	46882.5	46152	45451.9	28816.6	23346.3	21522.7	25709.1	25352.9	19848.9	173089	133294	152007	13562.3	10973	17457	47093.8	25945.9	27370	31349	35244.2	36707.3	114295	122304	147334	LMGP01050132	LysoPC(20:2)	M+H	C28H54NO7P	43.4	0	-2.0534	92.9971	-0.0594333
LPC(20:4)	4.42_544.3393m/z		544.339	4.41583	256146	1.55	42609.1	47500.2	43444.4	54133.3	55818.7	54783.7	333950	217450	217037	132148	111433	84111.1	19129.1	10818.4	14429.6	26531.3	23254.6	28142.1	41850.9	38267.7	33582.6	17973.2	17490.3	21721.6	7726.66	6083.15	8979.14	LMGP01050048	LysoPC(20:4)	M+H	C28H50NO7P	45.6	0	-1.75951	93.5539	-0.0318167
LPC(20:5)a	4.00_542.3236m/z		542.324	4.00332	240258	1.79	55962.9	60414.2	56989.1	67056	69468.6	68648.9	91624.2	79225.1	64048.2	157667	122942	95579.3	24985.2	13337.2	19336.4	33705.6	26384.1	32810	36280.3	26850.7	26544.4	226631	226816	267328	79946.4	60937.7	88156.8	HMDB10397	LysoPC(20:5)a	M+H	C28H48NO7P	38.5	0	-1.01383	93.5742		http://nonlinear.com/redirect/outbound?p=hmdb&param=HMDB10397
LPC(20:5)b	4.14_494.3237m/z		494.324	4.14082	141994	1.25	74218.5	84838.4	81850.3	66820.5	68504.6	67855.3	162016	131884	132081	95472.4	86883.4	80019.2	66463.7	72194.7	78841.8	18382.9	17365.2	27732.7	58295.2	33648.7	32701.2	101732	121829	111647	108161	106732	118438	LMGP01050021	LysoPC(20:5)b	M+H	C24H48NO7P	38.7	0	-0.835944	94.4283		http://nonlinear.com/redirect/outbound?p=lipidmaps&param=LMGP01050021
LPC(22:6)	4.50_568.3393m/z		568.339	4.49833	328124	0.4	143345	152895	140275	133264	134237	133383	99187.2	53124.5	44247.6	43459.4	39945.8	29919.1	333683	214856	324361	82413.7	72625.5	83384.9	133180	101672	95032.1	317624	306647	360101	175286	153404	194749	LMGP01050056	LysoPC(22:6)	M+H	C30H50NO7P	43.4	0	-0.780052	93.4756	0.0553333
LPC(O-16:0)	5.08_482.3602m/z		482.36	5.07588	469855	0.91	137117	159489	147836	109188	111016	109400	75532.7	87201.1	74321.8	108121	103261	83223	79203.4	41707.5	44158.1	46605.4	52129.7	76479.3	87997.7	51994.2	54564.2	69270	70939.2	77884.4	421799	507017	480749	LMGP01060010	LysoPC(O-16:0)	M+H	C24H52NO6P	43.6	0	-0.860998	95.283	-0.0676667
MG(20:5)	4.87_376.2612n	376.261	377.268	4.86962	50561.7	2.66	17315.4	22529.7	19087.2	19440.9	20417.1	19586.5	31280.6	20456	18780	40336.8	36557.2	33534.8	8222.77	4695.13	4267.56	1036.23	840.602	1792.59	8614.87	3178.22	3125.69	45026.6	49126.3	57532.2	34353.7	41227	66995.4	HMDB11550	MG(20:5)	M+H, M+Na	C23H36O4	47.5	0	-0.602178	95.2051	-0.0263667
Mytiloxanthin	4.72_599.4089m/z		599.409	4.71835	121223	1.29	29679.8	42816.6	33190.7	38980	39809.3	39915.6	122459	40965.6	73586.6	25199.5	13814.2	12704.1	177967	94659.1	91043.1	26761	15899.2	21885.7	50627.8	17440.3	12159.9	78899.3	75349.6	70577	47163.4	41818.5	71002.6	Mytiloxanthin	Mytiloxanthin	M+H	C40H54O4	34.7	0	-1.00189	74.6759
PC(28:0)	8.24_678.5064m/z		678.506	8.23862	338099	2.51	52368.1	51537	49839.6	51717.4	53840.8	49854.1	37265.3	35900.7	33370	8400.46	9345.68	7650.22	448397	256633	309268	7071.51	6110.11	9575.15	33864.7	15861.9	12732.3	54657.4	65385.8	81838.7	25401	25809.4	29602.5	LMGP01011263	PC(28:0)	M+H	C36H72NO8P	45	0	-2.63585	96.515	-0.0736
PC(30:0)	9.12_706.5374m/z		706.537	9.11697	1.58855e+06	2.17	449170	431139	434877	408025	428030	421138	430436	454914	455811	246299	264719	218492	1.99287e+06	1.2282e+06	1.54458e+06	115832	106279	156916	319549	196823	181030	477065	553919	625935	492686	483311	591304	LMGP01010995	PC(30:0)	M+H	C38H76NO8P	43.7	0	-2.03472	96.2824	-0.115317
PC(30:1)	8.43_704.5220m/z		704.522	8.43112	251165	1.74	91476.5	94112.6	91214.9	110395	115227	108687	164613	213383	191251	59241.6	62803.2	52457.3	296518	197949	259029	34260.4	31318.9	54186.7	116201	52235.3	64482	202461	244376	279395	82700.4	81064.1	97349.7	LMGP01010485	PC(30:1)	M+H	C38H74NO8P	42.4	0	-0.779675	90.6072	-0.1227
PC(31:0)	9.57_720.5529m/z		720.553	9.56762	321957	0.46	138474	137711	137211	149239	154943	154765	172033	147272	163847	83654.6	101260	73719.5	382225	262753	320893	115022	105587	150308	283162	189448	188448	121970	152008	156903	132637	117814	138469	LMGP01011346	PC(31:0)	M+H	C39H78NO8P	43.9	0	-1.1267	93.4908	-0.10465
PC(31:1)	8.87_718.5376m/z		718.538	8.87108	150843	2	64019.8	72828.7	67848.9	96091.4	98590.8	94617.8	113777	109545	112949	47465.6	53457.5	44010.1	152948	96641.7	128714	79538.8	73121.9	114963	200928	109287	142314	95132.3	116123	132538	54737.1	59267.3	68073.5	LMGP01011464	PC(31:1)	M+H	C39H76NO8P	42.3	0	-1.3007	89.4488	-0.1183
PC(32:0)	10.00_734.5686m/z		734.569	10.0049	798763	1.42	452762	457686	441148	434530	445147	434241	549874	624777	617401	688765	783004	640275	969270	632003	795015	195060	173649	256121	458890	301829	296433	285182	352221	386058	672434	598793	763822	LMGP01011267	PC(32:0)	M+H	C40H80NO8P	43.3	0	-2.21495	95.6119	-0.1349
PC(32:1)	9.31_732.5531m/z		732.553	9.30903	2.2256e+06	1.28	962167	1.00319e+06	973092	1.11228e+06	1.12554e+06	1.09705e+06	1.88103e+06	2.48234e+06	2.31343e+06	1.89845e+06	1.90013e+06	1.77125e+06	1.49288e+06	1.19321e+06	1.50975e+06	420531	385585	619369	1.16299e+06	611799	760875	1.27463e+06	1.52381e+06	1.66381e+06	1.02699e+06	1.04417e+06	1.23575e+06	HMDB08032	PC(32:1)	M+H	C40H78NO8P	43.3	0	-0.644884	97.1157	-0.1531
PC(32:2)	8.71_730.5378m/z		730.538	8.7061	776561	2.38	229580	241133	231634	262297	273003	261812	365989	556713	472696	216300	216972	191404	892537	616214	820933	92030.1	81192.6	134554	293011	137589	173230	304013	378506	393685	182715	185545	214392	LMGP01011414	PC(32:2)	M+H	C40H76NO8P	51.9	0	-2.27254	96.5234	-0.0187167
PC(32:3)	8.17_728.5220m/z		728.522	8.16985	674341	0.59	95543.1	95593.2	94596.4	90335.9	91839	86394.6	134449	169861	155104	8524.62	9509.88	6688.85	778077	549602	695342	20224.5	13166.9	24231.6	40670.6	20065.9	19910.7	53787.7	67681.7	74004.2	48028.8	44305.9	53663.2	LMGP01011369	PC(32:3)	M+H	C40H74NO8P	44.2	0	-2.31065	95.7431	-0.0873333
PC(32:4)	7.78_726.5062m/z		726.506	7.78483	565902	1.47	84136.3	84076.3	80470.8	70072.1	68811.6	68063.2	13865	22611.3	24259.5	1477.23	1222.13	1128.46	587244	502284	608177	5599.71	3663.85	5002.74	12936.6	8993.36	6176.57	71271.1	80435.6	79337	91223.2	73670.2	96863	LMGP01010568	PC(32:4)	M+H	C40H72NO8P	44	0	-2.37329	96.1419	-0.0872833
PC(33:0)	9.24_748.5843m/z		748.584	9.24028	165198	1.81	44218.5	47892.8	45975.7	46199.2	47625.9	46123	18415.7	16460.2	15770.6	20390.3	24286.9	21432	3031	3982.26	4966.53	28859.6	28879.9	42312.3	37937	23238.3	27788.4	85295.3	90966.3	105526	132633	181917	181043	LMGP01011583	PC(33:0)	M+H	C41H82NO8P	38.5	0	-1.03807	93.7721		http://nonlinear.com/redirect/outbound?p=lipidmaps&param=LMGP01011583
PC(33:1)	9.76_746.5688m/z		746.569	9.75877	361671	0.86	158593	159462	156785	215142	211238	210563	303398	226442	283133	181090	189216	164586	302354	227798	265245	209952	185914	266526	473549	274191	337272	137919	170006	186311	98938.3	99774.1	114760	LMGP01011806	PC(33:1)	M+H	C41H80NO8P	38.4	0	-0.900085	93.1197		http://nonlinear.com/redirect/outbound?p=lipidmaps&param=LMGP01011806
PC(33:2)	9.16_744.5530m/z		744.553	9.15792	196810	2.08	70158.4	69374.3	67375.1	83071.8	85705.2	82373.6	72358.1	56912.9	66980.9	62551.4	65621.6	55064	221847	159960	208623	65065.2	60058.8	81154.5	189270	114632	129915	57084.6	66471.5	68442	46962.1	49588.4	52485	LMGP01011836	PC(33:2)	M+H	C41H78NO8P	37.5	0	-0.985666	88.5397		http://nonlinear.com/redirect/outbound?p=lipidmaps&param=LMGP01011836
PC(34:1)	10.20_760.5836m/z		760.584	10.1961	2.55352e+06	0.29	943725	944931	939653	961589	984989	949962	960201	1.05018e+06	994559	2.65315e+06	2.60988e+06	2.39754e+06	2.25421e+06	1.94687e+06	2.24507e+06	406004	416437	605009	1.2838e+06	717085	774758	389099	467421	492319	681979	706455	821078	LMGP01010579	PC(34:1)	M+H	C42H82NO8P	38.6	0	-1.98335	95.2504		http://nonlinear.com/redirect/outbound?p=lipidmaps&param=LMGP01010579
PC(34:3)	9.02_756.5530m/z		756.553	9.02172	3.26948e+06	1.41	844896	831379	821461	730485	753555	731923	850159	845766	784399	254731	279928	220791	3.40643e+06	2.73543e+06	3.66659e+06	160514	124962	193812	545501	311582	322460	549877	648782	639899	1.04658e+06	1.06168e+06	1.205e+06	LMGP01012192	PC(34:3)	M+H	C42H78NO8P	43.2	0	-0.594572	96.2752	-0.14375
PC(34:4)	8.64_754.5371m/z		754.537	8.63733	4.45966e+06	0.71	987790	989903	976946	905167	929281	892612	790414	870810	751279	146473	144699	122301	4.58619e+06	3.87221e+06	4.92059e+06	110767	87003.2	138670	330172	194177	198973	884068	1.04081e+06	1.15746e+06	1.94006e+06	1.78828e+06	2.3109e+06	LMGP01010506	PC(34:4)	M+H	C42H76NO8P	43.5	0	-2.72131	96.7892	-0.115
PC(34:5)	8.17_752.5218m/z		752.522	8.16985	912740	1.24	240092	234758	239589	278556	283875	272347	298491	355898	298492	204019	174373	171309	570689	426302	478891	79751	63301.4	90581.7	172684	103840	99703	829208	860007	1.049e+06	350993	298463	390349	HMDB08460	PC(34:5)	M+H	C42H74NO8P	42.6	0	-4.00017	90.0219	-0.0873333
PC(35:2)	8.95_772.5848m/z		772.585	8.95358	116616	2.18	28698.6	28889.9	27733.7	23494.6	25091.3	23328	4544.52	3131.79	2381.77	8659.67	8475.31	6483.6	7126.89	7483.61	7560.24	9251.78	9906.23	13301	18740.4	11166.2	12128.2	33073.3	34293.8	38605.4	95210.5	119638	134998	LMGP01011487	PC(35:2)	M+H	C43H82NO8P	41.3	0	-0.31283	86.4114	-0.1446
PC(35:3)	9.46_770.5690m/z		770.569	9.45912	273505	0.67	77969	75554.9	76276.8	80563.7	81106.2	80034.1	80426.6	55270.2	65488.7	58705.6	60255.9	53965.4	290720	225076	304718	49566.4	38092.4	57490.6	124677	84216.6	88756.3	50020.6	58320.8	60158.4	66243.8	66188.1	77276.2	HMDB07947	PC(35:3)	M+H	C43H80NO8P	37.7	0	-0.620251	89.4889		http://nonlinear.com/redirect/outbound?p=hmdb&param=HMDB07947
PC(35:4)	9.13_768.5531m/z		768.553	9.1306	397579	0.51	138776	137827	137403	168263	176223	168755	448390	368607	375742	132324	129737	112370	336445	250092	319081	119956	103635	146251	236671	196620	208038	120468	131931	148889	111361	102524	134135	LMGP01012067	PC(35:4)	M+H	C43H78NO8P	38.5	0	-0.872879	93.6443		http://nonlinear.com/redirect/outbound?p=lipidmaps&param=LMGP01012067
PC(35:5)	8.60_766.5376m/z		766.538	8.59612	405854	2.18	179231	186483	185808	244516	262029	245906	264732	260967	202940	261890	264408	225996	338685	244973	277600	167252	143862	232836	351745	206649	254601	352411	376082	489069	218001	205837	261115	HMDB08494	PC(35:5)	M+H	C43H76NO8P	44	0	-3.7986	95.6807	-0.0874333
PC(36:1)	11.00_788.6159m/z		788.616	11.0048	590579	2.35	226728	240819	229058	258173	264711	252586	383472	365293	309184	372385	369974	336910	657028	503869	610839	118701	115612	193028	340678	176921	215419	177069	201714	234597	246650	247942	296034	LMGP01011376	PC(36:1)	M+H	C44H86NO8P	42.7	0	-0.60768	95.6073	-0.1997
PC(36:3)	9.75_784.5844m/z		784.584	9.74502	1.51127e+06	1.38	405961	417662	407432	416711	424020	412667	460359	547972	459614	357607	371643	341917	1.70565e+06	1.22396e+06	1.60419e+06	154327	135322	189357	600772	373578	417905	217019	259089	268125	403021	392396	455004	LMGP01010624	PC(36:3)	M+H	C44H82NO8P	39.6	0	-2.71002	88.2925	-0.270983
PC(36:4)	9.58_781.5606n	781.561	782.568	9.58112	1.04135e+07	1.09	2.17874e+06	2.22549e+06	2.25863e+06	2.49247e+06	2.54581e+06	2.53141e+06	9.32719e+06	1.10596e+07	1.08538e+07	5.04734e+06	4.80643e+06	4.33536e+06	1.82514e+06	1.61276e+06	1.92569e+06	902563	906830	1.17689e+06	1.82791e+06	1.57526e+06	1.5564e+06	711981	766498	837138	664012	529347	715225	HMDB08042	PC(36:4)	M+H, M+Na	C44H80NO8P	43.7	0	-1.24944	97.422	-0.1369
PC(36:5)	9.02_779.5444n	779.544	780.552	9.02172	1.43051e+07	1.15	5.63518e+06	5.50975e+06	5.5494e+06	5.8589e+06	6.19164e+06	6.05485e+06	8.08593e+06	1.02566e+07	8.58763e+06	1.26644e+07	1.17677e+07	1.1195e+07	5.65435e+06	4.53999e+06	5.08232e+06	2.08216e+06	1.83951e+06	2.59481e+06	3.61573e+06	2.35523e+06	2.51144e+06	1.35099e+07	1.38273e+07	1.5578e+07	9.53798e+06	8.46116e+06	1.09204e+07	HMDB08656	PC(36:5)	M+H, M+Na, 2M+H	C44H78NO8P	43.5	0	-4.53945	98.174	-0.114833
PC(36:6)	8.33_778.5369m/z		778.537	8.33487	807766	2.19	231745	236538	242127	306542	318255	293426	440709	669969	521829	567234	499921	486040	373449	278247	312800	120997	83569.4	138762	212119	107486	133626	704487	759342	959469	269645	233002	292435	HMDB08722	PC(36:6)	M+H	C44H76NO8P	42.3	0	-1.12593	88.9055	-0.109267
PC(37:2)	10.85_800.6158m/z		800.616	10.8535	134096	1.95	44859	47756.1	45321.3	62934.9	62924.8	60825.8	54628.8	32922.4	34395.5	34432.1	35664.6	31912.7	153561	107203	141524	61105.8	52578.7	77744.9	149639	88014.4	112932	29407.2	34638.1	43703.8	33394.8	36312.3	40749.8	LMGP01011793	PC(37:2)	M+H	C45H86NO8P	41.9	0	-1.93041	87.3484	-0.139
PC(37:4)	8.94_796.5838m/z		796.584	8.93983	197156	3.3	72476.5	79017.7	74791.1	84194.2	90666.7	85527	49289.9	49460	42959.7	66199.5	71647.9	64326.3	12194.7	12549.2	11747.3	85213.2	88426.7	135408	83454.8	51198.7	62930.1	141874	155468	176791	178117	189945	223405	HMDB07955	PC(37:4)	M+H	C45H82NO8P	42.6	0	-0.23165	92.8261	-0.14485
PC(37:6)	9.01_792.5513m/z		792.551	9.00818	1.09094e+06	2.02	362391	361011	349220	437719	456665	448057	318938	225420	221636	115116	114300	105704	1.2992e+06	906314	1.06731e+06	359425	312126	452101	681293	493390	539564	569947	614530	717276	402789	363969	434932	HMDB07958	PC(37:6)	M+H	C45H78NO8P	42.1	0	-3.87764	88.0339	-0.10105
PC(38:2)	11.25_814.6305m/z		814.63	11.2523	975384	1.05	285324	290251	284785	324669	324336	313687	301559	290131	248254	267885	282812	261948	1.03441e+06	867646	1.0241e+06	184000	163449	256269	472943	264747	349030	195542	243015	288570	339537	352992	393718	HMDB08045	PC(38:2)	M+H	C46H88NO8P	42.3	0	-0.794264	93.4455	-0.198
PC(38:3)	10.67_812.6157m/z		812.616	10.6748	972091	1.58	255197	252924	247452	269454	267555	261391	180833	207881	162872	202856	208010	193827	988371	821694	1.10621e+06	133679	117086	169317	399933	239214	295613	146294	180446	199670	263954	269222	303342	HMDB08271	PC(38:3)	M+H	C46H86NO8P	37.4	0	-0.882956	88.1224		http://nonlinear.com/redirect/outbound?p=hmdb&param=HMDB08271
PC(38:4)	10.44_810.5992m/z		810.599	10.4421	3.11687e+06	1.9	422827	470940	455703	551269	559051	538388	2.7712e+06	3.44878e+06	3.13063e+06	609258	576898	594858	254589	134884	169928	264716	247120	315734	315900	315807	255469	97452.2	92338.8	105825	76778.5	64348	85685.6	LMGP01012072	PC(38:4)	M+H	C46H84NO8P	38.6	0	-1.92159	95.3862		http://nonlinear.com/redirect/outbound?p=lipidmaps&param=LMGP01012072
PC(38:5)a	9.69_807.5765n	807.577	808.584	9.69017	3.8503e+06	2.13	984325	1.01776e+06	1.04221e+06	1.21797e+06	1.2035e+06	1.25412e+06	3.31601e+06	4.23254e+06	4.00236e+06	1.80407e+06	1.72648e+06	1.63328e+06	1.16977e+06	993731	1.20303e+06	621563	573755	760466	1.16311e+06	930820	1.03465e+06	937213	1.05674e+06	1.23176e+06	791398	721418	901177	HMDB08692	PC(38:5)a	M+H, M+Na	C46H82NO8P	44	0	-0.290366	97.3612	-0.135567
PC(38:5)b	9.90_808.5834m/z		808.583	9.89627	3.16483e+06	1.7	1.38122e+06	1.41405e+06	1.3684e+06	1.48576e+06	1.53803e+06	1.46183e+06	2.31498e+06	3.03564e+06	2.56892e+06	1.10563e+06	1.11049e+06	1.0183e+06	3.48273e+06	2.68072e+06	3.33105e+06	767845	693127	929658	1.64014e+06	1.18113e+06	1.1766e+06	1.61345e+06	1.70388e+06	1.87426e+06	1.6729e+06	1.40986e+06	1.97132e+06	HMDB08692	PC(38:5)b	M+H	C46H82NO8P	46.2	0	-0.781732	95.7753	0.0705333
PC(38:6)	9.45_805.5604n	805.56	806.568	9.44557	1.89089e+07	1.01	6.20072e+06	6.07909e+06	6.11856e+06	6.01024e+06	6.26941e+06	6.10079e+06	2.85187e+06	2.8131e+06	2.48904e+06	1.48953e+06	1.65265e+06	1.48205e+06	1.95542e+07	1.68073e+07	2.03651e+07	2.94719e+06	2.86413e+06	3.62417e+06	5.38142e+06	4.11206e+06	4.13102e+06	9.84674e+06	1.12169e+07	1.19186e+07	1.1414e+07	9.66815e+06	1.202e+07	LMGP01012140	PC(38:6)	M+H, M+Na, 2M+H	C46H80NO8P	43.9	0	-0.985306	98.6439	-0.137867
PC(38:7)	8.73_804.5526m/z		804.553	8.7336	1.34199e+06	2.32	419221	427610	408215	523452	547148	522283	315984	416975	328203	196903	203672	181915	1.2092e+06	866004	1.02319e+06	260791	200379	312870	595105	371076	439159	1.18225e+06	1.29962e+06	1.5441e+06	718864	634187	782357	LMGP01011663	PC(38:7)	M+H	C46H78NO8P	42.2	0	-2.87505	88.1675	-0.101133
PC(39:1)	11.17_830.6624m/z		830.662	11.1698	40568.5	2.69	18220.3	19764.2	18580.1	24918.2	25511.5	24177.9	10774.1	9255.97	7727.65	11616.4	11593.2	10583.6	6365.21	5477.53	6722.01	33760.7	33603.2	54341.7	48805	29264.6	36961.3	20667.5	24721.6	29620.9	32394.1	40796.1	41115.9	LMGP01012012	PC(39:1)	M+H	C47H92NO8P	37.2	0	-1.09114	87.1844		http://nonlinear.com/redirect/outbound?p=lipidmaps&param=LMGP01012012
PC(39:4)	9.61_824.6147m/z		824.615	9.60818	87875.2	0.37	39550.7	38678	38830.9	41151.6	41409.6	41133.7	21709.1	20939.7	20934	38618.6	36372.2	34395.8	3568.82	4236.7	6126.49	57393.6	57882.1	67379.4	31187.7	23498.7	28594.3	54777.9	63511.5	71479.5	86055.8	82782.6	94787.1	LMGP01011725	PC(39:4)	M+H	C47H86NO8P	38.1	0	-1.98206	92.7149		http://nonlinear.com/redirect/outbound?p=lipidmaps&param=LMGP01011725
PC(39:5)	10.13_822.5993m/z		822.599	10.1276	402893	1.75	142996	151366	149497	195520	197379	190767	415845	394025	398808	133500	134848	125081	290626	201279	262671	145028	124187	166232	388137	308209	297098	101758	115901	133651	85878.6	73358.3	102522	LMGP01011942	PC(39:5)	M+H	C47H84NO8P	37.9	0	-1.74742	91.4552		http://nonlinear.com/redirect/outbound?p=lipidmaps&param=LMGP01011942
PC(39:6)a	8.91_820.5842m/z		820.584	8.91233	109703	3.48	39264.3	45338.5	42067.7	57180.7	59628.3	55668.8	23612.6	20652.3	16612.2	18289.9	21111.2	18601.2	10082.6	9208.66	8426.31	83579.7	85636.3	125086	70822.8	45063.1	53948.6	96874.6	104610	127625	74849.5	79286.4	89607.1	LMGP01012104	PC(39:6)a	M+H	C47H82NO8P	37.2	0	-1.03763	87.4174		http://nonlinear.com/redirect/outbound?p=lipidmaps&param=LMGP01012104
PC(39:6)b	9.75_820.5835m/z		820.584	9.74502	1.00402e+06	0.46	449487	454432	453433	597210	600561	595072	459814	349372	349597	215645	210109	196763	1.13976e+06	835982	1.0363e+06	622778	511735	712993	1.06814e+06	808046	877400	691525	776569	901989	497206	425535	537107	LMGP01012104	PC(39:6)b	M+H	C47H82NO8P	38.3	0	-1.90631	93.8148		http://nonlinear.com/redirect/outbound?p=lipidmaps&param=LMGP01012104
PC(40:10)	7.99_826.5372m/z		826.537	7.9911	190229	0.81	40333.6	40212	40831.2	45621.3	45357.7	43843.5	18571.4	36813.5	33133.9	64193.6	47198.9	46767.9	92814.2	67036	77215.6	9463.47	7154.82	8669.88	11821.1	8277.47	7069.11	182945	172860	214884	70392.4	55394.1	72964.3	HMDB08511	PC(40:10)	M+H	C48H76NO8P	43.7	0	-3.34707	95.1689	-0.0873
PC(40:3)	11.36_840.6460m/z		840.646	11.3623	348859	3.04	75784.3	81557	76735.5	91300.7	93708.7	88192.7	59506.7	73747.9	63402.7	43302.2	45325.7	42233.5	379100	303843	363633	68326.2	58636.8	88643.1	182171	95855.1	141515	34305.4	40244.1	49396.3	72286.3	67094.5	76021.4	LMGP01011799	PC(40:3)	M+H	C48H90NO8P	41.6	0	-3.37106	91.1951	-0.1804
PC(40:4)	11.06_838.6313m/z		838.631	11.0598	171897	2.41	43560.8	48198.9	45043.9	55813.5	54994.8	51437.5	131026	198372	186291	32245.2	32418.9	31011	162017	113723	149540	25473	24734	37342.5	66848.9	39750.8	49025.5	15716.2	19115	24993.9	32336.8	30199.3	36967.1	LMGP01011023	PC(40:4)	M+H	C48H88NO8P	45.8	0	0.111956	87.224	-0.0631
PC(40:5)	10.55_836.6151m/z		836.615	10.551	1.15393e+06	0.43	258549	281446	275819	348798	351248	351525	1.00429e+06	1.34402e+06	1.11347e+06	584622	591983	529757	302090	209952	258669	221063	202153	275785	417958	321777	343034	120660	135824	163303	109542	100717	130897	LMGP01010816	PC(40:5)	M+H	C48H86NO8P	43.3	0	-0.483635	96.0443	-0.1654
PC(40:6)a	10.02_834.5991m/z		834.599	10.0184	1.37455e+06	0.49	710251	713076	706162	812333	826074	811387	802666	1.12219e+06	915978	1.02984e+06	1.02763e+06	963924	1.53664e+06	1.18211e+06	1.4049e+06	445232	380040	504193	1.11439e+06	770765	857358	976951	1.07329e+06	1.24608e+06	905867	726380	972312	HMDB08727	PC(40:6)a	M+H	C48H84NO8P	40.6	0	-0.967113	95.4106	-0.4554
PC(40:6)b	10.29_834.5995m/z		834.599	10.2923	1.03672e+06	1.41	406189	416913	401260	494881	496080	483485	360079	382145	334053	99881.9	98270.6	96636.6	1.05682e+06	890844	1.1625e+06	576982	528690	722943	618995	471784	507798	442235	481756	519349	614904	521371	650035	HMDB08089	PC(40:6)b	M+H	C48H84NO8P	38.5	0	-1.50619	94.1213		http://nonlinear.com/redirect/outbound?p=hmdb&param=HMDB08089
PC(40:7)	9.57_831.5760n	831.576	832.583	9.56762	4.22599e+06	0.98	1.27962e+06	1.23703e+06	1.24338e+06	1.39265e+06	1.42012e+06	1.40836e+06	554236	639515	582529	366412	376297	355112	4.7162e+06	3.75298e+06	4.2088e+06	844223	723035	956837	2.15155e+06	1.61242e+06	1.91092e+06	1.53715e+06	1.70116e+06	1.84104e+06	1.71251e+06	1.36613e+06	1.6987e+06	HMDB08729	PC(40:7)	M+H, M+Na	C48H82NO8P	43.5	0	-3.56405	96.5869	-0.1184
PC(40:8)	8.99_830.5678m/z		830.568	8.99463	675234	1.01	162886	163646	160498	157439	173914	168621	132515	242555	239733	68724.1	62104.8	59406	813470	562199	650032	42555.2	34163.1	48017.1	120595	87185.9	80939.4	206651	212540	240258	228626	197193	246295	LMGP01011890	PC(40:8)	M+H	C48H80NO8P	41.9	0	-3.0933	86.429	-0.1009
PC(40:9)	8.50_828.5529m/z		828.553	8.49988	607182	3.68	90661.2	98188.7	94149.5	101812	108370	101690	91585.8	169424	143066	84240.3	74043.4	61833.3	758441	525353	537753	18152	15560.6	26339	45808.5	30619.8	29890.5	74710.4	73893.7	100377	75182.2	62880.3	78515.5	LMGP01011948	PC(40:9)	M+H	C48H78NO8P	44.1	0	-2.73615	95.3259	-0.0873833
PC(41:5)	10.22_850.6309m/z		850.631	10.2235	85074.9	0.64	24926.9	25194	25217.2	26971.8	28345.8	26797.9	6342.74	4943.55	4634.19	7054.68	8076.24	6712.47	8467.13	6040.75	10634.9	43535.5	39359.4	48485.5	28926.3	20621.8	21722.6	22806.5	25154	29898.9	73125.5	89412.8	92686.3	LMGP01011950	PC(41:5)	M+H	C49H88NO8P	36.9	0	-1.35188	86.052		http://nonlinear.com/redirect/outbound?p=lipidmaps&param=LMGP01011950
PC(41:7)	9.99_846.5988m/z		846.599	9.99132	200369	1.16	66018.4	67406.2	67317.4	81558.5	85738.9	78753.7	24966.9	20870.5	19879.5	12683.8	13553.1	13078	218346	152962	229800	68423.9	54488.6	77024.7	173438	140623	153776	73342	81720.6	88040.3	80945.3	66331.6	84943.5	LMGP01012114	PC(41:7)	M+H	C49H84NO8P	42.1	0	-0.362219	90.0726	-0.158383
PC(42:6)	10.95_862.6312m/z		862.631	10.9498	379494	3.91	58675.8	65802.5	59766.8	74813.8	75242.1	70073.2	60348.7	77072.9	63583.4	10202.7	10610	9195.5	431985	294916	411580	19296.5	19158	33675.4	169412	92793.4	100351	25007.2	28559.7	36234.1	11808.6	11725.5	15431.1	HMDB08734	PC(42:6)	M+H	C50H88NO8P	43.8	0	-0.0205055	92.9416	0.1251
PC(42:7)	10.42_860.6147m/z		860.615	10.4152	2.2062e+06	1.48	451030	493142	458650	492973	499992	485444	179004	194801	150695	94313.3	103404	97335.8	2.43301e+06	1.68098e+06	2.50462e+06	296771	246485	322384	655905	488237	509521	442469	452726	555694	525503	432853	553110	LMGP01012059	PC(42:7)	M+H	C50H86NO8P	42.7	0	-0.865278	94.144	-0.1664
PC(42:8)	9.80_858.5994m/z		858.599	9.80002	738210	2.72	154582	160678	152520	154106	152867	145190	27712.4	44484.6	42344.3	17005.1	16121.5	15878.9	895692	562259	756680	54725.8	44291.3	58787.6	118450	87381.3	95589.1	161394	174519	211813	254138	230817	279737	HMDB08354	PC(42:8)	M+H	C50H84NO8P	41.4	0	-0.162082	94.1574	-0.268783
PC(44:12)	8.79_878.5685m/z		878.568	8.7886	108816	2.86	21334.9	22618.4	20644.4	26991.5	28566.1	27599.8	3313.56	3387.77	3174.53	1217.51	1284.92	1061.57	152551	75921.5	97975.9	13160.9	11031.1	17817.1	24006	16611	18234.6	67192.5	59927.6	76654.1	37211.1	30221.8	40834.5	LMGP01011119	PC(44:12)	M+H	C52H80NO8P	41.5	0	-3.1163	84.627	-0.100683
PC(44:8)	10.63_886.6312m/z		886.631	10.6335	89000.9	1.84	33201.4	32366.8	31449.8	36133.6	35958.2	37197.3	6597.15	6881.13	5856.37	3487.45	3637.4	3619.84	80425.3	64904.8	75232.8	23438	19679.7	28945	40503.7	27662.5	32080	50790.3	60928.8	76072.6	87076	80167.9	99758.9	HMDB08616	PC(44:8)	M+H	C52H88NO8P	39.7	0	-0.128877	85.5351	-0.2996
PC(O-30:0)	9.69_692.5582m/z		692.558	9.69017	252364	1.8	120144	119022	114173	120082	119747	123674	89204.6	91666.1	81998.6	86047.7	111804	85000.6	123428	100371	99026.7	95921.3	93488.5	129044	143331	86314.8	93363.6	130101	155039	192255	231718	246627	278748	LMGP01020012	PC(O-30:0)	M+H	C38H78NO7P	42.9	0	-2.78315	94.7731	-0.133317
PC(O-32:0)	10.56_720.5896m/z		720.59	10.5648	554339	1.3	184793	182993	171183	162004	165803	162244	133256	143103	118473	205770	237917	179713	150376	109760	118570	85899.6	80754.5	124375	145363	89911.3	97572.6	77110.7	91557.2	116325	493225	549860	619934	LMGP01020029	PC(O-32:0)	M+H	C40H82NO7P	42.5	0	-1.8335	95.0568	-0.1801
PC(O-32:2) PC(P-32:1)	9.25_716.5584m/z		716.558	9.25403	85805.5	2.31	41862.9	44076.8	43204.4	52696.3	54281.8	51875.6	37454.3	35903.6	34077.3	62737.5	69340	58858.4	21979.7	15766	20555.9	36088.3	36809.7	53269.9	119574	65706.9	72135	59401.3	67524.8	75661.8	63023.5	78127	85069.6	HMDB07929	PC(O-32:2) PC(P-32:1)	M+H	C40H78NO7P	42.3	0	-2.10896	92.6603	-0.14315
PC(O-34:0) PC(P-34:1)	9.58_742.5738m/z		742.574	9.58112	825138	1.16	234460	225616	225597	176606	180004	176279	44750.1	38951.3	37508.6	49116.8	53037.3	40222.2	360516	286514	322010	53880.4	50177.7	65679	161151	110725	110080	110019	120527	133989	766727	801847	906840	HMDB08029	PC(O-34:0) PC(P-34:1)	M+H	C42H80NO7P	42.8	0	-2.48151	93.7364	-0.132367
PC(O-34:1) PC(P-34:0)	10.74_746.6054m/z		746.605	10.7435	293097	1.49	103169	105982	99047.1	102490	104360	101330	107171	125267	101820	339380	294428	245482	98026.7	79300.8	83537.1	61980.8	61235.7	92683.3	133461	69483.2	78493	47797.7	53309.6	63844.8	128874	142614	167297	LMGP01030052	PC(O-34:1) PC(P-34:0)	M+H	C42H84NO7P	42.3	0	-1.81833	95.194	-0.194
PC(O-34:2) PC(P-34:1)	10.14_744.5897m/z		744.59	10.1413	848498	0.47	307830	309201	306299	266919	271615	264293	137028	143363	127043	623445	546949	452544	269426	181277	218388	90547.8	91985.7	125269	316306	185069	187033	113822	127652	144532	704283	891140	950073	HMDB08028	PC(O-34:2) PC(P-34:1)	M+H	C42H82NO7P	42.8	0	-2.36564	96.4106	-0.1636
PC(O-34:4) PC(P-34:3)	9.23_740.5583m/z		740.558	9.22653	363514	2.25	149162	157373	153083	170586	175711	168165	258411	227035	229582	151921	168458	141172	105910	86529.4	101867	150630	162669	243623	197364	136687	148210	109182	111713	137282	325317	339960	425266	HMDB11212	PC(O-34:4) PC(P-34:3)	M+H	C42H78NO7P	43.1	0	-0.415155	94.5327	-0.141033
PC(O-34:5) PC(P-34:4)	8.68_738.5428m/z		738.543	8.67858	718150	0.92	183715	199659	187740	233499	235447	231147	87392.7	80864.1	71909	132376	143374	113141	31707.6	26895.4	32101.4	189817	181189	281186	196480	106930	135219	654558	669345	830546	360387	341991	408971	LMGP01090033	PC(O-34:5) PC(P-34:4)	M+H	C42H76NO7P	39.1	0	-0.582829	95.9838		http://nonlinear.com/redirect/outbound?p=lipidmaps&param=LMGP01090033
PC(O-35:2) PC(P-35:1)	10.56_758.6049m/z		758.605	10.5648	64935.7	0.95	26066.1	29337.2	26330.3	33880.9	34248.5	33606.6	34647.7	23561	19663.3	64066.4	56531.8	45260.7	55622.2	40935.7	52452.8	21270.8	19772	32094.2	89600.4	53858.4	51348.2	10549.8	10705.8	15491.4	16313.8	20741.2	24005.8	LMGP01030055	PC(O-35:2) PC(P-35:1)	M+H	C43H84NO7P	37	0	-1.21101	86.3272		http://nonlinear.com/redirect/outbound?p=lipidmaps&param=LMGP01030055
PC(O-35:4) PC(P-35:3)	9.68_754.5739m/z		754.574	9.67647	123481	2.75	53393.9	57176.5	54401.3	70569.3	73046.4	74532.2	130127	115904	124412	69857.7	70700.9	59375.6	42531.6	35195.4	38943.6	94420.9	106749	139441	136208	111041	103260	26804.9	28066.2	32740.6	23671.4	21472.7	26026.6	LMGP01020026	PC(O-35:4) PC(P-35:3)	M+H	C43H80NO7P	42.4	0	-0.631868	92.9922	-0.16275
PC(O-35:5) PC(P-35:4)	9.13_752.5582m/z		752.558	9.1306	370181	1.66	115908	119781	118312	138058	145604	140305	80380	69500.7	66892.7	110310	114198	96851.3	51753.2	41703.7	54234.8	137616	134929	195952	170291	111847	118104	359210	344783	406550	185459	178525	215417	PC(O-35:5)	PC(O-35:5) PC(P-35:4)	M+H	C43H79NO7P+	41.5	0	-0.886531	94.7104	-0.2394
PC(O-36:1) PC(P-36:0)	11.66_774.6368m/z		774.637	11.6648	210215	3.25	86589	96309.6	88463.1	87443.3	91924.7	86550.3	113338	114536	98971.9	174967	154481	132131	77124.4	61238.9	72410	42484.2	42062.4	76535.6	92900.7	45516.8	53507.5	63361.2	64600.5	82997.1	179703	203762	247182	LMGP01020202	PC(O-36:1) PC(P-36:0)	M+H	C44H88NO7P	42.2	0	-0.649789	95.0095	-0.239
PC(O-36:2) PC(P-36:1)	10.99_772.6211m/z		772.621	10.9911	235126	2.94	111256	121696	113545	120119	125084	118185	110807	114651	99993.3	219433	188821	160981	165132	108664	133555	72090.5	67199.3	108813	188142	97510.4	117676	58436.9	63791.8	81092.3	200185	229081	276113	LMGP01030081	PC(O-36:2) PC(P-36:1)	M+H	C44H86NO7P	41	0	-1.1166	93.7694	-0.3177
PC(O-36:4) PC(P-36:3)	10.11_768.5892m/z		768.589	10.1139	2.27397e+06	1.9	799152	854325	828636	890688	911639	878102	2.02624e+06	2.54764e+06	2.24804e+06	2.45759e+06	2.20567e+06	1.87608e+06	566471	378925	477988	610086	645708	913693	1.0107e+06	735578	762615	240351	251167	291124	491304	461704	554335	HMDB13407	PC(O-36:4) PC(P-36:3)	M+H	C44H82NO7P	41.2	0	-0.756601	87.0822	-0.1707
PC(O-36:5) PC(P-36:4)	9.57_765.5662n	765.566	766.574	9.56762	9.24331e+06	0.58	2.87283e+06	2.8887e+06	2.85524e+06	2.40041e+06	2.46462e+06	2.45568e+06	1.04909e+06	1.26611e+06	1.1599e+06	3.85043e+06	3.19172e+06	2.81725e+06	707840	519264	592719	1.23363e+06	1.20935e+06	1.65417e+06	1.39794e+06	946808	1.06124e+06	3.044e+06	3.08538e+06	3.55188e+06	9.33793e+06	8.39611e+06	9.99588e+06	HMDB13415	PC(O-36:5) PC(P-36:4)	M+H, M+Na	C44H80NO7P	39.3	0	-1.31353	97.9968		http://nonlinear.com/redirect/outbound?p=hmdb&param=HMDB13415
PC(O-36:6) PC(P-36:5)	9.10_764.5581m/z		764.558	9.10332	2.34763e+06	1.36	706399	725449	712672	847844	877540	859710	294686	230472	220842	300537	319998	302905	303127	245084	291041	1.01129e+06	983497	1.29239e+06	955471	671332	716566	2.23498e+06	2.27568e+06	2.53223e+06	1.24889e+06	1.23466e+06	1.41548e+06	HMDB08260	PC(O-36:6) PC(P-36:5)	M+H	C44H78NO7P	43.4	0	-0.970801	96.0413	0.12755
PC(O-37:4) PC(P-37:3)	10.54_782.6049m/z		782.605	10.5373	939562	1.52	188143	212141	199577	243109	249080	242265	990996	943830	883860	434247	385281	324149	97332.8	54282.9	67922.5	155943	156158	230112	353249	296248	263163	33690.1	31478	41865.5	30183.9	29304.2	36633.4	40109	PC(O-37:4) PC(P-37:3)	M+H	C45H84NO7P	42.4	0	-0.850486	95.2676	-0.2061
PC(O-37:5) PC(P-37:4)	10.00_780.5896m/z		780.59	10.0049	617428	2.22	379121	407747	390761	431563	445198	426599	517287	517868	473517	689784	596695	518641	270255	178450	219106	347892	338398	475532	620302	440754	449735	464163	487398	562157	603578	566967	681738	PC(O-37:5)PC(P-37:4)	PC(O-37:5) PC(P-37:4)	M+H	C45H83NO7P+	41.5	0	-0.776147	95.161	-0.2751
PC(O-37:6) PC(P-37:5)	9.54_778.5735m/z		778.573	9.54058	658108	1.25	268137	275586	269745	330059	337259	337348	115750	89738.4	89787.9	122366	119126	110018	292989	176924	215046	452207	455101	578218	528076	401098	403406	619368	654185	700772	367652	321015	378652	PC(O-37:6)PC(P-37:5)	PC(O-37:6) PC(P-37:5)	M+H	C45H81NO7P+	42.9	0	-1.33244	94.0918	-0.139417
PC(O-38:2) PC(P-38:1)	11.77_800.6523m/z		800.652	11.7749	409637	2.39	164573	172426	167095	165925	172761	163607	143028	167339	137335	228335	206674	192113	236111	165301	207705	90966.1	83088.1	148474	228055	123705	152558	84926.4	96975.4	125563	351628	416719	460564	LMGP01020228	PC(O-38:2) PC(P-38:1)	M+H	C46H90NO7P	42.2	0	-0.637136	95.403	-0.2522
PC(O-38:3) PC(P-38:2)	11.21_798.6367m/z		798.637	11.2111	358966	2.67	133879	141050	134614	142523	143975	136850	88624.7	102558	79587.1	167746	155572	134542	184477	106409	136610	105803	103704	159910	200745	113571	141169	80527.8	89988.5	113866	302038	372771	402088	LMGP01020230	PC(O-38:3) PC(P-38:2)	M+H	C46H88NO7P	42.5	0	-1.37698	94.9215	-0.194
PC(O-38:4) PC(P-38:3)	10.98_796.6207m/z		796.621	10.9773	1.43846e+06	2.69	198113	238198	218598	260771	266145	252290	1.36675e+06	1.60494e+06	1.34367e+06	637908	560890	482279	101901	74974	82392.8	111976	120056	185782	257239	167462	177425	26257	26724.9	34755.3	29255.2	26843.6	32822.6	HMDB08359	PC(O-38:4) PC(P-38:3)	M+H	C46H86NO7P	42.7	0	-0.631677	96.4751	-0.2136
PC(O-38:5) PC(P-38:4)a	10.21_794.6048m/z		794.605	10.2098	1.58215e+06	1.62	665502	686692	681034	640550	671817	648679	874347	1.13878e+06	954952	1.21738e+06	1.05692e+06	935418	274267	150386	194842	442799	431433	577889	513777	389196	429941	467088	499062	599572	1.40078e+06	1.5243e+06	1.82137e+06	HMDB13432	PC(O-38:5) PC(P-38:4)a	M+H	C46H84NO7P	38.5	0	-1.28252	93.9422		http://nonlinear.com/redirect/outbound?p=hmdb&param=HMDB13432
PC(O-38:5) PC(P-38:4)b	10.46_794.6046m/z		794.605	10.4556	1.11304e+06	1.81	665056	728189	693020	751997	751695	728513	1.0131e+06	1.17219e+06	943099	1.27516e+06	1.08822e+06	975730	1.01099e+06	677709	812727	476170	475291	667310	984952	650157	630571	697194	699213	822617	921449	844155	1.02839e+06	HMDB11317	PC(O-38:5) PC(P-38:4)b	M+H	C46H84NO7P	38.5	0	-1.47965	94.4403		http://nonlinear.com/redirect/outbound?p=hmdb&param=HMDB11317
PC(O-38:6) PC(P-38:5)	9.96_791.5815n	791.581	792.589	9.9643	1.67054e+07	1.25	5.17924e+06	5.2231e+06	5.09607e+06	4.52525e+06	4.6829e+06	4.55028e+06	3.00317e+06	2.56346e+06	2.49573e+06	2.0669e+06	2.05864e+06	1.79395e+06	4.45199e+06	2.91044e+06	3.45306e+06	3.26241e+06	3.18249e+06	4.09253e+06	3.65175e+06	2.77453e+06	2.94194e+06	5.36019e+06	5.73697e+06	6.24019e+06	1.64331e+07	1.5327e+07	1.83562e+07	LMGP01030068	PC(O-38:6) PC(P-38:5)	M+H, M+Na	C46H82NO7P	41.8	0	-1.04409	91.911	-0.1854
PC(O-38:7) PC(P-38:6)	9.24_790.5736m/z		790.574	9.24028	746314	1.69	329671	355142	339789	433445	445883	432721	188680	126845	124931	133445	144641	136202	239001	128419	192498	516825	539411	703928	695679	565275	589116	679097	705923	853922	580435	559300	702146	LMGP01030015	PC(O-38:7) PC(P-38:6)	M+H	C46H80NO7P	41.5	0	-2.89107	87.9322	-0.1294
PC(O-39:2) PC(P-39:1)	12.04_814.6674m/z		814.667	12.0361	80270.7	3.55	31767.4	34739.3	31622.9	42877.8	44199.7	41171.4	114818	54522	57479.9	28847.8	29885.1	23261.7	55573.1	41052.5	52678.4	37944.4	33455.2	51798.1	102920	64061.1	73831.2	13584.3	16630.3	20715.8	26322.8	28162.5	32702.5	LMGP01030092	PC(O-39:2) PC(P-39:1)	M+H	C47H92NO7P	39.2	0	-1.50833	86.189	-0.3891
PC(O-39:6) PC(P-39:5)	10.39_806.6045m/z		806.604	10.3882	822565	1.4	370673	394432	372930	450314	457286	444716	359138	286445	261003	192312	184849	161765	1.03421e+06	634494	798988	434142	401239	552136	853680	643288	589213	459193	482584	555487	375930	317768	386495	PC(O-39:6)	PC(O-39:6) PC(P-39:5)	M+H	C47H85NO7P+	43.7	0	-1.61459	94.2332	-0.1218
PC(O-40:3) PC(P-40:2)	12.01_826.6679m/z		826.668	12.0086	99759.1	2.53	51903.8	58123.5	54934.4	68077	69141.4	65793.5	68665.4	79138.1	60661.8	67317.2	67642.3	56575.5	100060	59856.6	83804.6	61904.3	52061.4	81095.5	127189	71266.7	100821	28084.2	33910.2	45856.4	69450.8	77395.6	85378.1	LMGP01020249	PC(O-40:3) PC(P-40:2)	M+H	C48H92NO7P	38.7	0	-0.58829	94.4609		http://nonlinear.com/redirect/outbound?p=lipidmaps&param=LMGP01020249
PC(O-40:4)	10.76_796.6210m/z		796.621	10.7573	512795	0.79	128078	137836	131762	147528	147376	145439	430018	592436	515931	338467	298114	233908	101634	60883.1	75854.4	87960.4	94995.1	139466	144581	108791	109498	35288	40470.9	48749.3	69251.4	76016.2	90817.1	HMDB08359	PC(O-40:4)	M+H	C46H86NO7P	41.1	0	-0.362567	96.3389	-0.4336
PC(O-40:5)	11.06_822.6363m/z		822.636	11.0598	817951	2.11	144188	168861	155802	203192	206703	198184	792227	948259	713368	344100	298981	261791	85832.9	54422.6	74763	125676	128793	198863	292800	196714	216776	57603	62681.6	80370.2	63446.3	60710.6	74173	HMDB11259	PC(O-40:5)	M+H	C48H88NO7P	42.6	0	-0.590683	96.7769	-0.2266
PC(O-40:6) PC(P-40:5)	10.54_820.6202m/z		820.62	10.5373	454407	1.08	260976	281470	268159	310786	317399	315459	424675	542267	396279	364051	332417	279571	355522	131599	208245	257697	244255	348284	469952	309431	333606	328162	347305	428163	361480	348482	406545	LMGP01020110	PC(O-40:6) PC(P-40:5)	M+H	C48H86NO7P	39.7	0	-3.28802	93.6244	-0.469
PC(O-40:7)	10.39_818.6043m/z		818.604	10.3882	336169	0.77	143363	154244	149462	180451	179776	172340	58322.1	53034.9	38214.3	51305.2	51069.2	51843.5	67913.1	43840.9	63807.4	228396	226397	299157	244590	173502	177345	301274	333996	373237	313053	309298	367759	LMGP01030014	PC(O-40:7)	M+H	C48H84NO7P	42.4	0	-0.776867	86.4501	0.1171
PC(O-40:7) PC(P-40:6)a	9.55_816.5882m/z		816.588	9.5541	121534	1.96	58133.6	60456.6	57917.6	67602.1	70185.7	69617.4	23436.4	11916.1	12318.7	8452.99	10078.6	13195.1	70437.4	41781.3	84340.3	107853	125570	131178	107709	95864	89729.6	82364.8	80900.3	94075.4	81679.7	73807.3	104922	HMDB08754	PC(O-40:7) PC(P-40:6)a	M+H	C48H82NO7P	44.9	0	-2.50631	93.6097	-0.0769167
PC(O-40:7) PC(P-40:6)b	10.09_818.6044m/z		818.604	10.0866	601772	1.44	284388	288347	273159	306126	312267	303695	177218	181601	143733	88955.5	93850.7	77504.4	1.09549e+06	261979	447844	293285	269916	343816	489559	350249	387778	344650	369294	445711	315232	294024	354277	LMGP01030014	PC(O-40:7) PC(P-40:6)b	M+H	C48H84NO7P	42.6	0	-0.638489	95.4887	-0.1845
PC(O-42:6) PC(P-42:5)	11.43_848.6520m/z		848.652	11.4311	66805.1	3.38	20060.6	22927.3	20156.6	25964	26513.2	24807.8	30327.8	36004.2	26459.9	5260.58	5230.23	4365.19	83536.5	42256.9	69908.5	14222	14415.8	23323.6	92425.8	52758	55231.5	11311.4	11301.7	14895.3	8553.84	9373.44	10683.3	LMGP01020244	PC(O-42:6) PC(P-42:5)	M+H	C50H90NO7P	46.9	0	-0.378293	86.5442	0.0491
PC(O-42:7) PC(P-42:6)	10.91_846.6362m/z		846.636	10.9085	367627	3.06	133982	151417	136001	174260	176083	166198	139031	136949	95511.7	35570.5	37379.9	30688.4	441899	253038	407944	146047	136890	199997	372258	225900	247662	139260	147983	201057	146679	140970	159531	LMGP01030104	PC(O-42:7) PC(P-42:6)	M+H	C50H88NO7P	42.2	0	-0.43925	94.7067	-0.228
PC(P-40:3)	11.58_824.6521m/z		824.652	11.5823	225393	2.47	47168.3	55772.8	51530.5	62157.3	64808	62071.7	201012	266972	208194	72041.7	62597	55364.1	72935.7	43588.4	58169.5	49190	48827.6	72972.8	96142.5	57875.2	68078.8	16988.7	19679.2	25929.6	26979	28004.5	31480.8	HMDB13442	PC(P-40:3)	M+H	C48H90NO7P	42	0	-0.220904	94.0472	-0.2527
PC(P-40:4)	11.35_822.6364m/z		822.636	11.3486	171377	2.4	37935.7	43549.1	39788.5	48172.9	48164.5	46193.6	86762.7	109186	83198.3	16163.2	15891.4	13106.6	192625	146829	174676	21336.9	22316.3	33617.5	119832	66251	67288.6	7665.24	9052.18	10031.6	9993.91	10741.9	12602.4	HMDB11259	PC(P-40:4)	M+H	C48H88NO7P	45.8	0	-0.477613	87.1065	0.0622
PC(P-40:6)	10.70_818.6043m/z		818.604	10.7023	85352.7	1.29	29121.1	34443.5	32091.6	45935.7	45522.3	44783.3	42298.4	41914.7	37649.2	22091.8	18710.6	16913.9	62081.8	79946	61543.2	80759.7	78943.7	96354.8	96095	55110	67556.2	19423	19363.7	23668.8	23506.3	19315.1	23107.2	LMGP01030014	PC(P-40:6)	M+H	C48H84NO7P	40.7	0	-3.43326	86.3622	-0.1664
PE(33:1)	9.76_704.5244m/z		704.524	9.75877	162535	8.8	68842	81705.9	70323.8	59585	51688.5	51031.4	77132.2	51938.2	36646.8	22730.5	21014.6	14721.4	78242.4	66027.9	66304.4	1768.85	1367.52	2244.82	17434.4	9522.48	9685.53	99420.9	99173.6	118324	116630	175567	195407	HMDB08894	PE(33:1)	M+H	C38H74NO8P	38.3	0	2.68689	94.7879		http://nonlinear.com/redirect/outbound?p=hmdb&param=HMDB08894
PE(36:0)	10.29_748.5845m/z		748.585	10.2923	178029	1.59	75045.2	77421.2	73994	101288	100661	98266.3	217576	150169	166343	39614.6	50097.1	36684.7	107943	63078.7	87695.6	94805.8	79990.8	124782	197574	128392	131289	72390.9	84714	102686	65567.5	61232.4	72480	LMGP02011179	PE(36:0)	M+H	C41H82NO8P	38.4	0	-0.738255	92.8058		http://nonlinear.com/redirect/outbound?p=lipidmaps&param=LMGP02011179
PE(36:4)	8.20_740.5222m/z		740.522	8.19737	187255	2.2	29942.8	29494.9	28667.6	28311.8	27585.4	26523.3	16645.7	9203.46	10101.6	3911.5	3163.74	3041.07	224539	151780	185447	6662.11	4373.64	6761.8	14444.3	8514.51	9195.23	27687.9	30033.4	39782.3	39956.6	37510	46369.2	HMDB09189	PE(36:4)	M+H	C41H74NO8P	41	0	-0.838234	86.3015	-0.137083
PE(36:5)	9.17_738.5063m/z		738.506	9.17157	76202.1	3.72	25023.2	25298.2	26798.8	25826	27583.8	27639.4	10998.2	17749.3	16930.5	38931.9	41623	43274.5	22875.1	23003.7	21111.7	6245.83	6282.62	8934.63	14555.6	8345	7894.15	68927.2	73156.5	86522.6	63424.4	63985.4	78081.1	LMGP02011217	PE(36:5)	M+H	C41H72NO8P	50.9	0	-2.80106	92.1644	-0.01965
PE(37:2)	10.16_730.5400m/z		730.54	10.155	409144	4.32	68851.7	81452.4	70309.2	56019	51581.8	49539	11853.1	7096.44	5290.97	906.484	937.184	859.919	408584	381372	437476	1170.13	825.188	1494.15	11349.2	8260.39	7142.84	22972.4	25949.6	27434.4	51174.2	65538.6	78143.4	HMDB09285	PE(37:2)	M+H	C40H76NO8P	51.2	0	0.723464	95.3915	-0.0261
PE(38:1)	10.59_774.6000m/z		774.6	10.5923	193426	1.05	78383.2	82902.7	79455.2	110265	111223	108931	245717	94489.7	109445	96286.2	99923.6	91781.7	186119	128491	167560	106080	95428.6	138605	257475	150479	172325	39819.4	44882.1	55234.6	37074	39293.8	47972.5	LMGP02010137	PE(38:1)	M+H	C43H84NO8P	42	0	-0.990223	92.5986	-0.1917
PE(38:3)	11.25_770.5691m/z		770.569	11.2523	122457	1.89	71221	48718.3	66030	84133.4	82429.6	81017.3	71094.5	93551.7	107507	113269	123416	73566.4	114726	111819	140827	62371.3	41970.5	109286	123110	62867.3	81303.1	54869.2	79038.9	107150	72771.4	68353.9	52473.2	HMDB09163	PE(38:3)	M+H	C43H80NO8P	40.4	0	-2.49757	94.0738	0.3698
PE(38:4)	9.58_764.5218m/z		764.522	9.58112	81850.7	1.71	29909.7	28266.3	30521	31496.7	31269.9	30484.7	11456	22729	22912.2	10725	10768.4	7591.2	91632.1	73088	80832	11266.8	8993.15	14477	22093.4	14968.3	16739.1	64765.7	72462.3	84454	55972.4	59645.2	62177.6	HMDB09682	PE(38:4)	M+H	C43H74NO8P	39.3	0	-2.59745	86.6617	0.2527
PE(38:5)	10.03_766.5370m/z		766.537	10.032	158789	0.85	68780.7	66614.7	69758.4	74115.2	72877.3	73387	65495.4	108723	105277	87096.5	96944.7	88652.8	69630.1	62325	71695	33179.7	29521.3	40376.8	56101.4	35057.6	35612.3	129058	140815	154211	152026	139882	184459	HMDB09649	PE(38:5)	M+H	C43H76NO8P	47.9	0	-2.50398	90.9925	-0.039
PE(38:6)	9.76_764.5220m/z		764.522	9.75877	94492.4	2.41	45942.2	32969.2	42563.4	51771.2	50313.9	49357.1	44359.3	66267.6	75749.9	103189	108197	72090.6	23940.2	27874.9	34785.3	31571.7	23264	50908.2	43195.8	23478	28322.2	66807.6	90916.8	116008	66058.9	58955	49395.1	HMDB09682	PE(38:6)	M+H	C43H74NO8P	38.7	0	-2.37713	88.1974	0.43035
PE(40:3)	11.86_798.6003m/z		798.6	11.8574	86444.9	1.95	49475	35577.3	46599.3	60568.9	59798.8	58287.7	55898.9	91298	102098	47433.3	55482.2	37558.8	82930.5	70864.1	105540	44610.8	31585.4	95242.9	84660	40325.3	55758.4	37241.2	55833.4	79618.2	48411.3	47405	34243.9	HMDB09361	PE(40:3)	M+H	C45H84NO8P	42.6	0	-1.03085	92.7873	0.1736
PE(40:5)	9.34_794.5679m/z		794.568	9.33652	1.54355e+06	0.18	709785	712157	710239	862782	883340	857274	1.43423e+06	1.23229e+06	1.23728e+06	584872	573260	521137	1.04073e+06	834367	1.00528e+06	606556	490933	678087	1.01133e+06	744760	809293	1.40151e+06	1.49584e+06	1.7333e+06	1.01353e+06	910913	1.1668e+06	HMDB09236	PE(40:5)	M+H	C45H80NO8P	38.4	0	-1.92306	94.2026		http://nonlinear.com/redirect/outbound?p=hmdb&param=HMDB09236
PE(40:6)	10.43_792.5526m/z		792.553	10.4286	270525	2.37	107360	101158	108389	120838	119972	115591	73668.4	128793	136765	37613.1	48911.1	39771.3	178074	151818	198846	62636.4	57054.2	79145.1	106072	74777.1	74876	253135	275321	283120	221023	208759	249022	HMDB09684	PE(40:6)	M+H	C45H78NO8P	47.5	0	-2.91803	90.2498	-0.0413
PE(42:5)	9.36_822.5989m/z		822.599	9.36402	666574	1.88	269156	285703	276353	328961	332365	320414	105027	88066.5	79063.8	120792	125489	122752	65237.8	72485.2	70495.3	441202	446145	588602	370304	261770	288665	474048	552013	593382	657674	616134	725913	HMDB09241	PE(42:5)	M+H	C47H84NO8P	38.6	0	-2.29005	95.9429		http://nonlinear.com/redirect/outbound?p=hmdb&param=HMDB09241
PE(42:7)	9.16_818.5677m/z		818.568	9.15792	191828	1.4	74626.9	72340.2	71113	92038.1	94487.4	92505.9	38507.8	28909.3	30334.6	27998.7	26216	26457.9	152720	115697	134309	81454.5	69019.3	96169.8	147482	104060	120475	171865	188348	215270	124524	111454	134837	LMGP02010989	PE(42:7)	M+H	C47H80NO8P	42.2	0	-0.0287826	90.1262	-0.142167
PE(O-32:1) PC(P-32:0)	9.87_718.5739m/z		718.574	9.86877	414882	2.61	168167	175826	166562	166772	173055	164599	172592	240457	188366	256096	277083	210261	69465.4	56219.1	67148.6	106471	97625.5	139765	189528	110843	126681	126169	148136	177486	379101	403375	462170	LMGP01030074	PE(O-32:1) PC(P-32:0)	M+H	C40H80NO7P	42.8	0	-2.22267	95.0782	-0.147233
PE(O-36:3) PE(P-36:2)	11.17_728.5586m/z		728.559	11.1698	160587	1.58	53379.3	66865	61161.6	61613	63404.9	61816	45934.6	39200	33303.8	68637.6	73918.1	59806.3	113666	65652.5	71471.1	29949.2	33484.3	45070.8	83868.7	49052.1	50781.2	40292.1	42504.6	49652.7	127492	157133	197136	HMDB11349	PE(O-36:3) PE(P-36:2)	M+H	C41H78NO7P	38.8	0	-0.392192	94.2364		http://nonlinear.com/redirect/outbound?p=hmdb&param=HMDB11349
PE(O-37:2) PE(P-37:1)	11.97_744.5904m/z		744.59	11.9674	104919	1.27	38355.4	48100	44035.5	57653.1	58191.9	56746.3	70866.4	35671.3	33209.3	29611.2	27943.1	28338.8	139116	71713.2	91060.2	47659.2	54565.1	82338.1	136050	87859.7	90847.2	29690.4	30226	38527.1	25873.5	31796	36281.6	LMGP02030071	PE(O-37:2) PE(P-37:1)	M+H	C42H82NO7P	51.2	0	-2.0888	95.6609	-0.0291
PE(O-37:3) PE(P-37:2)	11.57_742.5743m/z		742.574	11.5686	154802	2.19	64322.6	80407.7	73309.8	83833.7	87500	86429.1	80290.4	56765.2	54956	96912	89315.8	80518.6	218346	118128	127934	61467.5	66862.5	92138.7	177530	115360	115308	65403.1	68402.7	75230.4	62738.7	66156.2	80856.1	LMGP02030072	PE(O-37:3) PE(P-37:2)	M+H	C42H80NO7P	47.7	0	-0.587095	95.019	-0.0602
PE(O-37:6) PE(P-37:5)	10.05_736.5268m/z		736.527	10.0456	68715.3	1.07	36568	43047.4	39309.1	38950.5	40846.4	39575.5	40902.9	32317.8	31417.3	69309	58988.4	58077.5	34185.8	19067.1	20840.4	26829.4	28744.6	34577.1	46343.9	32067.5	31519.1	63821	63127.6	64491.9	64317	61160.4	80668.6	PE(P-37:5)	PE(O-37:6) PE(P-37:5)	M+H	C41H87NO7P+	50.2	0	-3.01168	92.6175	-0.0254
PE(O-38:2) PE(P-38:1)	12.46_757.5982n	757.598	758.605	12.4624	468642	2.79	143878	177372	161827	175623	185630	179779	138464	113872	94810	89265	80311.8	86497	525094	381030	499802	144216	175443	214371	300372	200661	196936	135751	140655	155697	161882	182434	215003	HMDB11446	PE(O-38:2) PE(P-38:1)	M+H, M+Na	C43H84NO7P	53.9	0	-1.95244	95.0413	-0.0155
PE(O-38:3) PE(P-38:2)	11.97_755.5825n	755.583	756.59	11.9674	1.99251e+06	1.79	836710	1.10988e+06	969338	1.06282e+06	1.1001e+06	1.07258e+06	1.01537e+06	818431	686536	1.36017e+06	1.27496e+06	1.2646e+06	2.48129e+06	1.71436e+06	1.78187e+06	679356	785259	1.15829e+06	1.33535e+06	782652	802058	762262	770435	887366	1.34289e+06	1.69452e+06	2.08728e+06	HMDB11357	PE(O-38:3) PE(P-38:2)	M+H, M+Na, 2M+H	C43H82NO7P	51.6	0	-1.98765	97.6653	-0.0291
PE(O-38:4) PE(P-38:3)	11.28_754.5742m/z		754.574	11.2798	152462	0.2	66438.1	82657.5	76694.6	81330.9	81537.4	81215.8	66405.4	66711.2	51529.9	64171.3	60173.1	58927.7	128923	73136.7	88769.9	50775.8	59237.1	77594.6	116436	73244.4	76885	97123.2	100058	106411	127747	142360	187281	HMDB11384	PE(O-38:4) PE(P-38:3)	M+H	C43H80NO7P	37.6	0	-0.366016	88.5505		http://nonlinear.com/redirect/outbound?p=hmdb&param=HMDB11384
PE(O-38:5) PE(P-38:4)	11.00_751.5512n	751.551	752.558	11.0048	1.31626e+06	2.38	220286	302747	272897	268221	281289	275004	1.43245e+06	1.28577e+06	1.23056e+06	701263	613421	633866	157750	119598	123015	113972	135376	193539	214933	145644	130031	69078.5	66689	74183.1	65483.2	65960.3	83031.8	LMGP02030078	PE(O-38:5) PE(P-38:4)	M+H, M+Na	C43H78NO7P	48.8	0	-2.28234	95.4314	-0.0427
PE(O-38:6) PE(P-38:5)	10.48_749.5349n	749.535	750.542	10.4827	1.56916e+06	0.66	572755	687062	654295	598507	620273	615490	598444	548670	511009	1.01175e+06	865246	944605	386161	363742	396665	345080	374548	442057	410949	283615	270617	962539	952265	963703	1.37921e+06	1.42412e+06	1.90414e+06	HMDB11359	PE(O-38:6) PE(P-38:5)	M+H, M+Na, 2M+H	C43H76NO7P	47.6	0	-1.06927	96.9263	-0.0585
PE(O-39:3) PE(P-39:2)	12.19_770.6054m/z		770.605	12.1874	163544	2.03	54265.2	67362.5	61629.3	72122.2	74142.5	71269.5	66070.3	43950.1	41199.2	52709.7	49028.1	48797.3	221537	119790	149305	50186.5	56360.9	87564.6	130237	87255.8	91316.3	61708.2	64289.5	68809.8	58742.6	62777	73811.3	PE(P-39:2)	PE(O-39:3) PE(P-39:2)	M+H	C44H85NO7P+	53.8	0	-1.9519	94.7439	-0.0154
PE(O-39:7) PE(P-39:6)	10.43_762.5423m/z		762.542	10.4286	75867.6	0.43	26519	33842.9	30603.2	31981.3	32542.5	33662.3	15027.6	8717.72	7727.71	10662	9243.37	9116.12	100756	59380	67466.7	15244.5	13895.1	19302.6	35882.3	25823.9	22134.5	63732.2	63407.6	63192.1	44557.2	45154.7	54862.9	PE(P-39:6)	PE(O-39:7) PE(P-39:6)	M+H	C44H77NO7P+	47	0	-2.20796	86.9486	-0.0413
PE(O-40:3) PE(P-40:2)	12.56_783.6138n	783.614	784.621	12.5587	883337	4.16	389157	493341	451468	449254	486780	459655	447308	384507	323477	333607	294904	314563	973256	776235	900521	267153	321425	415694	551703	343908	359939	476364	505785	556212	719966	822402	958031	LMGP02030083	PE(O-40:3) PE(P-40:2)	M+H, M+Na	C45H86NO7P	54.5	0	-1.37108	97.5823	-0.0155
PE(O-40:4) PE(P-40:3)	12.04_781.5979n	781.598	782.605	12.0361	658105	2.19	273489	350646	315306	339156	356730	339791	241356	222334	176947	241251	234241	231189	604515	400796	496658	231040	271925	381339	506377	303851	325738	338579	348374	394166	539210	648779	786327	HMDB09578	PE(O-40:4) PE(P-40:3)	M+H, M+Na	C45H84NO7P	38.8	0	-0.799862	95.0271		http://nonlinear.com/redirect/outbound?p=hmdb&param=HMDB09578
PE(O-40:6)	11.10_778.5742m/z		778.574	11.1011	217624	1.14	70862.8	90520.4	81696	89694.7	91763.2	90716.8	241240	229107	182524	100235	90993.1	90474.7	71344.1	49973.9	58225.5	43402.5	47068.6	67746.2	96257.2	62142.6	66021.4	99492.1	92536.1	104548	101815	108823	137778	LMGP02030086	PE(O-40:6)	M+H	C45H80NO7P	50.4	0	-2.13446	93.6715	-0.0289
PE(O-40:7)	10.58_776.5584m/z		776.558	10.5785	152190	3.81	60289.5	73984.2	68571.5	70358.3	74736.1	75572	66368.2	61963.5	48547.9	56634.4	52058.4	49337.6	68622.4	42681.9	58246.9	46286.5	49065.8	64066.8	88655.3	57472.7	60020	115256	112671	126934	137170	141291	178109	LMGP02030005	PE(O-40:7)	M+H	C45H78NO7P	47.9	0	-2.13596	91.8257	-0.0427
PE(O-42:4) PE(P-42:3)	12.63_810.6365m/z		810.637	12.6274	75741.2	3.43	37212.8	47239.3	44883.8	46836.6	50155.2	48780	47647.8	47036.9	33110.5	25724.7	23953	22450.6	93591.3	52875.8	80756.6	30892.6	33643.9	40674.9	84145.9	55304	62306.8	47534.4	50547.9	57483.1	59874.1	65415.8	71694.8	LMGP02020088	PE(O-42:4) PE(P-42:3)	M+H	C47H88NO7P	50.8	0	-2.17896	92.9333	-0.0293
PE(O-42:5)	11.05_810.6363m/z		810.636	11.0461	173098	0.27	29468.9	34677.4	31537.4	40723.5	40081.6	39138.3	173352	172567	173374	52221	45057.9	37004.7	35543	21058.7	25744.8	23253.1	24509.5	36225.4	69090.6	47711.1	48602.9	5560.7	6135.74	7797.02	4181.95	4959.05	6453.51	LMGP02020088	PE(O-42:5)	M+H	C47H88NO7P	39.5	0	-0.990179	87.4925	-0.3632
PE(O-42:5) PE(P-42:4)a	10.63_808.6205m/z		808.621	10.6335	128537	2.09	55438	60412.8	59670.8	68001.5	70738.9	70244.9	133404	132840	119367	117950	97882.5	85259.9	53026.1	30825.7	39721.3	61985.4	59704.2	82082.5	101194	73175.4	73664.7	45394.1	49385.1	57881.5	53934	52541	68926.1	LMGP02030091	PE(O-42:5) PE(P-42:4)a	M+H	C47H86NO7P	38	0	-1.17109	91.2837		http://nonlinear.com/redirect/outbound?p=lipidmaps&param=LMGP02030091
PE(O-42:5) PE(P-42:4)b	10.94_808.6207m/z		808.621	10.936	168878	4.24	54750.8	60888.2	55322.4	72799.3	71813.1	67191.1	127152	122183	109409	39812.6	39597.1	30011.9	214251	130474	161908	32242.1	32991.7	50949.7	207588	135023	123162	16831.3	19048.9	23925.5	15504	14498.1	16754.2	LMGP02030091	PE(O-42:5) PE(P-42:4)b	M+H	C47H86NO7P	38.4	0	-1.00382	93.2937		http://nonlinear.com/redirect/outbound?p=lipidmaps&param=LMGP02030091
PE(O-42:7) PE(P-42:6)	9.86_804.5889m/z		804.589	9.85502	185914	1.95	55122.6	59132.8	57014.8	78738.4	78025.6	75843.7	20834.9	10102.6	12919.9	17992	17826.7	15986.7	74079.2	49930.4	71693.4	73001.5	83316.1	115340	232165	161386	164192	75270.5	82064	92872.2	58002.4	54648.8	65665.4	LMGP02030092	PE(O-42:7) PE(P-42:6)	M+H	C47H82NO7P	39.2	0	-0.184438	86.5306	-0.394783
PE(O-46:9) PE(P-46:8)	12.04_856.6211m/z		856.621	12.0361	159962	3.86	31553.5	40283.6	36241.4	36841.2	38292.2	35444.3	11325.9	9164.56	7568.91	12564.7	12837.5	14976.2	7772.07	6986.92	8436.82	16352.9	18772.1	31017.3	24874.2	13202.8	15023.5	60730.8	59551.6	69716.2	121738	159413	198734	PE(P-46:8)	PE(O-46:9) PE(P-46:8)	M+H	C51H87NO7P+	48.9	0	-2.13769	93.6994	-0.043
PE(P-40:5)	11.38_778.5742m/z		778.574	11.3761	421847	0.69	63872.3	84469.7	73130.3	74486.7	75654.9	72238.4	98574.9	89772	79016.8	15737.4	17541.2	15551.4	482556	365241	417743	21206	27188.5	38242.4	125737	71026.9	62939.5	35003.6	35434.8	35413.5	26782.1	28410	38203.1	LMGP01020175	PE(P-40:5)	M+H	C45H80NO7P	50.4	0	-1.96923	92.815	-0.029
PE(P-40:6)	10.85_775.5512n	775.551	776.558	10.8535	832840	0.07	246983	310288	277937	252645	265497	253988	137315	111646	91693.6	61696.9	61668.6	61616.5	874073	747357	877090	88924.2	95794	126461	183762	109631	109078	461002	460188	492202	535887	577205	716471	LMGP02030005	PE(P-40:6)	M+H, M+Na	C45H78NO7P	48.6	0	-2.31463	94.9163	-0.0427
PE(P-42:4)	11.61_780.5896m/z		780.59	11.6098	278629	2.8	62847.3	84163.7	74539.6	74680	78937.6	76324.6	265025	312279	258584	81379.8	70255	74089.5	139370	103117	112360	30457.1	36839.9	55489.9	73580.2	44627	45741.2	40630.7	40614.3	46039.5	40792.2	43860	56444.8	HMDB11391	PE(P-42:4)	M+H	C45H82NO7P	46.4	0	0.20324	88.2539	-0.0602
Pectenolone	5.43_581.3984m/z		581.398	5.43342	141537	5.85	17345.4	21248.4	18676.7	25400.7	25182.7	22820.5	195864	93711.5	135036	6927.85	5745.63	3157.2	95517.5	15157.2	54718.4	10768.4	6897.42	17550.8	5871.4	2657.59	2608.41	3622.34	3618.99	3076.98	3777.55	3975.64	6508.33	LMPR01070068	Pectenolone	M+H	C40H52O3	37.7	0	-0.819174	89.6891		http://nonlinear.com/redirect/outbound?p=lipidmaps&param=LMPR01070068
PG(32:0)	7.94_740.5431m/z		740.543	7.93608	78005.6	1.55	21099.3	21440.9	23516	20412.2	20384.9	20950.4	31241.7	6856.12	11628.1	8831.35	5382.87	7227.4	101566	56154.5	76295.8	4027.68	2598.8	4558.38	9889.81	4888.97	4799.77	30679.4	32025.6	49033.3	47823.8	44609.8	63742.8	HMDB10570	PG(32:0)	M+NH4	C38H75O10P	43.9	0	0.359185	82.2567	-0.0545167
PI(40:3)	7.51_934.6391m/z		934.639	7.50982	158844	2.6	144471	103963	112010	102608	99853.4	97315.3	1270.44	94929.8	288462	86259.7	90603.5	87186.4	1322.68	113409	86036.9	138858	200953	136721	88227.1	114795	129086	105178	185466	71450.6	153506	94412	67301.5	LMGP06010680	PI(40:3)	M+NH4	C49H89O13P	43.2	0	-2.98955	96.0556	-0.100983
PS(40:6)	9.61_836.5419m/z		836.542	9.60818	92504.1	1.43	42102.1	44064.3	47050.1	56862.8	57232.3	58433.5	28232.8	30581.9	43774.7	16371.7	21703.9	20828.8	87147	69828.4	93048.5	51508	52890.5	73786.9	89705.5	57903.4	51485.1	74599.3	88447.9	102347	88331.2	84128	105053	HMDB12444	PS(40:6)	M+H	C46H78NO10P	55.4	0	-4.35648	92.6718	0.0047
PS(O-38:2) PS(P-38:1)	11.58_802.5948m/z		802.595	11.5823	132230	2.96	46670.4	65863.8	61358.9	65315.8	69096.6	66201.9	81516.8	63137	68280	52307.8	44915	50161.4	156590	102418	137680	52331.9	69091.6	90649.4	117765	75923.5	64126.2	56723.3	54935.5	64816.2	59886.9	60712.7	81841.2	LMGP03020035	PS(O-38:2) PS(P-38:1)	M+H	C44H84NO9P	54.9	0	-1.17835	85.7635	-0.0052
PS(O-40:3) PS(P-40:2)	11.68_827.6036n	827.604	828.611	11.6786	460727	4.42	206233	291714	277939	250577	278165	266536	353508	277897	294762	290314	261954	281576	440056	327401	391038	182316	228756	321839	390246	260698	193192	224992	224932	242647	419839	413869	548472	LMGP03020062	PS(O-40:3) PS(P-40:2)	M+H, M+Na	C46H86NO9P	51.2	0	-2.42061	94.3618	0.0259
PS(O-40:6) PS(P-40:5)	10.50_822.5629m/z		822.563	10.4963	124539	1.06	20714.5	31928.4	28742.8	28393	29001.2	28686.1	47776.9	32196.6	38168.9	6678.76	6876.6	6613.25	153832	98131.6	121654	9339.07	12524.3	17183.5	57905.2	39107	27005.8	13755.7	15018.5	13784.8	9980.13	10066.3	14300.8	LMGP03020083	PS(O-40:6) PS(P-40:5)	M+H	C46H80NO9P	51.8	0	-3.65224	86.3207	0.0127
PS(O-40:7) PS(P-40:6)	9.99_820.5468m/z		820.547	9.99132	197609	1.3	62354.5	86767.2	83114.7	70165.5	72081.5	75245.9	42536.2	26506.3	29338.9	28084.8	26056.4	28258	181141	122719	154419	34703.4	42346.2	50889.5	71325.7	48709	38885.3	128318	131122	131367	179132	174157	239538	LMGP03030089	PS(O-40:7) PS(P-40:6)	M+H	C46H78NO9P	53.8	0	-2.03965	91.254	-0.00998333
PS(O-42:2) PS(P-42:1)	12.89_858.6587m/z		858.659	12.8882	473961	3.86	114480	122245	114359	87109.1	85663.3	80260.7	119099	170811	135238	2317.22	2515.79	1926.91	72353.1	93861.6	114794	1966.84	2319.41	3568.2	4425.02	2958.39	3526	36644.3	27452.9	36052.2	408371	390147	623366	LMGP03020067	PS(O-42:2) PS(P-42:1)	M+H	C48H92NO9P	39.1	0	0.583197	96.1553		http://nonlinear.com/redirect/outbound?p=lipidmaps&param=LMGP03020067
TG(39:6)	14.04_826.6906m/z		826.691	14.0385	274452	2.74	98903.9	104036	99675.6	72734.9	74201.7	70126	71447	78492.2	52602.2	44344.3	34143	24941.7	186199	207788	276735	288.935	71.1483	172.661	2499.92	1823.27	1750.84	58807.9	48453.7	62577.6	271554	231967	319835	LMGL03013294	TG(39:6)	M+NH4	C52H88O6	36.7	0	-1.57425	85.4431		http://nonlinear.com/redirect/outbound?p=lipidmaps&param=LMGL03013294
TG(40:5)	14.74_824.6879n	824.688	842.722	14.7396	1.96361e+07	0.57	7.9673e+06	8.06843e+06	7.99095e+06	5.81885e+06	5.8476e+06	5.88547e+06	7.53597e+06	1.22462e+07	8.22677e+06	3.50622e+06	2.80156e+06	2.22005e+06	1.46947e+07	2.00518e+07	2.41619e+07	38022	13739.8	14772.6	171327	141357	138461	2.593e+06	2.23525e+06	2.6423e+06	1.76229e+07	1.45075e+07	2.03342e+07	LMGL03012781	TG(40:5)	M+NH4, M+Na, M+K	C53H92O6	44.3	0	-0.341138	93.7454	-0.1539
TG(42:0)	14.59_740.6751m/z		740.675	14.5915	629086	1.14	121653	123434	120694	88465.9	89542.8	93210.7	39177.9	63063.1	42258.8	16572.5	13769.8	13657.4	479407	688238	719613	4708.43	4788.89	4009.72	7626.61	7132.77	4959.49	54578.8	50380.7	72794.4	85362.3	73557.8	92304.9	HMDB42061	TG(42:0)	M+NH4	C45H86O6	43.7	0	-1.2017	93.2559	-0.1675
TG(44:0)	15.13_750.6725n	750.672	768.706	15.1299	2.07307e+06	0.59	578435	582181	571996	427247	428695	432201	425604	638794	428488	223555	173009	162437	1.5735e+06	2.22937e+06	2.41635e+06	18330.3	16635.9	13465.1	32552.9	30754.4	25642.7	261883	258674	324956	708708	588556	770325	HMDB42063	TG(44:0)	M+NH4, M+Na	C47H90O6	44.5	0	-1.08322	94.9171	-0.1534
TG(44:1)	14.67_748.6568n	748.657	766.691	14.6723	766424	0.91	359850	353882	359045	282228	277057	285810	572016	1.06683e+06	660426	345298	279388	226335	485123	640426	811703	12578.1	11936.7	8710.38	23277.8	17181.8	14068.5	308865	269526	363657	561717	441417	591380	HMDB42273	TG(44:1)	M+NH4, M+Na	C47H88O6	44.2	0	-1.23006	94.1757	-0.154
TG(44:2)	14.24_764.6752m/z		764.675	14.241	230523	0.99	91445.6	92136.7	93254.7	69827.3	69767.4	68036.7	61222.2	115257	68068.4	115891	85655.9	64422.3	171624	240010	279935	3572.65	3456.83	2582.28	6235.69	4421.38	3620.98	70080.8	56660.8	86030.8	170362	135856	179647	LMGL03013272	TG(44:2)	M+NH4	C47H86O6	45.2	0	-0.966279	93.4026	-0.114
TG(45:0)	15.39_782.7220m/z		782.722	15.3856	171280	2.15	85009.2	77995.7	84759.1	60445.5	62471.5	62952.2	91336.4	96573.3	85800.9	47882.8	41795	40270.8	134864	159559	219417	19112.7	19879.5	15263.1	26806.7	22990.9	21454.8	66144.1	69421.8	67743.8	136733	109717	141450	HMDB42093	TG(45:0)	M+NH4	C48H92O6	37.7	0	-1.59361	90.5622		http://nonlinear.com/redirect/outbound?p=hmdb&param=HMDB42093
TG(45:1)	14.94_780.7063m/z		780.706	14.9415	149001	1.56	88260.1	84213.9	83085.4	68794.7	66947.9	68782.7	133124	177256	136624	98175.8	82949.7	64208.9	107725	113677	158408	15691.3	16485.1	11648.8	20546.6	18282.8	14851.1	74943.8	73615	79611.7	155380	118157	153248	HMDB43164	TG(45:1)	M+NH4	C48H90O6	43.6	0	-1.11316	90.5394	-0.1536
TG(46:0)	15.63_778.7038n	778.704	796.738	15.628	2.19628e+06	0.74	1.04298e+06	1.08563e+06	1.05289e+06	780315	773407	784853	1.24351e+06	1.66643e+06	1.10978e+06	1.46567e+06	1.15648e+06	1.03658e+06	1.34213e+06	1.84571e+06	2.1632e+06	44547.7	42193.5	33772.4	95604.9	57227	80487.8	361060	387557	441453	2.25118e+06	1.90308e+06	2.43459e+06	HMDB42064	TG(46:0)	M+NH4, M+Na	C49H94O6	45.4	0	-0.978323	96.4511	-0.1391
TG(46:1)	15.20_776.6875n	776.687	794.721	15.1972	6.50653e+06	0.85	2.67961e+06	2.72531e+06	2.7078e+06	2.11902e+06	2.10127e+06	2.17914e+06	4.00195e+06	6.51983e+06	4.27694e+06	3.84932e+06	2.9344e+06	2.58125e+06	5.00062e+06	6.82064e+06	7.69832e+06	55892.1	45843.3	36088.2	168773	103733	78241.3	1.15647e+06	1.09786e+06	1.34935e+06	3.50457e+06	2.93621e+06	3.75683e+06	HMDB42274	TG(46:1)	M+NH4, M+Na, M+K	C49H92O6	44.3	0	-1.98754	94.9261	-0.1533
TG(46:2)	15.01_806.7218m/z		806.722	15.0088	404387	0.31	202035	201753	200829	160272	153875	151637	393573	469009	350579	411869	328234	251546	225743	261177	339630	19590.1	20662.7	15037.1	39810.5	27820.9	22446.2	110556	108034	114872	323525	251925	331774	HMDB42511	TG(46:2)	M+NH4	C50H92O6	42.2	0	-1.12095	86.5369	-0.1804
TG(46:3)	14.40_772.6568n	772.657	790.691	14.4029	3.37687e+06	0.44	761817	786472	759172	573703	569259	573526	645260	1.0291e+06	630816	233431	164038	115240	2.64929e+06	3.49182e+06	3.98951e+06	5839.77	3632.64	3053.94	14126.5	18225.6	7735.69	186668	151499	188854	811225	652860	861080	HMDB42541	TG(46:3)	M+NH4, M+Na	C49H88O6	37.1	0	-1.60693	87.4572		http://nonlinear.com/redirect/outbound?p=hmdb&param=HMDB42541
TG(46:4)	14.11_770.6410n	770.641	788.675	14.1061	2.54081e+06	1.48	656590	670976	652377	497028	495707	477951	537425	902632	513656	30429.6	23841.7	15364.2	1.78446e+06	2.88394e+06	2.95404e+06	2970.3	1016.45	1467.74	4558.19	9649.94	5519.3	200681	157759	214821	1.21115e+06	993944	1.37164e+06	LMGL03012766	TG(46:4)	M+NH4, M+Na	C49H86O6	44	0	-1.28853	94.254	-0.1546
TG(46:5)	13.74_786.6596m/z		786.66	13.7399	453194	3.09	128881	134409	126608	96613.7	95402.9	89945.4	63450.5	109316	57958.3	17270.4	13018.4	9576.27	129013	176920	212453	367.208	132.152	132.491	1003.69	764.21	1363.08	112338	78465.7	135835	450180	378450	530952	LMGL03013355	TG(46:5)	M+NH4	C49H84O6	37.1	0	-1.2709	86.9896		http://nonlinear.com/redirect/outbound?p=lipidmaps&param=LMGL03013355
TG(47:0)	15.86_810.7535m/z		810.753	15.857	262958	2.36	160975	154199	155015	120897	114062	113169	224538	197216	183170	216973	170910	172904	155225	185626	245916	40991.1	41070.9	30525.6	52399.6	44534.3	42421	102508	110567	99637.2	281869	215302	291702	HMDB43857	TG(47:0)	M+NH4	C50H96O6	45.4	0	-0.930146	93.7922	-0.1251
TG(47:1)	15.44_808.7370m/z		808.737	15.4394	654706	1.96	360439	344066	332187	282186	273004	282715	666489	729842	567785	583426	479163	410210	441379	511026	673597	43203.1	45425.1	31586.2	67267.9	55219.7	45427.1	193032	200701	204523	534926	432044	553369	HMDB42362	TG(47:1)	M+NH4	C50H94O6	37.7	0	-2.3932	91.488		http://nonlinear.com/redirect/outbound?p=hmdb&param=HMDB42362
TG(47:3)	14.67_804.7063m/z		804.706	14.6723	282814	2.39	102762	100879	97214.1	74581.6	77623.4	77862.3	160407	158527	118129	68592.2	56838.5	40471.7	236078	256020	356342	3730.26	3781.47	3014.98	8044.23	6333.98	5026.67	35885.5	33204.4	37758.3	168634	124241	174604	HMDB42542	TG(47:3)	M+NH4	C50H90O6	36.8	0	-1.62252	85.9297		http://nonlinear.com/redirect/outbound?p=hmdb&param=HMDB42542
TG(47:4)	14.39_802.6906m/z		802.691	14.3894	219065	1.61	78657.9	87744.2	83672.9	62538.4	60795.1	60865.3	99915.2	98810.9	65302	11028	8125.97	5366.7	177043	216936	263217	348.743	185.296	254.479	1415.22	1494	1228.49	29439.6	23306.1	28866.4	203178	162814	226663	LMGL03014177	TG(47:4)	M+NH4	C50H88O6	37.5	0	-1.67494	89.5634		http://nonlinear.com/redirect/outbound?p=lipidmaps&param=LMGL03014177
TG(48:0)	16.07_806.7352n	806.735	824.769	16.0731	2.92091e+06	1.43	1.16403e+06	1.22453e+06	1.18211e+06	863888	878773	854277	1.15766e+06	1.41608e+06	963343	3.56429e+06	2.54413e+06	2.65431e+06	487924	673568	801391	60986.4	60024.6	45958.5	146858	63014.3	101115	226279	258057	276821	2.72012e+06	2.37985e+06	3.01542e+06	HMDB42991	TG(48:0)	M+NH4, M+Na	C51H98O6	46.2	0	-1.01967	97.5023	-0.1242
TG(48:1)	15.68_804.7193n	804.719	822.753	15.6819	1.18803e+07	0.34	4.74988e+06	5.07212e+06	4.91244e+06	3.78817e+06	3.79003e+06	3.76681e+06	5.92963e+06	8.41787e+06	5.71206e+06	1.43749e+07	1.08204e+07	1.04457e+07	6.47614e+06	8.43245e+06	9.95428e+06	116975	90320.8	70200.7	464492	174480	156835	1.04446e+06	1.06926e+06	1.21511e+06	6.4036e+06	5.44893e+06	7.12669e+06	HMDB42275	TG(48:1)	M+NH4, M+Na, M+K, 2M+Na	C51H96O6	45.6	0	-1.15645	97.907	-0.1389
TG(48:2)a	15.26_802.7029n	802.703	820.737	15.2645	1.40283e+07	1.43	5.42222e+06	5.43198e+06	5.63182e+06	4.42119e+06	4.43618e+06	4.5386e+06	8.46724e+06	1.32612e+07	8.81335e+06	1.74915e+07	1.29494e+07	1.16439e+07	5.81636e+06	7.45596e+06	9.42469e+06	90127.7	71582	60884.6	736947	186740	168638	1.63185e+06	1.51591e+06	1.79325e+06	6.79596e+06	5.62815e+06	7.49148e+06	LMGL03015008	TG(48:2)a	M+NH4, M+Na, M+K	C51H94O6	44.5	0	-1.53398	95.219	-0.1532
TG(48:2)b	16.19_858.7662n	858.766	876.8	16.1947	1.00955e+07	0.83	3.71613e+06	3.89915e+06	3.78388e+06	2.81649e+06	2.84559e+06	2.79922e+06	2.12699e+06	2.64035e+06	1.83213e+06	1.22012e+07	8.99128e+06	9.09388e+06	7.01388e+06	9.04565e+06	1.05807e+07	102626	101005	63603	588327	199226	170768	513544	504956	569098	4.3451e+06	3.8105e+06	5.03846e+06	HMDB47174	TG(48:2)b	M+NH4, M+Na, M+K	C55H102O6	45.9	0	-1.27859	96.018	-0.1236
TG(48:5)	14.17_796.6566n	796.657	814.69	14.1736	4.73177e+06	1.35	1.70181e+06	1.75594e+06	1.72122e+06	1.30141e+06	1.29351e+06	1.26823e+06	1.74706e+06	2.85566e+06	1.79251e+06	343361	258400	187944	2.32225e+06	3.21313e+06	3.91279e+06	7277.67	2434.61	2600.09	19355.6	18594.8	22022.6	1.13967e+06	903386	1.17139e+06	4.82951e+06	3.92267e+06	5.44314e+06	HMDB42841	TG(48:5)	M+NH4, M+Na	C51H88O6	42.1	0	-1.3825	86.4016	-0.1679
TG(48:6)	13.74_812.6747m/z		812.675	13.7399	1.30123e+06	2.66	430698	446081	423559	324175	319032	304587	359872	589624	347078	87183.6	63498.5	45111.4	634693	866304	995623	4982.83	4376.28	5128.08	8413.33	6830.81	7059.69	252608	179100	288537	1.28956e+06	1.09269e+06	1.52144e+06	LMGL03014157	TG(48:6)	M+NH4	C51H86O6	40.6	0	-1.41603	85.8671	-0.2497
TG(48:7)	13.34_810.6597m/z		810.66	13.342	419254	2.37	105096	109626	105430	81867.6	79406.9	76266.8	133955	223681	132645	5441.68	4820.28	3104.06	115166	150011	174044	248.786	58.4445	314.375	1171.26	853.524	1383.55	40176.5	27825.2	43869.4	401468	347053	509241	HMDB48322	TG(48:7)	M+NH4	C51H84O6	41.5	0	-0.893733	86.6649	-0.1964
TG(49:1)	15.91_818.7351n	818.735	836.769	15.911	1.01227e+06	0.5	495955	491132	492519	391593	386391	381445	901393	705690	615628	1.20184e+06	942720	892258	579165	663710	898543	63055.5	61436	44367.6	98150.9	75122.7	64742.7	204381	215543	215587	705798	564146	758855	HMDB11705	TG(49:1)	M+NH4, M+Na	C52H98O6	45.3	0	-0.986546	93.5118	-0.1249
TG(49:2)	15.52_816.7188n	816.719	834.753	15.5202	1.32779e+06	1.56	573702	563789	556194	438443	437086	454247	1.02023e+06	896023	731129	1.61963e+06	1.24937e+06	1.11437e+06	630713	739978	1.00363e+06	46613.8	45642.7	33354.9	127913	71581.8	62494.4	227590	234128	239187	846306	670751	872120	LMGL03015011	TG(49:2)	M+NH4, M+Na	C52H96O6	37.6	0	-2.32844	90.7329		http://nonlinear.com/redirect/outbound?p=lipidmaps&param=LMGL03015011
TG(49:3)	15.12_832.7374m/z		832.737	15.1165	741840	0.76	314700	318149	313505	238163	233953	235731	422335	373475	281544	593477	449293	345014	589461	696289	939769	10867.1	11014.9	8280.14	44919.1	23765.4	19956.4	84677.1	81716.8	88393.3	510944	423599	568341	HMDB43425	TG(49:3)	M+NH4	C52H94O6	43	0	-1.0885	85.6746	-0.1399
TG(49:4)	14.83_830.7219m/z		830.722	14.8339	748627	0.8	291153	292794	288178	215348	207224	208377	379485	347163	251442	130020	108595	73418.4	600642	710113	935126	2348.83	1822.71	1600.52	13296.2	9634.97	8295.74	61104.7	55394.4	64177.4	610049	512382	718295	LMGL03014683	TG(49:4)	M+NH4	C52H92O6	37.9	0	-1.59664	91.5823		http://nonlinear.com/redirect/outbound?p=lipidmaps&param=LMGL03014683
TG(49:5)	14.51_828.7063m/z		828.706	14.5107	672446	1.09	257008	267925	263851	195265	192549	191115	252309	274910	192836	101630	83449.8	60524.6	481104	576719	739831	1391.75	732.298	958.124	6996.39	5418	4988.8	122503	104653	124649	682308	561201	773827	HMDB42842	TG(49:5)	M+NH4	C52H90O6	41.9	0	-1.03071	91.8448	-0.2618
TG(50:0)	16.49_852.8008m/z		852.801	16.4937	410851	1.25	170361	171404	167333	125612	121852	119859	168401	203546	155390	263656	196283	210396	87044.4	140572	156298	30215.6	32368.6	23241.5	32936.6	27850.7	31992.8	62086.6	72723.1	66042.1	403297	356157	473099	HMDB05357	TG(50:0)	M+NH4	C53H102O6	46.3	0	-0.786498	96.7298	-0.1211
TG(50:1)	16.14_832.7506n	832.751	850.784	16.1406	9.03281e+06	1.09	2.87281e+06	3.00344e+06	2.84738e+06	2.15184e+06	2.19014e+06	2.14689e+06	1.9231e+06	2.36103e+06	1.61428e+06	1.07741e+07	8.03218e+06	8.29215e+06	3.20148e+06	4.25291e+06	5.14446e+06	87165.6	79357.2	55179.6	321471	118808	113711	412487	426842	498670	4.12601e+06	3.72539e+06	4.81562e+06	HMDB44857	TG(50:1)	M+NH4, M+Na, M+K	C53H100O6	46.2	0	-1.26962	97.5237	-0.1239
TG(50:2)	15.75_830.7340n	830.734	848.768	15.7492	2.10269e+07	0.83	7.10176e+06	7.2825e+06	7.27745e+06	5.46685e+06	5.53624e+06	5.45006e+06	5.20425e+06	6.71293e+06	4.52385e+06	2.58821e+07	1.91457e+07	1.8053e+07	1.03229e+07	1.32553e+07	1.55998e+07	123706	100946	81049.4	1.14836e+06	299731	278338	955506	942044	1.07074e+06	8.83188e+06	7.64589e+06	1.02247e+07	HMDB46433	TG(50:2)	M+NH4, M+Na, M+K, 2M+Na	C53H98O6	45.3	0	-2.10717	95.0132	-0.1254
TG(50:6)	14.39_822.6719n	822.672	840.706	14.3894	1.51286e+07	0.63	5.28953e+06	5.49974e+06	5.40101e+06	4.03139e+06	3.99726e+06	3.98191e+06	4.48936e+06	8.38346e+06	5.35172e+06	2.69109e+06	1.9649e+06	1.51498e+06	1.16049e+07	1.51267e+07	1.86542e+07	22875.3	7871.44	9097.4	102664	81113.7	59412.7	2.59051e+06	2.07337e+06	2.61104e+06	1.05176e+07	8.68786e+06	1.18862e+07	LMGL03012782	TG(50:6)	M+NH4, M+Na, M+K	C53H90O6	37.8	0	-2.21517	91.8012		http://nonlinear.com/redirect/outbound?p=lipidmaps&param=LMGL03012782
TG(50:9)	13.25_834.6595m/z		834.659	13.2457	1.14851e+06	4.22	226728	246162	232994	169785	167407	155824	64141.8	96234.8	64080.7	6386.44	5268.5	5641.32	182088	254279	313563	5937.26	6723.01	7247.49	11658.6	9208.02	10719.2	170220	124689	180064	1.03122e+06	958633	1.45567e+06	LMGL03012854	TG(50:9)	M+NH4	C53H84O6	44.2	0	-0.0246006	94.8289	-0.1552
TG(51:1)	16.34_864.8005m/z		864.8	16.3436	453301	1.12	214656	216346	207437	163506	161747	159884	287442	180922	165575	466186	352079	350300	377661	408939	573301	26320.9	26538.9	18936.8	37492.1	30702	25423.6	68367.1	71871.8	74543.7	282113	242602	325514	HMDB46283	TG(51:1)	M+NH4	C54H102O6	45.8	0	-0.962258	91.896	-0.1093
TG(51:2)	15.26_862.7843m/z		862.784	15.2645	92199.4	5.38	50979.8	45706.5	50124.3	33561.6	33277.4	38680	30192.9	57307.9	73079.8	100285	85896.9	90416	8777.37	19542.4	36941.3	1974.57	1634.12	1328.38	13195.9	3799.83	3386.54	29619.7	27443.6	26735.6	69154.2	48329.6	61257.7	HMDB11707	TG(51:2)	M+NH4	C54H100O6	37	0	-1.76861	87.0849		http://nonlinear.com/redirect/outbound?p=hmdb&param=HMDB11707
TG(51:3)	15.60_860.7684m/z		860.768	15.6011	1.01998e+06	0.23	443908	444358	442423	328078	327023	324442	497436	381768	292297	1.00614e+06	752162	621649	832956	920970	1.30602e+06	15778.1	15696.6	11991	95269.8	44305.8	42137.7	93704.4	94569.3	96695	705162	610788	795208	HMDB11708	TG(51:3)	M+NH4	C54H98O6	44.1	0	-1.46143	90.904	-0.1391
TG(51:4)	15.25_858.7531m/z		858.753	15.251	1.10384e+06	1.35	410583	421266	403966	312586	312313	319825	645374	581991	437648	359849	278119	229730	884945	1.02552e+06	1.40104e+06	4981.94	4267.7	3817.8	38754.9	22402.9	19943.9	61627.2	60290.8	67093	747709	631328	875807	HMDB43512	TG(51:4)	M+NH4	C54H96O6	41.2	0	-1.16991	86.0284	-0.2339
TG(51:5)	15.04_856.7367m/z		856.737	15.0357	1.75416e+06	1.26	805851	824886	808789	613491	602072	595899	1.17025e+06	1.35383e+06	982046	761939	597504	469040	1.31253e+06	1.5941e+06	2.11531e+06	6957.66	4964.3	5683.49	46484.3	27071.9	25244.4	276543	249175	283550	1.76688e+06	1.46277e+06	2.03283e+06	HMDB43715	TG(51:5)	M+NH4	C54H94O6	42	0	-1.26556	91.3934	-0.2476
TG(51:6)	14.67_854.7214m/z		854.721	14.6723	1.14146e+06	0.93	532453	559699	535385	401831	394466	398864	690459	918105	631186	638100	493880	370970	864494	1.01218e+06	1.35196e+06	3364.21	1737.29	2488.32	29503.4	14493.6	13897.2	222089	193947	227212	1.14542e+06	947719	1.33125e+06	LMGL03013395	TG(51:6)	M+NH4	C54H92O6	36.4	0	-2.19611	84.5103		http://nonlinear.com/redirect/outbound?p=lipidmaps&param=LMGL03013395
TG(51:7)	14.20_852.7060m/z		852.706	14.2006	537299	2.12	208736	216377	208487	158107	154938	147043	193637	236035	162966	131602	93930.1	63529.3	419518	528920	663459	814.521	229.818	454.973	6313.78	4426.11	3701.21	71371.7	58688	71801.4	478082	402851	558451	HMDB43778	TG(51:7)	M+NH4	C54H90O6	40.5	0	-1.15544	84.7911	-0.2487
TG(52:10)	13.34_860.6754m/z		860.675	13.342	1.89223e+06	3.47	439268	468395	443978	331031	326013	306110	210021	333899	229896	25468	18138.4	16009.1	452190	635077	749788	6482.48	6428	7458.5	10292.1	7982.88	9137.03	346129	247920	353568	1.75272e+06	1.5813e+06	2.34267e+06	HMDB48295	TG(52:10)	M+NH4	C55H86O6	37	0	-1.05106	86.3746		http://nonlinear.com/redirect/outbound?p=hmdb&param=HMDB48295
TG(52:2)a	15.75_890.8156m/z		890.816	15.7492	120129	1.98	74414.6	71756	72121.2	49656.4	52203.7	51164.9	26510.5	43414.2	44095.2	135074	111393	113920	41214.7	72323.6	90717.3	2530.29	2119.24	1609.1	18481.6	5420.08	4907.96	18715	17493.9	17349	106520	79313.2	103514	HMDB42515	TG(52:2)a	M+NH4	C56H104O6	37.4	0	-1.73694	89.0129		http://nonlinear.com/redirect/outbound?p=hmdb&param=HMDB42515
TG(52:2)b	15.98_862.7845m/z		862.784	15.9785	1.14051e+06	0.72	495281	494261	488688	384240	368333	362633	653731	459855	390043	1.41154e+06	1.04824e+06	961740	772570	852491	1.16034e+06	33042.3	32684.8	24423.3	108310	59000.8	55316.2	128505	129322	134725	658135	562333	742850	HMDB44305	TG(52:2)b	M+NH4	C54H100O6	45.3	0	-0.107611	92.3209	-0.1246
TG(52:3)	15.83_856.7501n	856.75	874.784	15.83	1.16455e+07	0.56	4.5761e+06	4.65191e+06	4.64183e+06	3.43428e+06	3.40479e+06	3.39872e+06	2.94987e+06	3.69557e+06	2.55219e+06	1.27761e+07	9.28981e+06	8.43533e+06	9.59422e+06	1.09704e+07	1.43717e+07	71001.3	62905.9	43885.8	919512	265586	245290	520866	494813	552935	6.16588e+06	5.33791e+06	7.22388e+06	HMDB44278	TG(52:3)	M+NH4, M+Na, M+K	C55H100O6	45.8	0	-0.610505	95.4041	-0.1252
TG(52:9)	13.81_844.6566n	844.657	862.69	13.808	9.46525e+06	1.97	2.58028e+06	2.69991e+06	2.60771e+06	1.86194e+06	1.87123e+06	1.80412e+06	2.0138e+06	3.32402e+06	2.19609e+06	87138.2	74055.5	44577.2	2.9309e+06	4.07677e+06	4.99943e+06	14659.4	9438.63	10335.1	21732.4	23444.3	33619.6	945526	709355	993648	9.21259e+06	7.78826e+06	1.13949e+07	LMGL03014833	TG(52:9)	M+NH4, M+Na	C55H88O6	38.2	0	-1.77626	92.9883		http://nonlinear.com/redirect/outbound?p=lipidmaps&param=LMGL03014833
TG(53:1)a	16.14_892.8315m/z		892.831	16.1406	82332.7	2.04	42401.5	41297.6	40739.2	28964.9	29783.3	28506.3	21237.9	29292.8	23904.9	89365	78693.9	78939.2	20942.4	40051.6	47694.4	1888.77	1565.58	1240.5	6221.23	2781.39	2379.74	12377.7	13088.5	15042.8	66812.9	57479.3	71324.6	HMDB43168	TG(53:1)a	M+NH4	C56H106O6	36.7	0	-1.49874	85.0656		http://nonlinear.com/redirect/outbound?p=hmdb&param=HMDB43168
TG(53:1)b	16.75_892.8320m/z		892.832	16.7541	373625	3.28	89517	89843	82932.9	66417.5	64515.2	62197.8	79638.9	51131.6	46243.8	68259	55886.8	54945.6	320653	333004	467219	10605.7	10056	6687.99	11247.8	11222.5	8840.42	27440.2	29481.5	29027.3	83287.5	73080.5	96333.3	HMDB43168	TG(53:1)b	M+NH4	C56H106O6	38.2	0	-0.874117	92.1878		http://nonlinear.com/redirect/outbound?p=hmdb&param=HMDB43168
TG(53:3)	16.05_888.7998m/z		888.8	16.0461	1.49447e+06	2.3	460959	466602	446184	342019	336850	323874	415812	276536	233392	809163	588695	537581	1.27059e+06	1.28624e+06	1.92658e+06	14765.3	14344.6	10667.2	98573	52050.2	50019.4	78669.9	79714.6	87280.1	589995	492410	663883	HMDB43310	TG(53:3)	M+NH4	C56H102O6	42.5	0	-0.389225	80.5753	-0.1377
TG(53:4)	15.72_886.7843m/z		886.784	15.7223	1.07422e+06	1.98	299966	310682	296379	231323	227606	211463	294908	232606	245417	307469	203080	174004	901454	953431	1.36776e+06	3477.73	2755.91	2702.15	45947.1	25172.3	23731.2	36851.5	35926.2	37359.3	418564	357499	501496	HMDB43687	TG(53:4)	M+NH4	C56H100O6	38.5	0	-1.73359	94.7422		http://nonlinear.com/redirect/outbound?p=hmdb&param=HMDB43687
TG(53:5)	15.53_866.7347n	866.735	884.769	15.5337	706292	3.25	339070	368879	362881	257024	298659	312763	917821	809634	391420	569607	461395	422675	423981	460753	556354	2970.91	2812.95	2806.63	41417	18089.1	20142.2	107955	111614	122053	657859	583578	635183	HMDB43694	TG(53:5)	M+NH4, M+Na	C56H98O6	36.7	0	-1.86237	85.8492		http://nonlinear.com/redirect/outbound?p=hmdb&param=HMDB43694
TG(53:6)	15.10_864.7183n	864.718	882.752	15.103	3.87541e+06	1.09	1.71307e+06	1.74806e+06	1.71852e+06	1.36897e+06	1.29207e+06	1.30323e+06	2.72466e+06	2.86067e+06	2.41038e+06	2.25096e+06	1.61818e+06	1.40281e+06	3.02384e+06	3.71015e+06	4.89225e+06	18161.5	17257.5	14019.1	157910	82717.8	76515.1	575418	518857	570031	3.24253e+06	2.64125e+06	3.75408e+06	HMDB43773	TG(53:6)	M+NH4, M+Na	C56H96O6	41.7	0	-1.9609	83.7324	-0.1669
TG(53:7)	14.74_880.7369m/z		880.737	14.7396	1.45111e+06	0.78	617436	650278	625666	472356	465832	471948	740049	854193	611167	760217	591094	447868	1.14306e+06	1.36126e+06	1.84901e+06	6201.68	6042.18	4947.23	58949.7	29026.8	27305.8	209721	178685	204922	1.27584e+06	1.09967e+06	1.52249e+06	HMDB43779	TG(53:7)	M+NH4	C56H94O6	36.3	0	-2.27769	83.9694		http://nonlinear.com/redirect/outbound?p=hmdb&param=HMDB43779
TG(53:8)	14.32_878.7209m/z		878.721	14.322	1.34274e+06	1.95	426089	438724	422918	319707	305725	296589	338317	397628	280232	143932	104932	86875.7	1.04014e+06	1.32046e+06	1.66762e+06	16913.5	23835.4	11071.9	21398.9	17649.9	13489.8	127539	102714	86131.4	911424	775622	1.09798e+06	HMDB43680	TG(53:8)	M+NH4	C56H92O6	41.8	0	-1.80896	93.5992	-0.2755
TG(54:1)	16.93_906.8477m/z		906.848	16.9329	202725	2.03	81216.9	83316.2	77659.2	61946.6	59535.8	60307.6	88226.2	101233	72828.8	75283.2	58703.8	58587.5	148543	222203	237428	16285.4	16366.8	11674.5	15199.4	16059.6	13036.4	40359.3	43779.3	43117.7	150102	140857	188948	HMDB10433	TG(54:1)	M+NH4	C57H108O6	45	0	-0.921294	93.2971	-0.1418
TG(54:2)	16.80_918.8474m/z		918.847	16.7954	503221	4.26	103881	108071	99228.8	81867.6	77008.5	75248.2	97172.7	56108.4	48037.5	78616.4	62239.1	62279.4	429181	444693	635789	6591.85	6520.97	4604.79	15136.4	11707	10835.9	24374.9	26452.8	27086.9	98787.6	91380.6	120185	HMDB42516	TG(54:2)	M+NH4	C58H108O6	45.6	0	-0.859857	91.8446	-0.1163
TG(54:3)	16.25_884.7817n	884.782	902.815	16.2487	8.65723e+06	0.64	2.49083e+06	2.66472e+06	2.57241e+06	1.90053e+06	1.90612e+06	1.88289e+06	1.27838e+06	1.49558e+06	1.09161e+06	5.53823e+06	3.87314e+06	3.80485e+06	7.0424e+06	8.53605e+06	1.03932e+07	68409.1	74789	40834.1	497277	191509	176246	334525	316923	343377	2.96341e+06	2.60481e+06	3.46273e+06	HMDB46267	TG(54:3)	M+NH4, M+Na, M+K	C57H104O6	38.7	0	-1.8485	95.9215		http://nonlinear.com/redirect/outbound?p=hmdb&param=HMDB46267
TG(54:5)	15.75_898.7839m/z		898.784	15.7492	2.5291e+07	1.38	7.19299e+06	7.46612e+06	7.22376e+06	5.44656e+06	5.47511e+06	5.33325e+06	6.92623e+06	9.01274e+06	6.16397e+06	8.79438e+06	6.60119e+06	6.10195e+06	2.04757e+07	2.4152e+07	3.12452e+07	57972.1	61361.3	35564.5	685877	349220	297295	760833	731613	771911	9.3119e+06	8.08441e+06	1.09276e+07	HMDB46858	TG(54:5)	M+NH4	C57H100O6	34.4	0	-2.22645	74.7676		http://nonlinear.com/redirect/outbound?p=hmdb&param=HMDB46858
TG(54:6)	15.43_878.7332n	878.733	896.767	15.426	3.16572e+07	1.11	1.32075e+07	1.35857e+07	1.34875e+07	9.96949e+06	1.00586e+07	1.01925e+07	1.15121e+07	1.60948e+07	1.15582e+07	2.66313e+07	1.95188e+07	1.74482e+07	2.42339e+07	3.15229e+07	3.92147e+07	73525.8	50349.6	42513.8	1.32933e+06	499404	452035	2.27593e+06	2.16588e+06	2.34073e+06	2.20242e+07	1.87429e+07	2.5579e+07	HMDB44613	TG(54:6)	M+NH4, M+Na, M+K	C57H98O6	37.5	0	-3.56783	91.7489		http://nonlinear.com/redirect/outbound?p=hmdb&param=HMDB44613
TG(54:9)	14.39_872.6868n	872.687	890.721	14.3894	2.96152e+07	0.84	9.56398e+06	1.00235e+07	9.84469e+06	6.97608e+06	6.92091e+06	6.85937e+06	5.93269e+06	1.01428e+07	6.93947e+06	1.08456e+06	872166	575094	2.24506e+07	2.96968e+07	3.66981e+07	34484.5	7918.92	8713.59	99577.3	137067	123205	1.92997e+06	1.58129e+06	1.88815e+06	2.37361e+07	2.0033e+07	2.85825e+07	HMDB49000	TG(54:9)	M+NH4, M+Na, M+K	C57H92O6	43.3	0	-1.79367	92.6799	-0.1677
TG(55:10)	14.32_902.7213m/z		902.721	14.322	1.18903e+06	2.49	398738	418392	404306	298519	287424	279432	294895	467261	307840	311322	219276	159886	525067	694912	860750	1484.42	317.121	567.62	9855.38	6050.28	7152.52	180102	146676	175994	1.17558e+06	992678	1.39883e+06	HMDB43683	TG(55:10)	M+NH4	C58H92O6	41.5	0	-1.21711	84.4614	-0.1812
TG(55:2)	16.59_886.7979n	886.798	904.832	16.5894	2.96603e+06	0.76	944629	994598	948413	708451	718971	715911	671001	738633	500296	1.90108e+06	1.41102e+06	1.43431e+06	2.32012e+06	2.9463e+06	3.63167e+06	29964.1	28593.1	18023.1	112759	55284.3	51144.3	170675	177734	198418	1.29972e+06	1.19589e+06	1.57237e+06	HMDB45516	TG(55:2)	M+NH4, M+Na	C57H106O6	45.3	0	-0.93968	95.8972	-0.1468
TG(55:3)	16.52_916.8315m/z		916.831	16.5211	981246	0.42	223221	230107	221457	164150	163620	162775	163776	120279	95510.7	214027	159311	155450	830131	868734	1.24487e+06	5968.37	5309.13	4114.28	40236.6	24190.5	23283.3	31522.8	32767.1	38235.6	242178	211143	281716	HMDB46299	TG(55:3)	M+NH4	C58H106O6	47.7	0	0.311337	88.6106	-0.0666
TG(55:4)	16.17_914.8135m/z		914.814	16.1676	1.06429e+06	1.87	247972	255504	246955	184386	182143	172423	237737	173209	166079	183971	136317	131063	907869	903478	1.38153e+06	2674.6	2457.71	2207.32	42804.2	24561.1	22281.8	28549.3	28406.4	32929	282487	254118	335130	HMDB43514	TG(55:4)	M+NH4	C58H104O6	36.6	0	-4.03158	87.7638		http://nonlinear.com/redirect/outbound?p=hmdb&param=HMDB43514
TG(55:5)	15.37_912.7998m/z		912.8	15.3721	156528	1.48	92511.3	89896.1	91819.5	64171.2	61478.6	65768.1	65937.9	100156	135045	64662.3	60916.6	63427.2	49576.9	74229.2	125108	1451.47	1038.49	1173.54	10785.4	5255.89	5314.31	32787.8	34028.9	31399.3	175897	126279	167409	HMDB43717	TG(55:5)	M+NH4	C58H102O6	36.3	0	-1.81071	83.8939		http://nonlinear.com/redirect/outbound?p=hmdb&param=HMDB43717
TG(55:6)	15.59_910.7829m/z		910.783	15.5876	3.26616e+06	1.91	1.11786e+06	1.14677e+06	1.1031e+06	872221	855842	839507	1.64131e+06	1.35972e+06	1.04927e+06	1.13866e+06	792805	722529	2.67036e+06	2.9857e+06	4.14241e+06	8237.14	7528.81	8072.92	164307	90726.4	90701.2	261254	253924	275288	1.87133e+06	1.57367e+06	2.17303e+06	HMDB43774	TG(55:6)	M+NH4	C58H100O6	35.8	0	-3.22677	82.8527		http://nonlinear.com/redirect/outbound?p=hmdb&param=HMDB43774
TG(55:7)a	14.47_908.7682m/z		908.768	14.4703	131059	2.99	85172.1	87374.6	91718.4	65133.6	61353.5	63279.1	64940.1	103977	123938	121152	92124.1	76793.4	45680	96636.1	134358	1010.57	545.172	388.45	8265.82	3053.67	2921.86	50685.4	41949.7	42178.8	146488	104378	142312	LMGL03010543	TG(55:7)a	M+NH4	C58H98O6	37.4	0	-2.21558	89.4198		http://nonlinear.com/redirect/outbound?p=lipidmaps&param=LMGL03010543
TG(55:7)b	15.22_908.7673m/z		908.767	15.2241	2.22668e+06	0.39	804433	838898	823296	602236	600486	597602	779824	757976	561569	831113	588105	516770	1.77913e+06	2.07313e+06	2.82777e+06	4071.1	2920.42	3112.29	114058	59573.2	58286.1	181359	171644	179892	1.61267e+06	1.35633e+06	1.89422e+06	HMDB43780	TG(55:7)b	M+NH4	C58H98O6	39.4	0	-1.46466	82.0851	-0.3145
TG(55:8)	14.86_906.7526m/z		906.753	14.8608	1.67455e+06	1.96	565142	588420	561408	415011	404341	399447	466714	538404	410017	312710	227243	186200	1.30609e+06	1.58808e+06	2.12946e+06	2107.19	1006.72	1092.85	41786.4	26158.8	22464.8	88093.1	77674	83210.3	1.12718e+06	958888	1.34644e+06	HMDB43709	TG(55:8)	M+NH4	C58H96O6	36.4	0	-2.18256	84.5381		http://nonlinear.com/redirect/outbound?p=hmdb&param=HMDB43709
TG(55:9)	14.58_904.7363m/z		904.736	14.5781	1.80055e+06	2.02	669617	707915	670101	492244	474186	477085	564282	743749	537836	234727	173617	135461	1.26115e+06	1.61234e+06	2.15674e+06	2682.6	1220.79	1165.75	18904.8	14391.4	13917.5	117939	101565	111925	1.78711e+06	1.49367e+06	2.12087e+06	HMDB43682	TG(55:9)	M+NH4	C58H94O6	43.2	0	-2.21704	90.4587	-0.154
TG(56:1)	16.53_860.7825n	860.782	878.816	16.5347	1.14674e+06	0.75	581175	602025	582466	434865	440122	440972	550538	624280	422303	1.26265e+06	939976	967957	790907	1.06163e+06	1.27721e+06	38476.7	39109.8	24245.6	60332.3	40463.1	39393.1	149488	161705	180352	1.08587e+06	1.00363e+06	1.35073e+06	HMDB05361	TG(56:1)	M+NH4, M+Na	C55H104O6	44.7	0	0.203324	94.2482	-0.1611
TG(56:10)a	14.61_898.7030n	898.703	916.737	14.605	2.40291e+07	0.52	1.10007e+07	1.15899e+07	1.13378e+07	8.38813e+06	8.39944e+06	8.4685e+06	1.37521e+07	2.57372e+07	1.8902e+07	1.28378e+07	9.18017e+06	7.92633e+06	1.48989e+07	1.93323e+07	2.54486e+07	45951.6	16886.7	19426	375999	165726	172644	3.49664e+06	2.87693e+06	3.28742e+06	2.37169e+07	1.99454e+07	2.8425e+07	HMDB49044	TG(56:10)a	M+NH4, M+Na, M+K	C59H94O6	44.2	0	-0.188756	95.9939	-0.1809
TG(56:10)b	15.80_930.7586m/z		930.759	15.8031	198677	3.28	93879.6	101249	98801.9	68275.9	71571	72768.7	86364.7	155715	130022	150710	74826.4	78296.6	148982	193445	253604	442.898	152.022	288.194	13315.1	5507.41	5251.28	20772.9	18045.5	21003.1	137480	127453	156702	HMDB55448	TG(56:10)b	M+NH4	C60H96O6	31.5	0	4.46441	62.821		http://nonlinear.com/redirect/outbound?p=hmdb&param=HMDB55448
TG(56:11)	14.12_896.6870n	896.687	914.721	14.1196	1.38313e+07	0.99	5.57707e+06	5.88568e+06	5.7653e+06	4.40222e+06	4.42664e+06	4.34254e+06	7.6359e+06	1.43463e+07	1.05817e+07	5.4876e+06	3.93514e+06	3.07077e+06	5.91178e+06	7.26807e+06	9.67461e+06	25800.6	11619.8	13792.6	171876	69264.8	73788.8	3.43984e+06	2.76597e+06	3.30267e+06	1.35046e+07	1.15198e+07	1.64696e+07	HMDB42927	TG(56:11)	M+NH4, M+Na, M+K	C59H92O6	38.4	0	-2.67443	95.0908		http://nonlinear.com/redirect/outbound?p=hmdb&param=HMDB42927
TG(56:2)	16.96_932.8631m/z		932.863	16.9604	515981	3.15	145508	151655	141561	114664	108723	108541	166781	182172	113106	161584	116845	119103	408246	493832	645865	10393.6	10135.5	7036.74	19419.9	14578.4	12896	47508.6	50946.7	54675.8	230585	220447	291365	HMDB44868	TG(56:2)	M+NH4	C59H110O6	45.1	0	-0.888121	93.2925	-0.1413
TG(56:3)a	16.64_912.8132n	912.813	930.847	16.6441	3.59327e+06	1.41	834780	880849	832689	631500	632938	616917	439195	481682	307984	1.23528e+06	888760	902690	2.86842e+06	3.57023e+06	4.34115e+06	10067.4	8258.44	6367.22	126467	58554.5	57519	95798.8	95572.4	111198	941511	877325	1.13825e+06	HMDB47022	TG(56:3)a	M+NH4, M+Na	C59H108O6	46.2	0	-0.870212	95.3856	-0.1191
TG(56:3)b	16.85_944.8628m/z		944.863	16.8504	433099	3.99	73320.5	78190.1	71793.4	57848.6	54069.7	53986.1	43044.5	22750.3	18640.3	45764.1	32912.8	33561.6	374318	374854	550124	2087.19	2169.29	1615.05	10914.4	7895.84	8242.36	11064	11159.9	12051.4	60040.4	58189.4	74763.6	HMDB46634	TG(56:3)b	M+NH4	C60H110O6	45.3	0	-0.782812	83.3955	-0.0884
TG(56:4)	16.32_910.7966n	910.797	928.83	16.3165	5.95902e+06	0.32	1.33299e+06	1.4274e+06	1.35043e+06	999691	1.00218e+06	995905	705561	826228	565459	1.4366e+06	1.03853e+06	1.0467e+06	5.04952e+06	5.54713e+06	7.28041e+06	8587.26	7964.53	5777.07	183133	91018.5	84605.8	107957	103479	119928	1.54167e+06	1.40369e+06	1.8478e+06	HMDB44418	TG(56:4)	M+NH4, M+Na	C59H106O6	37.8	0	-2.59669	92.1725		http://nonlinear.com/redirect/outbound?p=hmdb&param=HMDB44418
TG(56:5)a	15.97_932.7812n	932.781	950.815	15.965	1.60595e+07	1.55	4.20043e+06	4.45583e+06	4.29217e+06	3.20338e+06	3.21316e+06	3.12345e+06	3.19665e+06	4.02463e+06	2.95418e+06	3.98461e+06	2.78185e+06	2.74406e+06	1.34123e+07	1.51464e+07	1.96197e+07	17446.6	13912.8	13624.2	702115	347190	332703	715953	708563	779030	5.79285e+06	4.98583e+06	6.65326e+06	HMDB46958	TG(56:5)	M+NH4, M+Na	C61H104O6	39.7	0	-1.02002	77.4255	-0.2323
TG(56:5)b	16.44_954.8439m/z		954.844	16.4389	3.81672e+06	2.55	792787	842407	786888	599215	593491	570821	553866	653620	461260	496691	350921	353235	3.32025e+06	3.44686e+06	4.68304e+06	4301.72	4070.15	4036.29	97430.1	56313.6	50161	72889.8	70876.8	76816.1	855243	772080	1.00106e+06	HMDB46783	TG(56:5)	M+NH4	C61H108O6	35.9	0	-4.78642	85.0364		http://nonlinear.com/redirect/outbound?p=hmdb&param=HMDB46783
TG(56:7)	15.63_904.7488n	904.749	922.783	15.628	3.63531e+07	0.12	1.04172e+07	1.08331e+07	1.04507e+07	7.78894e+06	7.77239e+06	7.77279e+06	7.27641e+06	1.01066e+07	7.39637e+06	1.23377e+07	8.40389e+06	7.84748e+06	2.89176e+07	3.47668e+07	4.53749e+07	41118.8	23415.8	23386.6	1.35384e+06	649889	577970	1.44926e+06	1.34673e+06	1.45377e+06	1.53551e+07	1.29417e+07	1.76513e+07	HMDB44620	TG(56:7)	M+NH4, M+Na, M+K	C59H100O6	42.8	0	-1.43512	83.8497	-0.1391
TG(56:8)	15.45_934.7834m/z		934.783	15.4529	682272	0.24	178827	191575	183005	137922	141485	148599	249198	231759	229504	60132.7	42120.9	38236.3	504492	640361	901963	798.539	542.4	477.758	33326.4	19779.4	19358.6	22385.6	22293.8	22294.7	255707	193451	266886	HMDB52584	TG(56:8)	M+NH4	C60H100O6	36.1	0	-2.61177	83.4765		http://nonlinear.com/redirect/outbound?p=hmdb&param=HMDB52584
TG(56:9)	14.94_900.7186n	900.719	918.752	14.9415	3.07877e+07	0.52	1.054e+07	1.07886e+07	1.05501e+07	7.95605e+06	7.98117e+06	7.90012e+06	1.4414e+07	2.43718e+07	1.83681e+07	7.14046e+06	5.1268e+06	4.40611e+06	2.32608e+07	2.99937e+07	3.91087e+07	39176.7	14401.2	18089.4	469939	319951	240835	1.0904e+06	945268	1.02366e+06	1.56637e+07	1.32741e+07	1.8814e+07	HMDB44634	TG(56:9)	M+NH4, M+Na, M+K	C59H96O6	36.8	0	-2.3407	86.687		http://nonlinear.com/redirect/outbound?p=hmdb&param=HMDB44634
TG(57:11)	14.31_928.7367m/z		928.737	14.3085	1.3274e+06	1.53	471609	500441	472712	354020	348384	343336	353512	579436	375123	294788	202518	158952	1.02301e+06	1.29226e+06	1.66694e+06	1831.91	505.049	667.586	18103.7	11892.8	9738.77	163950	137655	151245	1.05235e+06	877050	1.23087e+06	HMDB43741	TG(57:11)	M+NH4	C60H94O6	36.2	0	-2.34104	83.6009		http://nonlinear.com/redirect/outbound?p=hmdb&param=HMDB43741
TG(57:4)	16.58_942.8468m/z		942.847	16.5757	839430	1.46	151100	157664	147033	108632	109328	106322	64623.8	37576.7	32469.8	69348.4	51324.3	49739.6	724890	731640	1.06176e+06	4110.91	3519.94	2726.23	17474.8	13457.8	13401.6	13337.1	13785.3	16973.7	109458	102246	130592	HMDB43515	TG(57:4)	M+NH4	C60H108O6	48.9	0	0.105862	93.9452	-0.0661
TG(57:6)	16.02_938.8154m/z		938.815	16.0191	2.05835e+06	3.07	493561	515557	482344	373024	373447	353745	511533	414481	327617	271744	200794	187444	1.69323e+06	1.8022e+06	2.67961e+06	3452.37	3686.7	3618.83	91730.3	52551.4	48495.8	90606.5	90615.1	101142	567347	487055	662042	HMDB43775	TG(57:6)	M+NH4	C60H104O6	42.4	0	0.172061	85.2043	-0.1782
TG(57:7)	15.74_936.7982m/z		936.798	15.7357	2.28685e+06	2.84	586116	615282	585886	449685	426343	415821	422297	397169	310100	312524	222028	191438	1.82551e+06	2.13072e+06	2.90433e+06	2539.47	1852.99	2356.03	94693.1	58282	59849.8	99585.5	91393.2	93296.7	857084	713882	990881	HMDB43733	TG(57:7)	M+NH4	C60H102O6	41.5	0	-2.14674	88.3855	-0.2329
TG(57:9)	15.12_932.7680m/z		932.768	15.1165	2.89906e+06	2.45	828603	858573	819445	640715	614913	595804	1.1013e+06	1.31061e+06	1.05494e+06	337588	243663	217553	2.26453e+06	2.79869e+06	3.63396e+06	3066.61	1015.99	1584.03	54626.1	40823.8	31034.5	98684.2	90057.9	93531.8	1.18162e+06	1.00254e+06	1.40303e+06	LMGL03011232	TG(57:9)	M+NH4	C60H98O6	35.1	0	-2.35768	78.2317		http://nonlinear.com/redirect/outbound?p=lipidmaps&param=LMGL03011232
TG(58:10)	14.97_926.7336n	926.734	944.767	14.9684	2.58486e+07	0.06	7.14918e+06	7.38953e+06	7.13368e+06	5.36094e+06	5.35476e+06	5.35965e+06	7.08606e+06	1.08924e+07	8.28338e+06	4.96217e+06	3.46713e+06	3.14845e+06	1.98039e+07	2.57249e+07	3.20169e+07	25832.3	10583.2	11104.7	438411	282629	179487	1.06496e+06	932297	975357	8.38913e+06	6.99151e+06	9.8178e+06	LMGL03016444	TG(58:10)	M+NH4, M+Na, M+K	C61H98O6	37.8	0	-2.96193	92.5986		http://nonlinear.com/redirect/outbound?p=lipidmaps&param=LMGL03016444
TG(58:11)a	14.67_924.7176n	924.718	942.751	14.6723	2.84335e+07	1.05	8.87477e+06	9.26821e+06	9.08482e+06	6.41797e+06	6.45268e+06	6.54866e+06	5.84116e+06	8.91442e+06	6.66228e+06	7.15911e+06	4.94233e+06	4.39578e+06	2.20721e+07	2.76288e+07	3.55995e+07	34646.4	12047.9	12288.8	492062	273742	207680	2.16364e+06	1.86698e+06	1.97232e+06	1.54848e+07	1.29354e+07	1.85476e+07	HMDB49595	TG(58:11)a	M+NH4, M+Na, M+K	C61H96O6	41	0	-1.47407	90.5633	-0.3153
TG(58:11)b	14.98_956.7676m/z		956.768	14.9819	1.77305e+06	1.8	653802	685130	649519	480015	465433	465275	494984	663627	489235	235456	168324	149489	1.34674e+06	1.71202e+06	2.26039e+06	2210.98	746.586	960.175	44620.9	30202.5	27226.2	187288	163705	172292	1.43645e+06	1.20466e+06	1.71272e+06	HMDB52763	TG(58:11)b	M+NH4	C62H98O6	35.7	0	-2.75488	81.6999		http://nonlinear.com/redirect/outbound?p=hmdb&param=HMDB52763
TG(58:13)	13.86_920.6876n	920.688	938.721	13.8623	1.14778e+07	1.7	2.62083e+06	2.67797e+06	2.59014e+06	1.85324e+06	1.85959e+06	1.7967e+06	1.11491e+06	1.91394e+06	1.2676e+06	76965.9	58204.8	36513.1	8.66733e+06	1.11301e+07	1.46359e+07	8182.75	1398.01	1526.64	21542.8	43227.8	18752.1	307717	236225	313212	4.3267e+06	3.77601e+06	5.39593e+06	LMGL03016523	TG(58:13)	M+NH4, M+Na	C61H92O6	38.9	0	-1.9248	97.0053		http://nonlinear.com/redirect/outbound?p=lipidmaps&param=LMGL03016523
TG(58:2)	16.99_958.8785m/z		958.879	16.9879	743603	2.18	148126	156316	146206	115033	112613	110128	108868	100178	64207	147454	101729	113396	611816	696752	922241	3847.65	3896.2	2714.51	21394.8	13867.5	13546.8	28436.6	29512.8	31669.8	189366	183871	229869	HMDB05457	TG(58:2)	M+NH4	C61H112O6	45	0	-0.77462	92.9027	-0.1409
TG(58:4)	16.75_956.8625m/z		956.862	16.7541	2.35748e+06	3.99	450878	479452	445328	344179	336670	317408	172989	181520	112941	360752	264630	287846	1.97798e+06	2.23544e+06	2.85901e+06	2905.18	2657.63	2133.58	56882	33814.9	35190.7	38102.6	37656.2	42740.5	487201	477406	596111	HMDB05401	TG(58:4)	M+NH4	C61H110O6	48.3	0	0.647209	95.1291	-0.0765
TG(58:5)	15.32_928.7495n	928.749	946.783	15.3183	1.72558e+07	0.95	4.32646e+06	4.49411e+06	4.48556e+06	3.36989e+06	3.41914e+06	3.43096e+06	4.94012e+06	7.74187e+06	6.01443e+06	1.42467e+06	994061	960070	1.3778e+07	1.62411e+07	2.17482e+07	13920.1	6426.83	6857.22	351123	242024	177991	398978	365683	378092	5.08874e+06	4.30246e+06	5.92092e+06	HMDB05463	TG(58:5)	M+NH4, M+Na	C61H100O6	37.9	0	-2.69364	92.7349		http://nonlinear.com/redirect/outbound?p=hmdb&param=HMDB05463
TG(58:8)	15.68_930.7654n	930.765	948.799	15.6819	1.89165e+07	0.9	4.43734e+06	4.78854e+06	4.53336e+06	3.35801e+06	3.38295e+06	3.32302e+06	2.88432e+06	4.22156e+06	3.22363e+06	1.6712e+06	1.25067e+06	1.17334e+06	1.53011e+07	1.82834e+07	2.31649e+07	17081	10357.6	8311.47	579103	366377	328618	522219	482723	511324	5.92037e+06	4.9822e+06	6.76458e+06	HMDB46875	TG(58:8)	M+NH4, M+Na	C61H102O6	38.1	0	-2.42723	93.4157		http://nonlinear.com/redirect/outbound?p=hmdb&param=HMDB46875
TG(59:0)	16.29_838.7849m/z		838.785	16.2894	180573	1.83	113957	110646	110225	84696.9	82001.6	79955.5	173646	115482	117159	173000	131946	136095	102161	124875	175754	28667.8	29588.4	21659.5	36684.4	29696.1	27046.7	62159.4	66148.6	60228.2	195564	149703	196450	HMDB42095	TG(59:0)	M+NH4	C52H100O6	50.9	0	-0.843275	94.1618	-0.0424
TG(59:12)	14.55_954.7522m/z		954.752	14.5511	544806	0.42	202503	211209	205537	143187	142730	143930	96451	122919	89816.3	54459.3	38792.5	32115.4	423789	497746	712882	346.442	55.983	63.8726	14459.3	9812.46	8814.03	54991.1	47109.6	49187.3	505634	412247	593343	HMDB43799	TG(59:12)	M+NH4	C62H96O6	40.2	0	-0.935087	82.6468	-0.2483
TG(59:9)	15.52_960.7978m/z		960.798	15.5202	1.12169e+06	2.6	289443	300987	286648	227313	214910	222837	388517	478429	364065	51253.4	32992.7	33770.9	926343	989012	1.44971e+06	635.087	276.715	457.34	27375.2	18899.9	16624.5	36186.8	33740.1	33555.1	367720	298919	422504	HMDB43595	TG(59:9)	M+NH4	C62H102O6	34.8	0	-3.90273	78.5514		http://nonlinear.com/redirect/outbound?p=hmdb&param=HMDB43595
TG(60:10)a	14.78_930.7522m/z		930.752	14.78	2.46625e+06	0.36	979887	996625	975050	718267	713981	713748	984926	1.39699e+06	1.03418e+06	533894	410100	319420	1.84156e+06	2.41812e+06	3.13906e+06	3882.07	1538.33	1435.08	36467	24451.5	23140	317972	269056	293654	2.08707e+06	1.72639e+06	2.44775e+06	HMDB53481	TG(60:10)a	M+NH4	C60H96O6	37.5	0	-2.57234	90.3634		http://nonlinear.com/redirect/outbound?p=hmdb&param=HMDB53481
TG(60:10)b	15.48_954.7653n	954.765	972.799	15.4798	1.0689e+07	1.94	2.46905e+06	2.61669e+06	2.51992e+06	1.88312e+06	1.91501e+06	1.95743e+06	2.66812e+06	4.02348e+06	3.18605e+06	1.58613e+06	1.05011e+06	1.051e+06	8.80189e+06	9.53591e+06	1.37293e+07	8184.56	4619.84	4692.36	213615	133284	96605.6	360006	341405	333357	2.16266e+06	1.76361e+06	2.39257e+06	HMDB50232	TG(60:10)b	M+NH4, M+Na	C63H102O6	38.2	0	-2.42485	94.1238		http://nonlinear.com/redirect/outbound?p=hmdb&param=HMDB50232
TG(60:11)	15.16_952.7496n	952.75	970.783	15.1568	1.05292e+07	1.08	2.81038e+06	2.95527e+06	2.86277e+06	2.1091e+06	2.09699e+06	2.14102e+06	1.91192e+06	2.7093e+06	2.15477e+06	1.31177e+06	847990	868759	8.40938e+06	9.99762e+06	1.31806e+07	10049.8	5053.24	4358.75	297193	194938	160791	662779	587912	625226	4.07322e+06	3.31787e+06	4.57225e+06	HMDB44638	TG(60:11)	M+NH4, M+Na	C63H100O6	37.6	0	-2.4689	91.1546		http://nonlinear.com/redirect/outbound?p=hmdb&param=HMDB44638
TG(60:12)a	14.87_950.7340n	950.734	968.768	14.8742	4.97156e+06	1.57	1.96025e+06	1.99904e+06	1.93356e+06	1.43379e+06	1.42422e+06	1.39134e+06	2.00086e+06	3.0412e+06	2.73143e+06	646924	512813	446782	4.10562e+06	4.63617e+06	6.17289e+06	7833.97	3374.1	3667.06	232171	153149	126091	415713	351292	365186	3.80349e+06	3.21436e+06	4.64221e+06	HMDB54868	TG(60:12)a	M+NH4, M+Na	C63H98O6	38.1	0	-2.49921	93.4609		http://nonlinear.com/redirect/outbound?p=hmdb&param=HMDB54868
TG(60:12)b	15.88_962.8139m/z		962.814	15.884	1.58521e+06	1.2	385262	390978	381823	293695	283798	267900	269847	269755	217029	89358.6	58861.4	60819.1	1.34527e+06	1.4223e+06	1.98806e+06	1178.57	823.548	1197.35	65529.6	43253.3	40971.4	59155	57371	60248.6	567391	469954	641691	HMDB50800	TG(60:12)b	M+NH4	C62H104O6	41.6	0	-1.1403	81.0448	-0.1653
TG(60:13)a	14.51_948.7184n	948.718	966.752	14.5107	4.30249e+06	0.51	1.36461e+06	1.48475e+06	1.43505e+06	1.12636e+06	1.12403e+06	1.11557e+06	3.08361e+06	5.27414e+06	4.54973e+06	507405	364486	305150	2.31687e+06	2.53086e+06	3.62316e+06	6358.9	3314.22	3803.77	97582.1	57447.2	44210.6	219911	185308	196626	2.27979e+06	1.94983e+06	2.73844e+06	HMDB53220	TG(60:13)a	M+NH4, M+Na	C63H96O6	38.4	0	-2.41996	94.6685		http://nonlinear.com/redirect/outbound?p=hmdb&param=HMDB53220
TG(60:13)b	14.66_980.7677m/z		980.768	14.6588	428104	1.46	104253	111080	103755	75397	74315.5	73220.4	63671	80653.9	78071.2	1517.5	1523.94	1477.43	344595	385368	554350	15.73	33.5008	29.6226	6775.21	5465.06	4042.19	11540.5	9963.81	9125.17	145937	106721	167181	HMDB52799	TG(60:13)b	M+NH4	C64H98O6	35.4	0	-2.59171	80.1728		http://nonlinear.com/redirect/outbound?p=hmdb&param=HMDB52799
TG(60:14)	14.13_946.7027n	946.703	964.737	14.1331	4.37502e+06	0.9	1.28234e+06	1.38388e+06	1.3471e+06	1.08145e+06	1.08419e+06	1.06616e+06	3.16146e+06	5.5326e+06	4.43099e+06	1.23363e+06	865279	704876	1.58054e+06	1.82325e+06	2.33844e+06	9553.19	5815.01	6497.69	56507.3	27088.7	21310.4	239397	199288	237458	2.32248e+06	1.98544e+06	2.82807e+06	LMGL03016637	TG(60:14)	M+NH4, M+Na	C63H94O6	44.9	0	-1.22022	96.5813	-0.141
TG(60:15)	13.77_944.6874n	944.687	962.721	13.7671	3.70221e+06	1.39	1.15518e+06	1.25095e+06	1.17226e+06	876004	885293	861254	1.28129e+06	2.31407e+06	1.69398e+06	1.14543e+06	741645	561049	621609	766501	945899	13518.8	10115.2	10267.1	42327.7	16244	19453	669820	508331	695976	3.55124e+06	3.1327e+06	4.42269e+06	HMDB55527	TG(60:15)	M+NH4, M+Na	C63H92O6	44.2	0	-1.39197	97.5554	-0.1682
TG(60:4)	17.04_984.8941m/z		984.894	17.0429	510133	3.8	86068.2	92743.9	88470.6	69550.6	66219.2	63558.6	50570.8	47327.6	30116.1	56771.1	36957.6	47749.8	441180	463665	625555	1343.56	1157.99	903.878	12432.7	8352.59	9606.08	11262.3	11725.4	12333.3	107430	108127	125535	HMDB05416	TG(60:4)	M+NH4	C63H114O6	45	0	-0.541984	92.315	-0.1402
TG(60:6)	16.63_980.8598m/z		980.86	16.6304	2.31416e+06	2.82	498458	527025	497444	388118	382219	367370	461751	569252	364356	332276	226605	248814	2.05028e+06	2.12965e+06	2.76255e+06	3388.49	3320	3186.42	79436.4	46522.1	45138.7	72280.4	69572.8	79005.9	574711	541534	686405	HMDB46574	TG(60:6)	M+NH4	C63H110O6	34.1	0	-4.45713	75.624		http://nonlinear.com/redirect/outbound?p=hmdb&param=HMDB46574
TG(60:8)a	13.58_818.6415n	818.641	836.675	13.5757	3.35659e+06	2.56	1.06018e+06	1.11842e+06	1.08503e+06	782607	777243	746130	507665	846224	466084	24059.9	21022.4	13352.6	2.32204e+06	3.6632e+06	3.87273e+06	3930.15	1219.55	1639.3	6009.99	10875	9944.46	184770	131801	196034	3.26495e+06	2.71856e+06	4.08625e+06	HMDB48368	TG(60:8)a	M+NH4, M+Na	C53H86O6	44.1	0	-1.07486	95.5083	-0.1553
TG(60:8)b	16.11_958.7968n	958.797	976.831	16.1137	9.88554e+06	2.07	2.15895e+06	2.30172e+06	2.15761e+06	1.59856e+06	1.61144e+06	1.54923e+06	992910	1.28366e+06	995655	834080	579028	646115	8.29076e+06	9.18506e+06	1.21808e+07	8041.5	6073.15	6174.39	277360	170303	158143	276764	273545	298446	2.87241e+06	2.46652e+06	3.24965e+06	HMDB46924	TG(60:8)b	M+NH4, M+Na	C63H106O6	43.6	0	0.197598	85.7409	-0.1374
TG(60:9)	15.82_956.7811n	956.781	974.815	15.8165	9.21114e+06	1.61	2.0572e+06	2.17135e+06	2.10692e+06	1.56222e+06	1.57998e+06	1.53062e+06	1.90818e+06	2.79882e+06	2.32659e+06	504100	346275	359387	8.08427e+06	8.09137e+06	1.14578e+07	6760.37	4976.56	4156.09	166152	120271	100286	196691	186754	189755	2.10226e+06	1.78968e+06	2.48636e+06	HMDB46925	TG(60:9)	M+NH4, M+Na	C63H104O6	38.2	0	-2.32431	93.8437		http://nonlinear.com/redirect/outbound?p=hmdb&param=HMDB46925
TG(61:10)	15.66_986.8149m/z		986.815	15.655	634153	1.55	152559	160580	152717	113496	114334	110968	164759	225856	156433	7127.64	2690.08	4242.73	524430	558511	819518	41.6017	31.5769	103.078	16949.1	11953.7	11437.7	28578.5	26071.6	27051.6	187640	154682	207917	LMGL03016652	TG(61:10)	M+NH4	C64H104O6	43.5	0	-0.744403	86.8894	-0.1389
TG(61:14)	14.28_978.7524m/z		978.752	14.2815	630673	0.62	127735	128785	127222	95185.3	94424.1	88080.2	90329.3	157510	109352	11687.3	7704.76	7223.65	491667	598560	801791	73.4534	0	20.6415	1989.98	2701.21	872.289	9440.39	7188.04	8113.84	118120	96557.3	138261	LMGL03012328	TG(61:14)	M+NH4	C64H96O6	42.4	0	-1.0999	91.3593	-0.2082
TG(62:11)a	15.37_984.7990m/z		984.799	15.3721	681898	1.28	178709	192909	175599	135295	135372	132367	111124	144184	110373	1199.28	856.695	2401.75	533332	662875	849487	235.097	90.4203	77.3038	25355.7	17674.8	15792	46196	41968.9	43498.9	302795	247259	347314	HMDB51378	TG(62:11)a	M+NH4	C64H102O6	44.2	0	-1.376	86.5372	-0.1128
TG(62:11)b	15.67_998.8149m/z		998.815	15.6684	3.39694e+06	1.84	825798	884576	827079	637563	624786	614541	724751	1.00216e+06	748502	150055	87495.4	103808	2.99474e+06	3.0949e+06	4.10118e+06	2694.37	1688.95	1806.73	106973	71427.6	67153.5	179487	175706	172683	1.12797e+06	940917	1.27056e+06	HMDB45448	TG(62:11)b	M+NH4	C65H104O6	41.4	0	-0.825576	78.3281	-0.1524
TG(62:12)a	15.40_978.7651n	978.765	996.799	15.3991	6.30742e+06	1.44	1.35679e+06	1.42374e+06	1.41235e+06	1.00565e+06	1.02288e+06	1.03499e+06	416346	639730	606103	83380.6	59061.9	72293.6	5.09701e+06	6.0269e+06	7.79835e+06	4179.58	1643.35	1589.43	158209	113299	95114.2	309387	278476	289333	2.12116e+06	1.73506e+06	2.36759e+06	HMDB45449	TG(62:12)a	M+NH4, M+Na	C65H102O6	45.2	0	-0.980723	91.3795	-0.1126
TG(62:12)b	15.51_1010.8148m/z		1010.81	15.5068	404010	0.39	83388.1	83596.5	78897	58797.8	58527.4	58341	10776	12818.3	15829.1	0	0	0	326781	364975	520272	2.32504	0.473676	2.87333	8919.22	6802.01	6236.89	15102.5	13632.4	13272.7	124874	105012	131850	HMDB52733	TG(62:12)b	M+NH4	C66H104O6	35.4	0	-2.33676	79.8422		http://nonlinear.com/redirect/outbound?p=hmdb&param=HMDB52733
TG(62:13)	15.08_976.7495n	976.75	994.783	15.0761	9.80892e+06	1.16	1.90342e+06	2.05652e+06	1.89434e+06	1.36644e+06	1.38672e+06	1.35528e+06	478851	836032	725127	35469.9	23470.6	30526.9	7.80406e+06	9.66267e+06	1.196e+07	4999.92	1323.91	1173.25	145441	126645	77834.6	145980	131224	126089	1.41169e+06	1.16808e+06	1.62036e+06	HMDB49679	TG(62:13)	M+NH4, M+Na	C65H100O6	38.2	0	-2.54683	94.0129		http://nonlinear.com/redirect/outbound?p=hmdb&param=HMDB49679
TG(62:14)	14.69_992.7677m/z		992.768	14.6858	4.24182e+06	1.65	890610	949253	910677	676415	654689	668559	895462	1.58236e+06	1.3297e+06	69279.8	41243.2	46447.4	3.50597e+06	3.74743e+06	5.47205e+06	2755.2	780.545	1145.71	45228.9	42247.7	24358.8	72242	59343.8	60536.3	576383	484888	686850	HMDB51387	TG(62:14)	M+NH4	C65H98O6	43.3	0	-1.00923	91.1017	-0.1674
TG(62:15)	14.32_972.7184n	972.718	990.752	14.322	6.07237e+06	0.66	1.13125e+06	1.20684e+06	1.16327e+06	857955	848085	857903	869360	1.40974e+06	1.03605e+06	113690	72472.1	63423.8	4.85658e+06	5.67914e+06	7.68139e+06	3489.17	1153.56	1343.06	33339.2	36805	16097.7	147676	120882	136641	734302	596705	839851	LMGL03016673	TG(62:15)	M+NH4, M+Na	C65H96O6	43	0	-0.99548	94.8807	-0.2216
TG(62:16)	14.00_970.7029n	970.703	988.737	13.9979	2.30893e+06	1.5	742558	797329	754400	542063	540270	527356	350780	548570	360128	61024	46645.1	31889.1	1.78822e+06	2.18991e+06	2.94866e+06	2313.67	576.341	724.971	21736.2	19368.2	13110.6	397295	327546	398606	1.79976e+06	1.53172e+06	2.24596e+06	LMGL03012437	TG(62:16)	M+NH4, M+Na	C65H94O6	43.6	0	-1.12387	94.9966	-0.1817
TG(62:7)	16.66_992.8623m/z		992.862	16.6578	375724	1.58	52561.7	58757.7	52514	39390.5	38687	38174	9474.65	6574.66	3825.8	7342.31	5869.06	5729.98	333423	312560	481188	19.4507	27.7999	10.4553	3182.04	1996.69	1988.5	3464.67	3249.1	3405.8	14807.7	14378.4	19548.3	HMDB46062	TG(62:7)	M+NH4	C64H110O6	35.9	0	-1.77946	81.8383		http://nonlinear.com/redirect/outbound?p=hmdb&param=HMDB46062
TG(62:8)a	16.34_990.8464m/z		990.846	16.3436	577904	0.99	103013	110043	101900	76272.7	74819.2	75236	31018	24950.5	16420.5	10765.7	7867.23	8203.33	483496	499022	751193	213.946	127.981	107.299	10020.1	6988.72	7538.49	11239.3	10882.8	12311.7	87382.6	79035.4	109716	HMDB46218	TG(62:8)a	M+NH4	C64H108O6	44.9	0	-0.498425	83.7032	-0.0958
TG(62:8)b	16.51_1004.8622m/z		1004.86	16.5074	1.25521e+06	0.39	252984	280205	261344	191827	193070	191732	131836	151523	92458.2	54239.9	38307.9	48388.3	1.10926e+06	1.18032e+06	1.47605e+06	1126.68	1248.3	991.61	27315.9	17155.9	19231.5	37062.8	35648.4	42939.5	319703	295533	411665	HMDB46044	TG(62:8)b	M+NH4	C65H110O6	42	0	-0.687649	74.6899	-0.1209
TG(62:9)	16.22_1002.8449m/z		1002.84	16.2217	3.59459e+06	3.1	737053	781786	747398	547291	543530	512831	321834	449451	361173	84517.5	57889.1	74417.9	3.19684e+06	3.24991e+06	4.33702e+06	1899.76	1229.27	1227.11	59663.5	45648.8	44455.1	88231.8	82539.8	91818.4	1.08312e+06	936046	1.21695e+06	HMDB51792	TG(62:9)	M+NH4	C65H108O6	36.6	0	-3.56346	87.1119		http://nonlinear.com/redirect/outbound?p=hmdb&param=HMDB51792
TG(64:10)	16.29_1028.8608m/z		1028.86	16.2894	524401	2.63	138416	153705	146095	105444	103598	100117	68940.4	103042	74117.9	4882.58	2251.35	1312.57	482825	485119	605259	93.774	168.753	198.938	10442.5	7588.78	8529.86	26431.1	25522.7	28498.1	331768	287030	376736	HMDB46928	TG(64:10)	M+NH4	C67H110O6	43.4	0	-0.809279	85.1986	-0.1366
TG(64:12)	15.84_1024.8303m/z		1024.83	15.8435	1.48262e+06	2.55	304020	329181	307246	231247	221861	220849	87119.2	108291	82036.3	6248.5	3352.47	6259.06	1.30164e+06	1.30453e+06	1.84169e+06	407.597	492.984	294.831	36776.5	24528.1	24269.3	53320	51403.1	48296.1	452313	386655	566130	LMGL03012508	TG(64:12)	M+NH4	C67H106O6	55.3	0	-0.908136	83.8413	-0.0042
TG(64:13)	15.53_1022.8149m/z		1022.81	15.5337	2.76213e+06	1.15	600719	623005	587377	428517	418879	422593	52801	72179.9	73071.8	3272.5	3668.16	3161.47	2.30908e+06	2.52272e+06	3.4546e+06	1273.57	624.727	429.766	32630.1	30725	26596.2	102223	96609.3	94979.2	1.00851e+06	822752	1.11399e+06	HMDB51370	TG(64:13)	M+NH4	C67H104O6	38.4	0	-2.24805	94.5607		http://nonlinear.com/redirect/outbound?p=hmdb&param=HMDB51370
TG(64:9)	16.56_1030.8779m/z		1030.88	16.562	429330	1.83	96674	105502	98165.1	71463.8	73578.7	71156.9	42368.2	52145.4	31963.2	9797.66	6326.84	7466.24	370761	415919	501312	201.234	109.59	180.946	7619.98	5418.69	7091.01	15777	15876.8	18396.6	189636	166464	220415	HMDB52941	TG(64:9)	M+NH4	C67H112O6	42.8	0	-2.25313	80.592	-0.1203
TG(66:18)	14.44_1040.7677m/z		1040.77	14.4434	477181	5.54	80839.1	88040	79508.9	59673.9	54140.1	60112	0	0	0	0	0	0	398149	432362	601031	123.216	273.796	74.7187	3482.19	3623.56	2090.91	18220.2	13627.4	12090.2	57313	46462	47784.2	LMGL03012611	TG(66:18)	M+NH4	C69H98O6	43	0	-0.904877	91.0522	-0.181
TG(O-50:2) TG(P-50:1)	16.33_834.7897m/z		834.79	16.33	89696.5	2.06	33337.1	33940.2	32574.6	24412.6	22311.7	22655.2	18421.5	28335.1	17814.8	108401	74162	62950.1	11725.9	13324.9	16503.6	1186.57	689.32	472.017	5026.85	714.223	1527.06	4150.12	4427.17	6632.21	80993.2	80613.3	107483	HMDB47953	TG(O-50:2) TG(P-50:1)	M+NH4	C53H100O5	36.6	0	-1.41154	84.7502		http://nonlinear.com/redirect/outbound?p=hmdb&param=HMDB47953
TG(O-51:2) TG(P-51:1)	16.74_862.8214m/z		862.821	16.7404	193623	2.97	70211	73621.9	69404	53366.8	50740.3	50681.2	48530.4	59025.8	35141.9	253169	172516	155185	60860	77503.7	88514.4	2362.01	1677.35	1304.36	11927.7	2586.78	3628.35	11616	12513.5	15887.5	142570	148422	203445	HMDB43423	TG(O-51:2) TG(P-51:1)	M+NH4	C55H104O5	38.7	0	-0.99453	94.7528		http://nonlinear.com/redirect/outbound?p=hmdb&param=HMDB43423
TG(O-52:1) TG(P-52:0)	17.07_864.8371m/z		864.837	17.0704	62863.6	3.26	25916	27085.3	25425.3	20552.2	19354.3	19381.8	31414.8	41879.9	25476.2	61641.2	40110.4	38535.5	32344.9	47980.5	48746.5	1068.71	812.096	563.599	3298.62	1070.6	1263.05	7300.44	8277.58	8760.85	55686.9	58833.5	74070.5	HMDB42942	TG(O-52:1) TG(P-52:0)	M+NH4	C55H106O5	43.6	0	-0.974801	85.5412	-0.14
TG(O-52:3) TG(P-52:2)	16.47_860.8057m/z		860.806	16.4663	146296	2.5	52120.2	54738.9	53024.4	39336.7	37404.3	37278.2	40662	55750.3	33394.5	114810	85246.4	71728.8	42767.6	50199.2	64297.7	845.21	782.297	708.083	7420.85	1889.85	2920.36	7626.54	8717.26	10966.3	129508	128279	181102	HMDB42450	TG(O-52:3) TG(P-52:2)	M+NH4	C55H102O5	38.4	0	-1.03484	93.3493		http://nonlinear.com/redirect/outbound?p=hmdb&param=HMDB42450
TG(O-52:4) TG(P-52:3)	16.29_858.7895m/z		858.79	16.2894	134993	0.89	56818.5	61319.9	57471.4	42188.7	42585	41837	93367.7	150515	100856	96449.4	67034	59775.5	49293.4	61409.6	75157.1	1209.71	1212.13	926.087	6655.24	2187.5	3075.24	6612.61	7503.8	9627.55	125210	117570	162200	HMDB42660	TG(O-52:4) TG(P-52:3)	M+NH4	C55H100O5	37.5	0	-1.65267	89.5075		http://nonlinear.com/redirect/outbound?p=hmdb&param=HMDB42660
TG(O-52:5) TG(P-52:4)	15.98_856.7736m/z		856.774	15.9785	489093	4.51	178135	188784	194806	138044	137992	126708	165923	257953	180187	451637	297825	268550	102257	114115	157270	2053.05	962.029	1368.29	20859.4	4453.83	8397.28	40546.1	43488	54355.8	472167	427763	567348	HMDB42870	TG(O-52:5) TG(P-52:4)	M+NH4	C55H98O5	38.2	0	-1.91161	93.1682		http://nonlinear.com/redirect/outbound?p=hmdb&param=HMDB42870
TG(O-54:1) TG(P-54:0)	17.40_892.8682m/z		892.868	17.4004	52528.1	2.37	23703	24250.6	23127.3	20220.7	18368.1	18836.7	41283.3	57594.1	32099.7	61721.9	39001.9	40540.3	19135.4	25239.4	28996.3	450.646	293.797	382.726	2151.01	765.126	1121.82	9393.25	11519	10448.6	46802.6	49771.7	61010.1	HMDB42480	TG(O-54:1) TG(P-54:0)	M+NH4	C57H110O5	36.8	0	-1.03159	85.1789		http://nonlinear.com/redirect/outbound?p=hmdb&param=HMDB42480
TG(O-54:2) TG(P-54:1)	17.10_872.8180n	872.818	890.852	17.0979	359388	0.99	148830	157198	153726	119524	117353	119237	225055	293975	167956	470972	300083	307108	170723	214576	252568	3079.16	2540.04	1983.78	20414.9	5957.54	7539.69	40693.4	46753.2	50281.6	293032	304951	400082	HMDB42690	TG(O-54:2) TG(P-54:1)	M+NH4, M+Na	C57H108O5	37.5	0	-1.94713	89.9473		http://nonlinear.com/redirect/outbound?p=hmdb&param=HMDB42690
TG(O-54:3) TG(P-54:2)a	16.26_896.8045m/z		896.804	16.2623	157764	1.58	69499.7	74251.5	70964.6	54203	53458.2	52519.7	88361.6	89457.2	64180.1	137972	101376	81418	82821.4	83626.4	121545	291.157	272.506	615.506	14920.3	5222.08	6298.67	20838.8	23082.2	26655.9	152285	136177	184831	HMDB43800	TG(O-54:3) TG(P-54:2)a	M+NH4	C58H102O5	41.3	0	-0.763718	83.9873	-0.2176
TG(O-54:3) TG(P-54:2)b	16.78_888.8359m/z		888.836	16.7816	260492	3.34	104262	110618	104661	82431.6	78502.5	76641.8	119074	163153	96880.9	288822	198519	185422	104644	123346	153194	2287.57	1947.65	1741.61	16821.8	6027.95	7155.58	20698.4	23753.4	26788.8	226090	236603	318784	HMDB44192	TG(O-54:3) TG(P-54:2)b	M+NH4	C57H106O5	35.8	0	-2.2922	81.8577		http://nonlinear.com/redirect/outbound?p=hmdb&param=HMDB44192
TG(O-54:4) TG(P-54:3)a	16.52_886.8214m/z		886.821	16.5211	134824	2.17	54470.9	56736.4	54632.6	42207.6	41633.1	40446.9	89195.7	126006	77259.4	63841.2	48770.2	41967.4	61068.5	75652.2	91896.2	293.407	110.498	399.641	4551.98	1674.4	2675.35	7017.93	7564.4	9240.2	118674	118455	167341	HMDB42720	TG(O-54:4) TG(P-54:3)a	M+NH4	C57H104O5	36.9	0	-0.870543	85.5045		http://nonlinear.com/redirect/outbound?p=hmdb&param=HMDB42720
TG(O-54:4) TG(P-54:3)b	16.70_886.8213m/z		886.821	16.6991	151264	3.94	32496.7	36411.5	33381.7	31512.4	29541	29374.6	124168	206878	122744	97935.9	65037.7	62129.1	17581.4	21399.9	22059.7	303.641	325.124	492.066	5466.45	1545.8	1735.32	5031.92	6221.12	6949.62	29245.2	28810.9	39593.7	HMDB42720	TG(O-54:4) TG(P-54:3)b	M+NH4	C57H104O5	36.9	0	-1.00198	85.4959		http://nonlinear.com/redirect/outbound?p=hmdb&param=HMDB42720
TG(O-54:5) TG(P-54:4)	16.40_866.7716n	866.772	884.805	16.398	703644	1.83	283755	309343	301820	227402	235077	234361	574152	932449	604331	832787	536021	489235	199987	250202	315721	1796.73	1647.54	2334.69	37271.4	7476.04	9844.4	54283.1	57423	73934.6	515028	473197	629129	HMDB42750	TG(O-54:5) TG(P-54:4)	M+NH4, M+Na	C57H102O5	38.5	0	-1.25261	93.8013		http://nonlinear.com/redirect/outbound?p=hmdb&param=HMDB42750
TG(O-54:6) TG(P-54:5)	16.03_864.7553n	864.755	882.789	16.0326	1.50355e+06	1.01	697598	746618	733881	534121	544752	541638	966437	1.17307e+06	773772	1.7916e+06	1.2463e+06	1.11338e+06	776041	997552	1.28404e+06	6521.2	6513.87	6124.05	101394	27035.1	32128.5	173667	184154	219214	1.44617e+06	1.31651e+06	1.74798e+06	HMDB42930	TG(O-54:6) TG(P-54:5)	M+NH4, M+Na	C57H100O5	35.8	0	-2.00291	81.3507		http://nonlinear.com/redirect/outbound?p=hmdb&param=HMDB42930
TG(O-56:2) TG(P-56:1)	17.41_918.8839m/z		918.884	17.4141	148426	2.72	68529.3	71259.1	67654	57815.2	53440.1	53340.6	120967	142291	83661.5	188470	123497	133312	88696.9	110177	133297	1432.36	1331.61	960.722	8615.86	3426.53	3891.46	21149	26200.7	25309.2	112446	120061	146864	HMDB44416	TG(O-56:2) TG(P-56:1)	M+NH4	C59H112O5	38.7	0	-1.01617	94.7534		http://nonlinear.com/redirect/outbound?p=hmdb&param=HMDB44416
TG(O-56:3) TG(P-56:2)	17.13_916.8674m/z		916.867	17.1254	296521	3.36	138850	147825	140451	119286	113030	109766	268647	325547	186933	378988	248633	260238	170993	190731	252536	2181.86	1997.2	2210.38	21560.1	9365.31	11516.3	41807.4	48392	51736.1	254189	276193	359182	HMDB45018	TG(O-56:3) TG(P-56:2)	M+NH4	C59H110O5	37.8	0	-1.91568	91.0532		http://nonlinear.com/redirect/outbound?p=hmdb&param=HMDB45018
TG(O-56:4) TG(P-56:3)	16.85_914.8508m/z		914.851	16.8504	254400	3.21	111321	116485	109546	91367.9	86332.5	84404.3	198867	277491	167092	196529	130455	132833	151666	183087	235797	1270.95	1292.08	1351.61	14911.1	7388.76	8879.17	22681.6	25702.3	29013.4	219633	230278	313287	HMDB44444	TG(O-56:4) TG(P-56:3)	M+NH4	C59H108O5	35.2	0	-3.00835	79.3564		http://nonlinear.com/redirect/outbound?p=hmdb&param=HMDB44444
TG(O-56:6) TG(P-56:5)	16.45_892.7870n	892.787	910.821	16.4526	1.71812e+06	0.54	750073	808351	787426	584369	582214	578198	1.02198e+06	1.43009e+06	891442	1.55763e+06	1.03929e+06	986030	919533	1.15032e+06	1.48191e+06	4957.2	4645.45	5257.56	95567.8	32351.3	39336.4	157883	175643	202471	1.58125e+06	1.50568e+06	2.06745e+06	HMDB44640	TG(O-56:6) TG(P-56:5)	M+NH4, M+Na	C59H104O5	35.7	0	-1.55137	80.3954		http://nonlinear.com/redirect/outbound?p=hmdb&param=HMDB44640
TG(O-56:7) TG(P-56:6)	16.18_890.7701n	890.77	908.804	16.1812	1.52718e+06	3.7	638832	687327	687305	470204	498157	504337	783975	910300	615751	827239	666862	604283	959615	1.13664e+06	1.54733e+06	6725.76	6740.5	5674.66	103702	43226.5	51077	188411	202947	225363	1.47552e+06	1.32631e+06	1.7797e+06	HMDB49050	TG(O-56:7) TG(P-56:6)	M+NH4, M+Na	C59H102O5	33.4	0	-2.90909	70.3859		http://nonlinear.com/redirect/outbound?p=hmdb&param=HMDB49050
TG(O-56:8) TG(P-56:7)	15.83_906.7887m/z		906.789	15.83	597496	4.42	212580	222312	232230	151878	159969	165995	194627	293630	212689	125311	92455.7	89500.6	300297	326062	499507	1481.61	1286.98	916.259	28345.5	13262.9	17703.9	46471.9	48410.7	53171.9	575521	506593	710375	HMDB53222	TG(O-56:8) TG(P-56:7)	M+NH4	C59H100O5	36.3	0	-2.42212	84.1842		http://nonlinear.com/redirect/outbound?p=hmdb&param=HMDB53222
TG(O-58:10) TG(P-58:9)	15.71_912.7542n	912.754	930.788	15.7088	1.55761e+06	0.96	644944	698794	708455	488150	497120	490187	627089	1.08804e+06	820779	966359	630128	580384	724939	934952	1.25547e+06	1974.97	951.938	1393.67	62918.5	18860.3	26709.2	229005	234126	253571	1.52455e+06	1.31492e+06	1.83335e+06	HMDB55530	TG(O-58:10) TG(P-58:9)	M+NH4, M+Na	C61H100O5	35.7	0	-3.17344	82.0793		http://nonlinear.com/redirect/outbound?p=hmdb&param=HMDB55530
TG(O-58:3) TG(P-58:2)	17.44_944.8994m/z		944.899	17.4417	130260	2.67	55188.2	57138	54230.4	45851.6	43439.4	42104	76079.5	80358.8	49772.8	141342	95656.3	110125	108363	123824	158594	698.996	749.673	697.997	9757.78	4554.26	5521.84	15347.9	18504.9	18385.9	84522.3	86739.1	110630	HMDB45814	TG(O-58:3) TG(P-58:2)	M+NH4	C61H114O5	38.3	0	-1.17655	92.7387		http://nonlinear.com/redirect/outbound?p=hmdb&param=HMDB45814
TG(O-58:4) TG(P-58:3)	17.18_942.8824m/z		942.882	17.1804	147034	3.4	63787.2	68397.2	64462.2	52598.4	51038.5	49141.5	105263	111426	66078.9	113984	77335.5	84821.9	128519	130666	181917	619.751	664.516	839.191	11523.2	6656.71	8089.76	17147.8	20234	20588.5	122748	134881	177581	HMDB45261	TG(O-58:4) TG(P-58:3)	M+NH4	C61H112O5	35.3	0	-2.55212	79.458		http://nonlinear.com/redirect/outbound?p=hmdb&param=HMDB45261
TG(O-58:7) TG(P-58:6)	16.59_918.8022n	918.802	936.836	16.5894	1.5029e+06	0.55	592903	646374	616107	453495	456770	451840	641124	843077	512532	780017	541904	521534	1.2033e+06	1.43879e+06	1.86661e+06	2828.45	2504.84	3299.01	64304.1	32153	38940.2	129252	138659	157956	1.19642e+06	1.15247e+06	1.59411e+06	HMDB49680	TG(O-58:7) TG(P-58:6)	M+NH4, M+Na	C61H106O5	35.2	0	-1.94488	78.5036		http://nonlinear.com/redirect/outbound?p=hmdb&param=HMDB49680
TG(O-58:8) TG(P-58:7)	16.33_934.8200m/z		934.82	16.33	686527	1.69	292170	318977	307941	231641	232175	225215	465272	786554	557398	185937	135518	127901	561828	612980	884772	1104.75	1038.06	1548.02	31547.5	16127.8	20160.8	53254.4	58208	63215.2	561310	526333	739862	HMDB51354	TG(O-58:8) TG(P-58:7)	M+NH4	C61H104O5	36.9	0	-2.35917	87.3674		http://nonlinear.com/redirect/outbound?p=hmdb&param=HMDB51354
TG(O-58:9) TG(P-58:8)	16.02_932.8042m/z		932.804	16.0191	1.3659e+06	0.9	476714	521680	502575	378377	385252	381497	791740	1.34086e+06	949233	417029	301975	281241	1.04665e+06	1.26889e+06	1.78216e+06	1410.43	1015.1	1609.44	52303.1	24058.6	23428.2	64750.2	70634.2	76317.2	668632	591959	815413	HMDB53250	TG(O-58:9) TG(P-58:8)	M+NH4	C61H102O5	34.9	0	-2.61644	77.5729		http://nonlinear.com/redirect/outbound?p=hmdb&param=HMDB53250
TG(O-60:10) TG(P-60:9)	16.03_958.8196m/z		958.82	16.0326	359135	4.59	111950	122892	117483	99182.8	96623.8	90647.1	269211	475579	332616	169511	106332	110947	129817	123190	211204	153.18	104.129	256.289	8601.41	3307.16	4409.15	36426.9	42684.3	43552.8	190043	165595	221578	HMDB54330	TG(O-60:10) TG(P-60:9)	M+NH4	C63H104O5	37.4	0	-2.75653	90.2988		http://nonlinear.com/redirect/outbound?p=hmdb&param=HMDB54330
TG(O-60:11) TG(P-60:10)	15.88_956.8033m/z		956.803	15.884	1.189e+06	1.91	382354	408190	403509	295844	290971	284784	445748	642596	438252	216609	156075	138408	415869	426690	618538	1250.5	549.056	863.163	35889.4	19131.9	25692.9	240732	250396	248389	1.14652e+06	1.0148e+06	1.40568e+06	HMDB55800	TG(O-60:11) TG(P-60:10)	M+NH4	C63H102O5	42.5	0	-0.0469917	82.4956	-0.1519
TG(O-60:6) TG(P-60:5)	17.11_966.8834m/z		966.883	17.1116	310816	3.55	56007.5	61368	57934.1	54854.8	52966.3	51094.7	311860	380293	240295	78455.6	50295.8	64404.5	86334.9	85265.4	124077	311.144	496.62	792.567	7731.18	4501.12	4930.79	12499.3	14130.6	15183.8	55083	52735.2	70355	HMDB46230	TG(O-60:6) TG(P-60:5)	M+NH4	C63H112O5	37.9	0	-1.46994	91.3745		http://nonlinear.com/redirect/outbound?p=hmdb&param=HMDB46230
TG(O-60:7) TG(P-60:6)	16.86_964.8666m/z		964.867	16.8641	506197	2.65	229710	251476	233454	194685	187700	184945	462223	625266	388547	299094	196671	222019	422590	449084	646917	845.64	1026.41	1541.3	21011.5	11330.5	14821.3	93695.8	106934	117145	445231	451897	618796	HMDB50850	TG(O-60:7) TG(P-60:6)	M+NH4	C63H110O5	36.5	0	-2.72117	85.7464		http://nonlinear.com/redirect/outbound?p=hmdb&param=HMDB50850
TG(O-60:8) TG(P-60:7)	16.62_962.8516m/z		962.852	16.6167	529690	1.42	214447	237223	224895	170663	169740	166134	344874	544667	371347	148566	100650	110922	466431	456432	666208	809.563	710.805	1050.12	19707.2	11670.9	15142.5	47909.2	52927.4	57056.9	424198	411295	577074	HMDB51282	TG(O-60:8) TG(P-60:7)	M+NH4	C63H108O5	43.6	0	0.666331	82.6615	-0.1195
TG(O-60:9) TG(P-60:8)	16.33_960.8352m/z		960.835	16.33	824445	0.78	174090	191754	184681	157606	155961	155225	607910	1.09064e+06	774782	128831	81220.6	87400.1	250637	211597	354585	266.019	294.214	929.687	15009	8354.6	9818.26	28478.7	30982.2	32905.6	218349	192051	264853	HMDB51390	TG(O-60:9) TG(P-60:8)	M+NH4	C63H106O5	36.6	0	-2.81911	86.5649		http://nonlinear.com/redirect/outbound?p=hmdb&param=HMDB51390
TG(O-62:11) TG(P-62:10)	16.34_984.8342m/z		984.834	16.3436	286997	4.15	45263.7	50705.1	49640.2	34929.2	37332.6	37933.4	29127	35731.3	23203.1	8878.59	4441.42	7375.2	236745	243671	380575	10.7583	0	13.4729	6503.77	4561.93	3939.95	6288.58	6223.14	6712.88	27561.2	21498.4	29574	HMDB55140	TG(O-62:11) TG(P-62:10)	M+NH4	C65H106O5	35.6	0	-3.7857	82.2582		http://nonlinear.com/redirect/outbound?p=hmdb&param=HMDB55140
TG(O-62:8) TG(P-62:7)	16.99_990.8824m/z		990.882	16.9879	316699	3.54	91309.2	100096	93920.5	78171.6	73745.1	73408.6	196195	208151	130570	53272.6	34343.6	40913.5	283034	268415	398647	120.122	234.926	415.065	11049.9	7708.07	9833.18	40517.6	48795.8	49887.4	172260	164946	222462	HMDB54630	TG(O-62:8) TG(P-62:7)	M+NH4	C65H112O5	43.3	0	-1.86526	85.8039	-0.1409
Unk.1	4.80_498.3450m/z		498.345	4.80087	104279	2.79	39003	47313.4	45053.5	36892.4	38785.7	37059.6	53016.5	50074.5	42532.9	35315.5	40947.7	32988.5	58848.4	62630.1	52285.6	5059	5809.94	11293.9	26158.4	10418.3	9532.61	27139.5	31881	37592.2	92429.9	105808	114600		Unk.1
Unk.2	9.21_816.6332m/z		816.633	9.21278	91761.2	0.63	33525.5	36186.4	34930.4	46675.7	47164.6	47204.1	18111.3	15537.6	15977.6	21046.4	22201.2	20612.3	8354.34	9920.89	9885.15	82275.4	79534.1	113474	66498.3	43610.6	47370	85937.8	89069.2	92257.2	33551.2	33886.7	38309.4		Unk.2
Unk.3	9.25_563.4909n	563.491	546.488	9.25403	81708.5	1.45	27446	33337.8	31188.5	32417.1	32764.6	31332.2	17016.4	9507.55	9732.76	10218.6	10081	9559.94	83033.9	81332.4	80759.1	13990.7	15102.2	22524.2	35072.9	24853.2	20690.3	43048.3	46727.7	54052.8	45084.5	54776.4	66952		Unk.3	M+H-H2O, M+H
Unk.4	9.62_580.4929m/z		580.493	9.62178	123246	5.7	22391.5	21999.7	20101.1	19019.4	15849	15374.8	30789.9	25907.4	18831	1370.88	1269.9	991.405	109043	123898	136796	29.8329	17.4106	50.2892	59.0014	351.715	21.3354	6460.87	6503.14	8077.27	12051.6	16083.9	13251		Unk.4
Unk.5	9.65_547.4958n	547.496	530.493	9.64907	276385	1.29	100815	115627	111445	104022	103470	106024	48170.2	26978.4	29598.4	25610.2	23579.1	23016.7	316586	241954	270616	51495.2	59460.2	85465.1	144746	97690.3	90103.6	141919	140465	163649	138428	148362	200341		Unk.5	M+H-H2O, M+H, M+Na
Unk.6	9.77_653.5499m/z		653.55	9.77252	107076	1.33	42541.9	48090.5	49358.8	64526.9	66128.6	64758.8	96602.2	100374	124252	104849	99885.3	94897.1	119055	83453.7	78144.9	26491	27084.6	37963.1	64173.5	49620.2	49798.1	81295.7	89953.3	104827	67909.2	89842.8	75691.9		Unk.6
Unk.7	10.10_582.5086m/z		582.509	10.1003	63679.8	5.58	22401.6	23252.5	20818.2	23157.6	20098.3	19233.4	67291.3	71644.5	52103.6	59261.7	47866.2	41014	46069.7	45755.2	53144.8	165.159	243.602	279.586	4050.33	849.682	861.241	13094.1	13336.7	21514.2	15594	21977.7	19783		Unk.7
Unk.8	10.43_684.2016m/z		684.202	10.4286	114142	1.56	101655	88356.5	88362.5	73225.7	74268.8	75957.7	39034.9	87543.9	147721	75390.3	73090.6	74477.8	110977	104307	127144	84041.7	75553.8	65808.5	61557.3	66997.4	93288.6	80899	96747.6	81836.6	117610	70173.1	60919.7		Unk.8
Unk.9	10.43_722.5261m/z		722.526	10.4286	87238	2.88	96370.8	71734.4	81818	57120	63974.3	66091.3	3138.64	60270.9	160369	61358.9	64975.8	63577.2	2385.36	78088.6	83271.3	85710.5	102682	62814.8	48725.6	84940.8	69616.9	83243.8	126927	51543.2	111470	66489.4	52639.9		Unk.9
Unk.10	10.43_736.5417m/z		736.542	10.4286	306209	4.14	330078	250667	276848	221078	238703	236491	96756	287114	513330	251807	244233	225489	28038.3	290108	318021	266901	285528	212417	176982	252854	228283	300387	410060	208179	389551	253074	235672		Unk.10
Unk.11	10.46_682.5394m/z		682.539	10.4556	279334	6.43	52513.3	66286.9	55841.2	51885.9	47807.2	45762.1	269040	159730	113686	26450.4	20881.4	19604.2	320584	213144	304275	93.3351	146.022	302.934	6953.67	2577.41	1882.86	7551.35	5040.66	9289.66	29717.2	40780.7	54619.1		Unk.11
Unk.12	10.48_747.6157n	747.616	786.599	10.4827	2.21855e+06	1.49	723743	742552	722171	757513	761418	740377	626926	744048	648555	885531	849910	821946	2.42171e+06	1.83338e+06	2.40055e+06	369050	342609	479044	1.09377e+06	667692	753321	413842	472051	522407	843044	857696	992288		Unk.12	M+Na, M+K
Unk.13	10.50_608.5243m/z		608.524	10.4963	168003	7.26	36985.1	42060.7	37397.7	30163.1	27639.1	25857.5	37385.8	27566.9	16656.7	22076.6	16686.8	16697.5	162669	151076	190264	1551.67	2154.37	2385.07	4550.78	2716.58	2053.7	11843.5	10836.2	14695.3	51427.7	67228.9	69321.5		Unk.13
Unk.14	10.59_658.5400m/z		658.54	10.5923	161318	6.58	62442.2	75045.3	63750.3	57999.4	54436.4	50840.5	129097	90405.7	60253.3	127072	95847.4	91880.9	182162	139640	162153	1187.64	1199.14	2500.49	29938.5	10228.8	11841.6	27513.9	24000	36765.3	67041.1	97024.1	120758		Unk.14
Unk.15	10.65_634.5381m/z		634.538	10.6473	197129	7.35	32448.6	37086.1	33088.5	31940.5	29139.1	27491.6	64206.5	30061.4	21668.2	29398.6	21976.2	21807.1	188129	186582	216677	1394.08	1575.65	2657.34	9727.51	5238.45	4783.2	12899.8	11890.1	16699	27105.7	39116.8	44354.6		Unk.15
Unk.16	10.78_892.5338m/z		892.534	10.7848	666893	3.36	120049	151783	134858	168060	160632	157445	151908	1.1095e+06	739271	163634	157750	82048.3	205949	28123.4	125405	142956	214294	378601	106345	65750.7	57544.9	4587.32	2253.32	3364.24	30717.1	44136.7	73783.5		Unk.16
Unk.17	10.81_584.5246m/z		584.525	10.8123	88331.7	6.73	34364.1	36627.7	32008.9	37077.7	32434.6	30646.7	81684.8	75922.9	52548	85059.3	70455	69743.1	80522.4	92113.3	92359.4	704.477	1033.32	1528.46	7044.28	2087.7	2277.55	21428.6	23031.1	35918.4	26710.6	38218.6	34574.6		Unk.17
Unk.18	10.83_797.6315n	797.632	820.621	10.826	1.15597e+06	2.18	375523	418966	377057	433272	440575	421888	470867	481893	394165	170298	178391	144363	1.20867e+06	1.04093e+06	1.2183e+06	324316	321428	463888	668909	414648	428605	411534	460049	563878	454290	442073	509089		Unk.18	M+Na, M+K
Unk.19	10.87_658.5402m/z		658.54	10.8673	287354	10.23	64147.9	74419.2	61458.4	54807.1	49056.4	44702.3	39019.4	27932.4	19112.9	16342.8	15967.7	12241.8	260231	280208	321621	1036.97	1071.11	2399.04	11865.8	5622.99	6949.51	32790.5	35555.4	46636.2	84881.9	116020	122696		Unk.19
Unk.20	10.89_549.4875m/z		549.487	10.8948	58192.1	6.28	27479.3	24934.5	24498.8	22477.1	21228.1	19301.8	40237.3	54069.7	43111.4	63795.2	54683.9	54757.5	44047.7	63949.1	66579.7	771.57	1215.84	1510.36	5072.27	1991.9	2182.96	17016.5	17655.7	25736.3	20954.9	25619.2	21443.2		Unk.20
Unk.21	10.95_802.5724m/z		802.572	10.9498	68322.5	1.53	25965.6	31875	28014.8	27244.2	28062	27475.1	16368	16090.1	15344.1	10073.6	10312.6	9161.12	79652.9	49394.7	75920.1	13329.1	13737.2	15267	33506.9	21277.6	21713.2	39706.4	39855.7	46939.3	46447.9	44958.4	53177.5		Unk.21
Unk.22	11.00_634.5401m/z		634.54	11.0048	177197	8.68	27574.1	33823.4	28718.1	34360	30351.8	27600.8	216384	175226	139980	106382	85474.2	86721.4	22731.7	22033.1	25869.3	927.228	1173.38	2110.92	6412.61	2134.14	2701.26	6475.41	6477.47	9294.17	12225.3	14283.4	18286.1		Unk.22
Unk.23	11.00_684.5552m/z		684.555	11.0048	439163	6.74	78380.5	99549.5	84290.9	79191.2	72410.5	66748.2	87356.9	55313.2	40805.9	37577.3	29815.4	29449	453394	405139	458956	894.595	799.3	1943.77	23974.2	12003.4	13549.1	16659.6	17349.1	23144.6	50926.4	70350	89738.2		Unk.23
Unk.24	11.05_610.5402m/z		610.54	11.0461	95813.3	8.37	35271	40382.5	34837.4	35809	31878.1	29219.5	61011.7	54274.6	41932.1	113907	86197.4	87336	91363.9	78750.6	93111.7	1397.24	1892.34	2768.35	12549.7	4067.49	5093.05	9393.65	9575.73	14854.2	32084.9	45965.5	44683.2		Unk.24
Unk.25	11.13_660.5552m/z		660.555	11.1286	183550	7.31	42752.6	51755.8	43454.7	44436	40908.7	38438.4	101497	70263	53204.7	45335.8	36351.5	33918.7	198379	160900	191372	1368.26	1241.52	2813.97	17671	7380.72	9279.95	9892.83	9877.64	14544.7	32498.1	45533.7	57492.3		Unk.25
Unk.26	11.24_565.5664m/z		565.566	11.2386	147456	2.39	122659	111756	115627	84454.1	82958	86973.5	78906.3	103811	138162	109112	95477.3	94528.3	94879.3	146589	192638	86653	79704.2	63727.5	76231.1	92571.9	79910.9	121696	128608	94218.7	176526	117930	147912		Unk.26
Unk.27	11.44_686.5715m/z		686.571	11.4448	155727	6.77	44155.3	53393.6	45390.7	43714.7	40481.9	37175.7	55388	37063.3	30720.1	33614.1	29029.2	28353.8	162101	143559	161522	3151.7	2786.58	5681.44	20489.4	8822.62	12390.9	24934.2	26653.1	36740.5	58732.8	78354	118839		Unk.27
Unk.28	11.54_530.4698n	530.47	548.503	11.5411	207512	3.31	195889	114775	134317	153146	144775	144610	85764	129911	340230	97657.1	98430.2	104497	62294.5	147662	142105	173759	214798	157674	173344	133402	227834	153998	249527	219010	151229	112349	83807.1		Unk.28	M+H, M+NH4
Unk.29	11.65_612.5551m/z		612.555	11.6511	70611.5	5.92	24232.4	27974	23583.8	25558.1	23151.3	21611.1	36107.5	27475.4	19818	78784.4	61590.4	71459.7	56303	53923.2	60580.4	1635.13	2324.71	3277.36	9355.27	3502.79	4013.16	9883.58	11535.1	15896.3	22303.9	27904.9	29698.6		Unk.29
Unk.30	11.66_887.5674m/z		887.567	11.6648	104653	1.59	30258.3	34300	32478.7	36124.3	37228.2	36359.3	95746.8	112508	105703	42067	60433.3	51920	108389	30499.2	97067.3	39834.2	27267.4	62142.1	26095.8	12035.9	11728.5	2058.43	1895.92	2928.52	11032.5	7478.87	8686.14		Unk.30
Unk.31	11.87_871.5723m/z		871.572	11.8711	2.96482e+06	1.38	808221	869548	863844	885435	899555	875123	1.60396e+06	3.93701e+06	3.3535e+06	1.03819e+06	1.35908e+06	1.22785e+06	2.07444e+06	476207	2.08566e+06	975036	651152	1.43398e+06	348930	159391	157182	25114.5	21386.9	29317.4	274118	404904	499354		Unk.31
Unk.32	12.05_593.5978m/z		593.598	12.0499	92758.9	1.74	77411.5	71386.5	73608	53633.1	54173.6	55479.1	51724.6	69404.4	88745.9	69949.7	63176.2	61999.7	55639.2	88041.8	117537	55000.7	51652.3	42121.5	49106.4	57858.7	50281.5	78433.6	83411.2	62225.6	109397	76459.8	92419.4		Unk.32
Unk.33	12.13_871.5725m/z		871.572	12.1324	490883	2.76	127455	134694	130904	157373	154661	148443	275910	657147	539592	171659	234740	201170	361758	79313.5	355247	176242	147389	287945	60616.5	32093.1	31938.6	4421.65	3362.61	4636.47	42565.7	58935.9	71846.2		Unk.33
Unk.34	12.60_884.7338m/z		884.734	12.5999	165159	1.59	40378.3	42139.5	40672	35102.2	34680.2	34013.9	65660	129413	68641.7	247884	171512	76082	58340.5	60461.4	86242	715.916	766.513	1006.78	9252.26	396.817	627.419	9017.43	7796.02	14143	28192.5	26801.6	30586.3		Unk.34
Unk.35	12.81_934.7487m/z		934.749	12.8058	288063	1.3	109437	106942	112814	87024.4	87988.1	85730.4	192940	318327	218235	265980	209913	104595	253733	234151	376304	190.546	49.2158	325.652	11964.5	1650.36	2026.16	30964.4	27108.7	39459.4	122846	106070	140927		Unk.35
Unk.36	12.82_647.4582m/z		647.458	12.8194	249290	1.14	98883	95256	80711.2	109402	108669	106998	5538.21	35337.4	310456	45773	26449.8	142348	769.45	24625.4	4591.77	233104	382152	132613	144340	171179	174251	146863	302010	35911.5	94309.2	43767.4	33590.3		Unk.36
Unk.37	12.96_908.6752m/z		908.675	12.9569	510700	4.17	94677.4	102729	97345.5	71423.3	70740.5	65698.8	7959.5	14381.4	9442.61	2377.71	1093.86	525.719	22510.1	27675.7	37715.9	194.51	10.5007	12.0366	139.555	147.117	1169.21	144574	108143	135338	434121	435072	662906		Unk.37
Unk.38	13.18_886.7491m/z		886.749	13.177	176443	3.2	42581.3	45059.3	45002.6	37280.9	35668.7	33443.4	78094.1	124479	70747.4	260974	183010	85343.6	54869.9	64060.6	99935.3	2160.76	2275.19	2915.96	9720.91	1256.79	1769.65	11544	10103.7	14294.8	34396.4	29103.3	38026.7		Unk.38
Unk.39	13.27_912.7645m/z		912.764	13.2732	211555	1.09	53338.3	53777.4	60034.1	41302.9	42057.9	41251.6	57180.6	80956.8	48469.4	315826	216663	102175	91580.4	99162.8	149896	99.7426	23.0394	36.3929	11742.6	542.327	839.903	7228.99	6321.75	10456.8	62553.8	43269.5	60603.5		Unk.39
Unk.40	14.12_595.4710m/z		595.471	14.1196	175569	1.98	54104.7	56083.5	54316.3	41610.8	41135.9	39181.6	50431	96625.4	69466.9	40564	31299.5	19953.3	137365	167759	221582	57.0341	12.7715	14.3583	888.739	563.631	301.783	20185.3	15650.1	20373.2	90454.6	81484.2	118862		Unk.40
Unk.41	14.39_545.4554m/z		545.455	14.3894	133245	0.72	26544.6	28524.4	28002	20488.1	20704.8	20772.9	29822.1	44084.5	29866.9	2165	1145.53	1152.25	105161	129826	164748	26.8948	4.34479	0	312.818	536.999	155.63	4235.15	3132.4	4164.33	19861.4	18330.8	25011.7		Unk.41
Unk.42	14.47_547.4710m/z		547.471	14.4703	93721.8	2.69	35421	37439.4	36607.7	28177.7	29315.3	27860.8	67442.9	126641	87081.6	64820.4	47219	33690	34242.4	44868.1	61544.3	108.449	27.6739	69.3588	1839.01	437.146	374.738	18262.8	14197.2	18260.4	65950.1	55563.1	75165.5		Unk.42
Unk.43	14.48_595.4710m/z		595.471	14.4838	109424	4.5	39123	42588.9	42008.4	32407.8	34950.2	32169.5	66590.1	123354	89737.7	50209.8	37250.7	26427.3	84495.6	109849	133928	63.2504	0	23.887	1648.86	677.317	406.297	15585.4	12651.7	15748.3	50634.2	44290.7	58420.7		Unk.43
Unk.44	14.59_597.4866m/z		597.487	14.5915	304695	2.04	108242	112534	107742	78114.4	81314.9	80258.3	98298.1	174044	123221	110041	84096.7	58459.8	240375	300866	372843	97.0755	5.4816	29.0843	2489.53	1299.41	964.42	27944	23534.2	31614	192576	171589	238998		Unk.44
Unk.45	14.75_521.4555m/z		521.455	14.7531	109500	3.56	29031.9	31178	30439.2	24623.5	25875.5	26396.6	86910.5	147171	94418.4	48269.7	39903.3	29113.3	26427.3	34025.7	42805.3	520.7	426.662	387.499	2516.72	1085.47	823.036	19621.6	17327.2	21391.6	40630.3	30197.3	43293.8		Unk.45
Unk.46	14.75_797.6615m/z		797.662	14.7531	171405	6.62	77869.5	74480.1	87341.4	53172.9	62524.8	72881.7	117321	201079	195814	194597	140944	139167	66223	86064.3	130011	2967.55	2099.11	1940.34	12357.3	5103.81	4009.86	72704.9	66288.7	75521.8	94287.5	57592.9	71095.6		Unk.46
Unk.47	14.82_547.4711m/z		547.471	14.8204	217498	2.28	65366.1	69533.8	67152.6	55498.9	57309.6	58010.8	169857	286468	196169	208804	161375	113758	74525.2	86605.6	112316	646.845	448.524	474.909	8393.56	1910.53	1717.23	22737.7	18922.1	23253.6	61593.7	48908.4	67081.2		Unk.47
Unk.48	14.82_823.6772m/z		823.677	14.8204	412877	5.12	220812	221476	241327	147363	168713	194797	229692	338192	325846	518476	382675	337480	263435	360838	513973	4097.13	2276.94	1974.93	35398.3	10757.1	7464.76	92823.4	81113.5	90800.8	309251	199395	258726		Unk.48
Unk.49	14.93_549.4866m/z		549.487	14.928	138743	1.5	63779.5	65722.6	64864.8	47332.2	50225.7	49078.4	91963.2	162599	106716	178268	133309	104653	60337.4	79076.6	97337.2	384.023	318.434	300.892	5098.14	1359	1479.51	28493.8	25210.3	29594.8	108648	91488.1	126064		Unk.49
Unk.50	14.93_573.4866m/z		573.487	14.928	270989	3.28	81783	86896.5	82607.7	57904.8	61591.3	58445.6	51360.1	70391.4	50097.5	34647.3	26349.5	18692.7	207391	254979	350597	167.558	28.0923	30.1685	3696.93	2390.89	1859.16	9690.96	8464.54	9054.18	162656	141508	199508		Unk.50
Unk.51	14.94_595.4709m/z		595.471	14.9415	139520	2.23	43571.4	45508	44164	31114	33943.6	33415.7	31422.6	53287.4	34594.4	69294.4	51111.8	43078.6	108556	135459	174545	9.09772	0	9.87769	2387.88	830.135	505.863	9450.04	7688.01	8798.49	59396.7	47846.2	73286.4		Unk.51
Unk.52	14.94_597.4866m/z		597.487	14.9415	143892	3.33	61230.4	64922.3	60732.2	48526.1	51252.6	48293	107718	189685	134274	88873.7	66521.5	53649.7	88042.5	116851	149484	117.69	33.6628	41.1841	2928.16	1368.31	1141.55	16769.4	15918.2	18046.4	98150.3	82575.5	120979		Unk.52
Unk.53	14.97_599.5019m/z		599.502	14.9684	253660	0.33	65315.7	65693.9	64008	47051.5	47329.9	47315.8	59822.6	94842.9	63605.2	23483.6	18999.2	13257.2	198872	248555	313553	139.462	55.0809	16.0321	2058.78	1818.05	1048.22	4679.38	4393.28	4034.88	73597.9	62826.8	93944.7		Unk.53
Unk.54	15.01_623.5022m/z		623.502	15.0088	118840	3.36	45691	49248.5	46906	31279.8	34670.9	34081	36617.1	48130.5	37388.2	46957.7	36077.5	28464	88820.2	111315	156386	22.2579	0	13.4937	4611.28	2163.07	2030.26	11280.8	10673.6	10627	87043.7	77203.4	104333		Unk.54
Unk.55	15.18_849.6927m/z		849.693	15.1837	454630	3.11	154928	169973	187610	106886	125951	148434	164449	239631	221054	58896.9	43065.2	43485	92649.6	142662	203427	1762.62	677.695	660.925	6345.9	4212.55	6749.78	31000	31113.9	32756.7	539467	357238	467186		Unk.55
Unk.56	15.20_521.4555m/z		521.455	15.1972	60964.4	1.27	28006.9	28669.6	28588.4	20629	21964	21007.3	49670.2	79755.2	53467.9	58928.2	45585.9	39806.1	25142.9	31636.7	48635.6	681.262	632.963	469.889	2782.52	1138.5	1094.75	13738.9	12665	15170.6	44612.6	38086.3	44914.6		Unk.56
Unk.57	15.20_523.4711m/z		523.471	15.1972	188865	3.06	61982.1	65894.7	64059.8	46455.3	49693.4	47964.4	76854.8	115893	74252.4	47363.8	37222	32001.3	148932	189756	227907	1491.23	1319.57	1002.27	3256.56	2948.08	2348.46	25110.7	23744.3	28053	93530.8	79530.1	99448.4		Unk.57
Unk.58	15.24_921.7714m/z		921.771	15.2376	7.68523e+06	0.56	2.34303e+06	2.43404e+06	2.33342e+06	1.77431e+06	1.75599e+06	1.75877e+06	2.5098e+06	3.75881e+06	2.74878e+06	1.37295e+06	1.002e+06	887749	5.91643e+06	7.30897e+06	9.83029e+06	7742.89	3672.99	3837.35	188195	116109	95479	235280	210479	231563	3.69003e+06	3.16079e+06	4.39131e+06		Unk.58
Unk.59	15.24_925.7234m/z		925.723	15.2376	998663	6.3	409803	432947	478965	268613	326472	372067	393780	553706	546338	287220	195586	213083	767677	890655	1.33766e+06	2518.29	835.081	950.569	58354.7	33632.6	27131.6	75043.9	66209.4	71833.6	735986	513812	716404		Unk.59
Unk.60	15.26_547.4711m/z		547.471	15.2645	169143	3.41	52097.6	56950.3	56656.5	43791.5	44866.1	46825.1	90757	139318	90182.4	217386	157725	132318	61474.8	68168.1	86350.5	803.414	643.944	488.96	9264.07	1928.7	1805.26	13549.5	12162.6	14663.3	61817.8	52171.1	67886.7		Unk.60
Unk.61	15.26_549.4867m/z		549.487	15.2645	363777	2.44	170011	178495	174053	136473	147491	144081	304832	475092	311408	447178	331279	298824	273413	356773	412058	2635.5	2122.66	1832.55	18232.6	7009.3	5624.57	49004.7	45455	54010.4	198320	161765	216595		Unk.61
Unk.62	15.33_575.5023m/z		575.502	15.3318	204064	3.75	82754.3	89547.6	88693.8	65303	70312.3	68660.5	102066	121999	88443	266346	189437	156410	143328	164555	223573	1006.95	991.258	741.63	17074.5	5206.33	4830.15	13092.3	12346.5	13973.2	124939	106079	145989		Unk.62
Unk.63	15.37_551.5021m/z		551.502	15.3721	99876.8	2.34	34801.9	36470	35605.5	25003.9	27632.8	27922.1	35289.9	42906.9	29740.4	85027.8	62773.7	57470	16845	24453.6	27693.6	292.686	331.388	262.922	2588.78	1042.7	1229.14	12864.8	11696.9	13505.5	97004.5	84703.6	117922		Unk.63
Unk.64	15.37_597.4866m/z		597.487	15.3721	110914	2.57	45333.6	51143.5	47958.4	36329.6	38247.9	37335.1	47969.1	72245.7	51609.7	92271.6	67099.2	61208.1	86132.1	108996	137612	45.914	17.4834	27.5808	2818.94	951.826	854.716	7082.72	6569.05	7013.55	80468.3	71268.5	94587		Unk.64
Unk.65	15.44_573.4866m/z		573.487	15.4394	128462	3.41	40327.2	41955.5	39206.8	26346.9	29577.2	28700.2	15940.5	21852.9	12837	28183.1	21522.9	15779.5	98275.7	127984	159125	61.1022	10.2003	29.6102	2566.54	1504.9	1223.71	2722.82	2892.27	2387.73	86715.3	72208	100531		Unk.65
Unk.66	15.44_577.5178m/z		577.518	15.4394	113335	4.11	39985.2	42955.4	40085.4	29212.7	33505.3	32078.2	25975.6	36736.4	25806.4	142985	105805	91215.6	54068.6	69995.2	85237.4	277.537	239.127	151.002	4815.13	1546.95	1544.09	8727.29	7928.37	8406.94	75606.2	65483.7	81895.1		Unk.66
Unk.67	15.49_874.7745m/z		874.774	15.4933	1.84664e+06	2.23	484933	483775	465916	357840	346298	339457	296011	381928	253753	391699	313766	266809	1.44475e+06	1.78686e+06	2.30832e+06	3507.43	2710	1760.29	49281.4	24373.2	19967.4	39057.3	37647.8	41243.9	728800	643260	843586		Unk.67
Unk.68	15.49_878.7275m/z		878.728	15.4933	320671	2.8	127182	130995	141697	81957.1	97066.3	110640	76799	93779.6	73812.8	93809.3	78282.8	76832.2	229883	304002	428127	1545.87	1009.13	607.056	16865.6	9613.28	7379.38	18669.9	18024.2	19052.4	228916	163765	218477		Unk.68
Unk.69	15.55_599.5022m/z		599.502	15.5472	117490	3.96	25910.7	23978.8	24615.9	17461.4	19230.7	18632.6	16105	20377.6	13440.6	6365.42	6007.3	4199.93	89474.1	119556	143439	128.871	64.7154	37.4404	1267.09	1015.8	662.458	1217.43	967.837	842.416	28809.5	23374.8	34547.7		Unk.69
Unk.70	15.63_523.4712m/z		523.471	15.628	132559	1.55	48523.2	50614.5	48970	35549.8	36384.3	35332.1	43383.9	50885.9	34516.2	64896.8	50456.8	43222.8	105397	132226	160055	1674.42	1578.46	1220.28	3652.45	2561.11	2727.46	12812.3	13359.5	14932.6	83696.1	73013.9	94675.8		Unk.70
Unk.71	15.68_551.5022m/z		551.502	15.6819	201276	2.18	91688.9	95236.6	95232.5	69068	74056.3	70233	129596	170337	111877	247704	184263	171860	82658.6	105294	120368	2899.27	2506.14	2123.63	9365.51	4696.93	5188.72	25873.9	27190.9	29116.5	182607	164897	214423		Unk.71
Unk.72	15.70_549.4868m/z		549.487	15.6953	442380	3.81	148601	162005	157215	116964	124110	115708	185238	252110	169834	544806	406505	375830	219621	285417	331090	3924.85	3149.35	2344.89	20221.4	6726.07	6124.12	28699.2	29400	32308	186782	158661	216697		Unk.72
Unk.73	15.75_577.5180m/z		577.518	15.7492	279111	2.77	109394	118172	116226	84318.3	88871.7	85352.3	92695.1	115859	78808.1	335590	255299	235174	227878	271523	337931	2086.81	1903.83	1458.95	16306.5	6823.11	5892.72	16336.7	16423.4	17640.8	125904	108551	150951		Unk.73
Unk.74	15.75_903.7382m/z		903.738	15.7492	424454	8.58	216025	239497	267187	147569	187662	218429	302755	397965	281113	423561	286709	283168	326839	385272	561252	3010.55	2453.27	1601.95	46530.5	15868.9	14012.2	52406.7	54594.3	61640	347697	244874	338329		Unk.74
Unk.75	15.78_575.5024m/z		575.502	15.7761	249092	2.52	75918.1	79852.4	79385.2	56867.2	59699.2	57651.8	50396.7	59878.2	41925.2	317297	226858	203121	106197	128624	167805	1509.81	1383.62	989.691	18418.5	4526.65	4467.95	7327.32	7430.53	7723.78	109138	98289	132790		Unk.75
Unk.76	15.80_603.5336m/z		603.534	15.8031	270862	3.02	81011.4	84775.7	79183.2	58707.9	62279	61202.7	59122.6	80589.2	53579.6	158847	116407	103304	221095	271874	319618	787.464	621.179	434.126	14616	5637.99	5446.88	11402.2	10458.8	12010.7	101171	84940.8	114561		Unk.76
Unk.77	15.80_925.8025m/z		925.802	15.8031	1.44404e+07	2.28	3.73043e+06	3.88355e+06	3.73749e+06	2.91322e+06	2.813e+06	2.66659e+06	3.06877e+06	3.99105e+06	2.96331e+06	3.87767e+06	2.71824e+06	2.57118e+06	1.19136e+07	1.35057e+07	1.79019e+07	17724.6	13956.5	14770.3	402952	206839	186008	466897	450574	483696	4.51711e+06	3.87482e+06	5.27268e+06		Unk.77
Unk.78	15.87_1001.8336m/z		1001.83	15.8705	805557	2.55	192657	204503	194692	148075	142707	141059	166442	251222	197639	25117.2	14748.8	19369.9	744242	717274	955156	432.835	314.384	375.034	17435.2	12786.1	12453.1	27889	26420.5	26763.8	269319	226516	308585		Unk.78
Unk.79	15.88_929.7543m/z		929.754	15.884	343094	7.8	150901	169919	189195	105029	134306	157182	199067	231228	144384	224835	225396	256959	260190	322560	446531	907.979	580.894	652.229	42086	15235.1	13827.5	53969	58296.7	64696.9	291657	220248	314931		Unk.79
Unk.80	15.90_601.5180m/z		601.518	15.8975	96692	4.38	24447.6	26602.9	26084.1	18618	19485.8	17587.9	9756.37	11433.2	7933.27	34145.8	26828.2	24225.4	82079.5	89806.2	118190	350.31	458.278	172.114	3932.43	2021.36	1658.97	2023.13	1776.65	1974.36	37815.9	34991.5	46531.1		Unk.80
Unk.81	15.94_902.8062m/z		902.806	15.938	1.18229e+06	1.32	295648	302239	295233	223374	212153	203358	147438	166945	114105	320175	245066	226169	980913	1.10143e+06	1.46452e+06	3673.41	4408.19	2318.21	47628.8	22902	21468.3	26337.2	25642.6	28761.2	415499	360620	478069		Unk.81
Unk.82	15.99_928.8217m/z		928.822	15.992	941504	3.79	184875	190984	177062	139559	130015	118823	72571.2	81173.1	55076.9	67812.6	52662.4	51239.2	796666	860725	1.16712e+06	463.38	362.402	442.184	16185.6	9961.98	8415.26	11445.2	9853.31	11899.8	175107	154102	206244		Unk.82
Unk.83	16.01_931.7710m/z		931.771	16.0055	606915	6.73	213337	237958	242127	153219	174383	191579	290307	452109	306462	233159	170766	177887	454414	567674	798658	1112.27	710.231	813.708	32857.4	13804.5	11746	31685.8	33849.4	38770.4	273558	220167	290792		Unk.83
Unk.84	16.09_551.5025m/z		551.503	16.0866	236899	3.12	78620.5	83669.9	81477.2	57077.8	61908.7	57607.8	64768	73824.5	51800.9	283924	212078	214695	51623.5	67433.6	84146.5	4365.07	4256.52	3101.08	9888.41	4769.5	5905.04	13893.4	15627.3	15794.4	161827	147307	191959		Unk.84
Unk.85	16.09_965.8342m/z		965.834	16.0866	685132	3.21	161347	169919	158690	119938	120592	113723	143063	116934	94243.3	52298	39539.3	39218.4	583312	607753	864333	779.034	939.54	1000.74	39339.8	22953.6	21308.8	30060.2	30770.2	33533.9	210593	180384	232731		Unk.85
Unk.86	16.15_577.5182m/z		577.518	16.1542	340149	3.53	100066	106906	101363	74254.6	79781.9	74917.7	50328.4	56479	39918.8	409304	305775	305368	165984	215466	251554	3820.97	3991.38	2564.99	15386.6	6179.42	5475.39	11166	11945.5	12457.6	115913	108013	145662		Unk.86
Unk.87	16.19_935.8500n	935.85	958.819	16.1947	457753	3.28	127722	137521	136907	105192	112332	108676	362143	608202	402914	163581	131334	131551	130139	149831	204001	2165.38	2049.04	1739.52	22065.2	9851.35	8789.38	31069.1	29602.5	33323.8	143155	119210	152239		Unk.87	M+H-H2O, M+Na
Unk.88	16.22_603.5338m/z		603.534	16.2217	187526	2	61281	66292.4	63421.3	46981	48715.7	47159.7	38068.7	44387.9	31589.3	171655	122468	115916	151371	193627	217580	2353.22	2419.28	1588.43	13920.6	5719.39	5241.15	9780.03	9667.85	10084.2	73739.3	63914.7	85242.7		Unk.88
Unk.89	16.28_941.8344m/z		941.834	16.2758	399041	2.55	79978.1	83334.9	79398.6	58532.5	59351.2	56478.7	87112.4	68101.6	65809.9	25643	16377.8	16422.2	334420	340706	521998	1863.26	1720.02	1579.12	13856.6	8995.14	7633.51	10057.9	10742.9	13227.9	69407.1	61629.6	77280.5		Unk.89
Unk.90	16.33_563.5390m/z		563.539	16.33	51096.2	3.37	25100.5	26772.3	25521	19111.1	21096.9	19747.2	41479.5	68441	43368.2	58795.8	42086.2	34096.2	22844.3	24852.9	34799.9	450.205	385.044	329.245	3490.55	1158.61	1526.23	6399.79	7016.5	7882.18	46434.5	45050.9	61674.2		Unk.90
Unk.91	16.40_891.8194m/z		891.819	16.398	344925	1.33	106955	109572	105202	81906.8	80217.2	79909	114362	76279.7	62544.1	188522	142605	140823	288484	312249	434042	6158.79	5779.97	4275.66	19542.5	11915.5	10874.1	24145.8	25338.1	27489.6	131000	114786	152423		Unk.91
Unk.92	16.85_939.8557m/z		939.856	16.8504	336333	3.39	152239	165019	152697	125658	119745	117773	275192	394951	224547	252040	163545	171080	249108	290880	375605	513.43	614.666	1076.06	14389.7	7178.07	8740.16	37932.2	41777.8	46925.2	294075	302277	412648		Unk.92
Unk.93	17.11_563.5393m/z		563.539	17.1116	35302.6	4.13	13502.6	14820.2	14387.7	11173.6	12079.5	11372.3	31318.3	41684.9	24769.7	45800.6	29249.2	30858.1	9466.95	11595.6	14800.7	176.005	110.863	104.048	1729.02	482.176	693.549	4623.22	5400.64	5660.3	24770.3	26602	34132.4		Unk.93

## Sheet: SPAT_NEG
							BQC_3_Neg	BQC1_Neg	BQC2_Neg	TQC1_Neg	TQC2_Neg	CYL1_NEG	CYL2_NEG	CYL3_NEG	NANNO1_NEG	NANNO2_NEG	NANNO3_NEG	MONO1_NEG	MONO2_NEG	MONO13_NEG	ISO1_NEG	ISO2_NEG	ISO3_NEG	T01_NEG	T02_NEG	T03_NEG	SP1_NEG	SP2_NEG	SP3_NEG	OUT1_NEG	OUT2_NEG	OUT3_NEG
Exact Mass ID	Compound	Neutral mass (Da)	m/z	Retention time (min)	Maximum Abundance	Minimum CV%	QC	QC	QC	QC	QC	CYL	CYL	CYL	NANNO	NANNO	NANNO	MONO	MONO	MONO	ISO	ISO	ISO	T0	T0	T0	SP	SP	SP	OUT	OUT	OUT	Accepted Compound ID	Exact Mass ID	Adducts	Formula	Score	Fragmentation Score	Mass Error (ppm)	Isotope Similarity	Retention Time Error (mins)	Compound Link
CAEP(32:1)	8.39_615.4897m/z		615.49	8.38942	109047	0.69	76617.8	72718.3	72170	59910.1	60496.5	74880.5	132642	119619	105724	102897	100980	37608.6	35034	34135.3	70902	71982.7	60940.1	56489.8	53425.1	49317.5	43495.8	41233.2	45366	96026.5	103820	104114	CAEP(32:1)	CAEP(32:1)	M-H	[C34H70N2O5P]+	48.4	0	2.94993	96.5882	0.03595
CAEP(33:1)a	8.69_629.5055m/z		629.506	8.69192	15831	2.62	8592.74	7525.96	7181.63	7987.95	7630.03	13730.9	16704.2	17057.9	6324.04	6547.82	5820.49	7606.26	6862.28	6997.32	2584.23	2308.05	1780.17	7813.54	8209.17	8137.36	8870.76	8368.34	10149.6	10230.1	12462.6	12002.1	CAEP(33:1)	CAEP(33:1)a	M-H	[C35H72N2O5P]+	42.3	0	2.22546	92.3712	-0.129167
CAEP(33:1)b	8.84_629.5057m/z		629.506	8.84317	15117.7	1.99	8594.68	9059.62	9065.73	8668.63	8915.72	11084.7	14156.6	11745.1	15321.8	15479.5	14551.7	8674.56	6135.47	7800.67	9470.44	8147.84	5885.41	5954.62	5293.78	5528.66	14831.5	12010	17286.1	10995.7	11608.9	11804.6	CAEP(33:1)	CAEP(33:1)b	M-H	[C35H72N2O5P]+	50.4	0	2.46046	93.183	0.0220833
CAEP(34:1)	9.28_643.5211m/z		643.521	9.28318	305161	1.39	109124	106216	107109	91294.1	93391.8	159223	211962	191284	294202	312427	308853	75577.6	65526.6	61237.1	51199.5	57099	54293	54874.9	52441.3	51500.5	85039.2	79652.5	97057.4	105737	113297	113760	CAEP(34:1)	CAEP(34:1)	M-H	[C36H74N2O5P]+	50.9	0	2.63994	96.0503	0.0235
CAEP(34:2)a	8.62_641.5049m/z		641.505	8.62315	297377	1.64	91711.9	87438.7	89198.9	79701.7	77873.6	129496	256781	194890	306634	300796	284700	35698.6	30881.4	31230.3	41675.6	48173.3	33012.9	51183.8	46706.9	47560	85039.2	48846.8	57776.7	98373.5	108085	109313	Pe-Cer(34:1)	CAEP(34:2)a	M-H	[C36H72N2O5P]+	50.7	0	2.47165	95.1464	0.0221167
CAEP(34:2)b	8.90_641.5059m/z		641.506	8.89817	427894	1.53	104460	106468	102998	111373	108986	472603	406704	404376	98546.3	100884	90226.9	96660.9	93729	107808	19956.3	18687	17132.6	97237.2	95062.9	111328	85039.2	82889.5	99138.4	96610.9	110711	121271	Pe-Cer(34:1)	CAEP(34:2)b	M-H	[C36H72N2O5P]+	40.3	0	3.9943	95.4625	0.297133
CAEP(34:3)	8.55_639.4901m/z		639.49	8.5544	339677	0.25	115624	109741	105805	99737.5	99385.2	54564.5	45434.1	45741.7	71217.3	79526.6	75924.3	92024.5	99096.9	97105.7	378502	340288	300240	79272.3	77369.1	78942.7	85039.2	113954	112074	100065	101797	106542	CAEP(34:3)	CAEP(34:3)	M-H	[C36H70N2O5P]+	42	0	4.62005	92.1138	-0.1156
CAEP(35:1)	9.59_657.5370m/z		657.537	9.58572	44722.6	0.13	17106	16761.7	16273.2	17074.4	17042.9	50526.6	41297.6	42343.7	22131.5	24618.4	22592.5	22934.3	18008.7	17691.3	4785.51	4673.74	4291.87	13558.8	13148.7	13858.3	85039.2	22385.3	29306.9	16270.6	18714.4	19555.8	CAEP(35:1)	CAEP(35:1)	M-H	[C37H76N2O5P]+	42.5	0	4.49791	93.776	-0.124283
CAEP(35:2)	9.20_655.5214m/z		655.521	9.20068	146589	0.56	54484.1	52312.3	51348.3	52499.8	52917.6	186183	117777	135806	41779.3	39868.8	37582.6	67199.5	63123.8	62702.4	8003.78	6739.59	7654.71	57548.5	56031.6	57482.7	85039.2	63645.1	66469.7	55281.4	58771.2	62597.7	CAEP(35:2)	CAEP(35:2)	M-H	[C37H74N2O5P]+	50.8	0	2.88147	95.4907	0.02315
CAEP(35:3)	8.88_653.5057m/z		653.506	8.88442	436347	1.42	248987	256583	239641	277699	272186	192286	146950	143189	186488	198515	188438	397743	438818	472478	466348	396303	327627	303070	300927	327141	85039.2	415300	412584	230472	263641	289179	CAEP(35:3)	CAEP(35:3)	M-H	[C37H72N2O5P]+	43.3	0	4.47577	97.5658	-0.115583
CAEP(36:2)	9.60_669.5369m/z		669.537	9.59947	14284.4	0.97	6735.67	6747.12	6374.23	6826.74	6920.9	12463.7	9338.02	9772.71	7528.09	6640.14	5641.95	10817.2	8348.79	9630.52	1382.02	884.89	400.139	7111.39	6901.05	7501.72	85039.2	14790.5	10742.3	7460.74	8541.69	9419.58	CAEP(36:2)	CAEP(36:2)	M-H	[C38H76N2O5P]+	53.3	0	2.74527	89.898	0.00973333
CAEP(36:3)	9.13_667.5215m/z		667.522	9.13193	86098.2	0.32	44137.3	45013.1	41731.5	46271.6	46061.3	27119.8	20924.6	22035.6	26257.2	29390	29901.6	84222.2	92459.8	81612.6	27664.9	25341.7	22106.9	62969.5	58446.8	57779.5	85039.2	78929.7	74292	55952	61930.4	69972.7	CAEP(36:3)	CAEP(36:3)	M-H	[C38H74N2O5P]+	54.1	0	3.44852	94.2163	0.00903333
CAEP(37:3)	9.76_681.5370m/z		681.537	9.76448	10793.7	2.48	3825.84	4019.71	3936.92	4512.74	4703.74	2953.74	2110.19	2569.41	2272.73	2526.39	2407.17	9960.69	10869.1	10245.7	2770.46	3469.62	2280.05	4622.98	4190.07	4130.86	85039.2	12611.1	8414.62	3303.12	3677.05	4098.73	CAEP(37:3)	CAEP(37:3)	M-H	[C39H76N2O5P]+	45.4	0	4.33263	89.8039	0.0544833
CAEP(37:3/2)a	9.24_697.5323m/z		697.532	9.24193	6094.15	4.91	1545.02	1554.34	1370.97	2143.92	1939.35	1097.89	648.626	583.659	515.455	506.232	682.467	6534.16	6281.25	5467.05	331.982	302.565	326.947	2735.49	2624.57	2471.66	85039.2	4612.96	4464.61	1055.92	1167.73	1424.62	CAEP(37:3/2)	CAEP(37:3/2)a	M-H	[C39H76N2O6P]+	41.2	0	4.58799	85.2472	-0.108067
CAEP(37:3/2)b	9.43_697.5321m/z		697.532	9.43445	4003.22	0.83	1062.34	1129.92	1240.98	1493.08	1510.73	1454.46	749.091	972.008	694.931	786.679	736.41	3152.96	2804.66	2942.95	1498.44	2341.23	1439.18	1011.1	767.393	831.93	85039.2	4822.91	2893.09	586.229	662.036	762.503	CAEP(37:3/2)	CAEP(37:3/2)b	M-H	[C39H76N2O6P]+	42.1	0	4.42706	84.2748	0.08445
Cer(32:1)a	9.21_509.4832n	509.483	554.481	9.21443	6782.9	10.01	3003.65	4349.9	4391.27	3080.04	3549.17	5753.82	7230.15	4486.3	4381.14	3834.11	3348.42	829.527	374.433	1032.56	7607.13	6459.7	5909.17	3830.3	2745.81	3690.39	85039.2	1080.01	1583.81	5263.1	6295.93	8789.65	HMDB11773	Cer(32:1)a	M-H, M+Cl, M+FA-H	C32H63NO3	50.9	0	3.0371	90.2697	-0.01785
Cer(32:1)b	10.12_537.5144n	537.514	582.513	10.122	19990.7	3.59	9850.08	13339.2	13386.8	10356.1	10896	13830.7	15378.1	10593.4	17995.5	16792.8	14782.7	7495.52	4925.59	7496.92	20804.8	21431.5	17735.8	11266.6	8380.69	11001.8	85039.2	8822.57	9870.15	11926.3	13838.4	18659.1	HMDB04949	Cer(32:1)b	M-H, M+Cl, M+FA-H	C34H67NO3	52.5	0	2.86445	95.9616	-0.0178
Cer(34:2)	9.72_535.4987n	535.499	580.497	9.72323	23356.6	4.77	4716.67	6678.8	6705.1	5835.45	6242.9	31530.3	21165	17374.5	2830.5	2929.65	2195.75	4774.29	3936.26	6251.88	1660.37	1395.5	1305.96	8850.55	6833.24	9140.39	85039.2	4120.47	4500.59	5374.93	6112.33	9286.76	LMSP02010024	Cer(34:2)	M-H, M+Cl, M+FA-H	C34H65NO3	52.2	0	3.14806	95.5745	-0.0177333
Cer(34:3)	9.35_533.4831n	533.483	578.481	9.35195	11345.4	5.8	2147.25	3249.54	3048.5	2286.51	2538.04	853.213	425.906	251.677	540.42	565.642	606.082	733.159	811.56	1091.61	13557.1	10898.2	9580.94	2058.3	1731.03	2279.91	85039.2	1684.2	1847.51	2315.13	2553.94	3556.96	LMSP02010055	Cer(34:3)	M-H, M+Cl, M+FA-H	C34H63NO3	55.2	0	3.03482	88.9254	-0.00398333
Cer(35:2)	10.03_549.5143n	549.514	594.513	10.0257	11521	9.86	3074.5	4043.36	4308.32	3655.34	4203.11	20606.4	6886.9	7069.66	945.674	927.648	563.091	4190.57	2791.4	4661.46	601.349	254.095	596.244	5787.53	4807.99	6570.96	85039.2	3261.55	3802.09	4641.78	5379.49	7924.61	LMSP02010060	Cer(35:2)	M-H, M+Cl, M+FA-H	C35H67NO3	51.1	0	2.68554	88.9063	-0.0178
Cer(36:3)	9.50_576.5021m/z		576.502	9.50322	2789.94	0.98	1486.59	1557.88	1389.71	1542.41	1633.01	731.496	162.942	185.858	262.293	225.697	342.803	2214.25	2238.3	2383.8	1286.53	1190.96	893.297	2799.34	2759	2811.48	85039.2	2471.03	1806.38	2163.19	2373.28	3354.28	LMSP02010079	Cer(36:3)	M-H	C36H67NO4	43.7	0	2.87161	86.8417	-0.0727667
Cer(38:2)	9.45_535.4987n	535.499	580.497	9.4482	14091.3	1.87	4248.12	5799.06	5790.77	4618.52	4742.5	8846.89	14810	9598.74	15429.8	13357.5	13486.5	503.093	146.641	710.559	1653.94	2183.16	755.273	3649.22	2992.19	4152.46	85039.2	1187.29	2095.02	6874.01	8383.55	10959.4	LMSP02010024	Cer(38:2)	M-H, M+Cl, M+FA-H	C34H65NO3	49.1	0	2.99263	94.1638	-0.0315167
CL(84:20)	14.41_1591.9681m/z		1591.97	14.4121	29118.3	1.87	12585.3	11839.3	12027.6	12469.6	12803.8	9016.47	13700.5	14629.6	14169.9	15800	16909.1	8043.73	10770.9	8464.38	32481	22830.2	32043.8	9350.16	10804.3	8431.57	85039.2	23271.2	22947.2	6151.57	6771.09	3193.73	HMDB59166	CL(84:20)	M-H	C93H142O17P2	51.1	0	2.53251	93.9867	-0.0325
CL(88:23)	14.54_1642.9918n	1642.99	1641.98	14.5359	67485.6	1.42	21536	24225.2	21551.6	24731.9	25232.8	46195	79628.9	76632.9	4581.52	7148.17	6540.53	21926.5	26375.6	24956.3	54840	37732	44951.3	12449	11915.5	10084.3	85039.2	64031.6	49079.7	3026.16	2968.06	2314.49	HMDB59566	CL(88:23)	M-H, M+Na-2H	C97H144O17P2	37.9	0	2.38996	92.1743		http://nonlinear.com/redirect/outbound?p=hmdb&param=HMDB59566
CL(88:24)	14.23_1640.9770n	1640.98	1639.97	14.2334	364633	2.35	154653	154568	148392	162824	168719	90758.6	131116	127800	86929	100544	115539	272867	320363	276569	135714	94226	111957	392601	379595	321703	85039.2	197380	168694	181030	177881	126759	HMDB59569	CL(88:24)	M-H, M+Na-2H	C97H142O17P2	54.1	0	2.35121	97.852	-0.0187
PE-Cer(33:0)	8.55_669.5009m/z		669.501	8.5544	255120	1.01	110940	111623	109435	120867	118105	80885.3	62905.7	66457.8	95346.9	100113	95850.3	204187	211803	200042	262403	256062	246893	117745	117970	113859	85039.2	177045	163057	96599.3	94012.7	100196	PE-Cer(33:0)	CPE(33:0)	M-H	[C37H72N2O6P]+	51	0	3.04552	97.2511	0.0221333
PE-Cer(34:2)a	8.31_657.5003m/z		657.5	8.30692	16059.2	0.71	4064.27	4221.83	4073.09	3465.01	3499.94	5306.44	9559.6	7773.4	17313.2	15903.9	14960.6	1993.76	1613.69	1698.03	1151.97	1582.82	1371.75	1200.45	1184.91	1041.66	85039.2	2575.89	2893.54	3370.47	3579.26	3776.03	LMSP03020006	CPE(34:2)a	M-H	C36H71N2O6P	39.4	0	3.96874	90.2967	-0.2743
PE-Cer(34:2)b	8.57_657.5007m/z		657.501	8.56815	8241.02	0.78	2302.62	2338.65	2319.21	2625.89	2587.05	9252.57	7552.32	7918.17	3575.12	3795.46	3530.02	3879.69	4010.78	4366.76	650.269	745.526	648.881	1414.4	1275.69	1472.12	85039.2	2838.15	3345.42	1819.71	2045.69	2131.35	LMSP03020006	CPE(34:2)b	M-H	C36H71N2O6P	51.5	0	4.52986	89.8957	-0.0130667
PE-Cer(34:3)	8.22_655.4850m/z		655.485	8.2244	15654.2	0.27	5970.15	5820.59	5666.76	5415.14	5394.45	2299.89	1588.13	1607.04	2996.44	2977.05	3172.48	7872.54	8514.62	7492.86	13917.7	14487.7	18557.2	2513.61	2794.49	2518.17	85039.2	8673.64	7354.58	3009.13	2862.4	3044.43	LMSP03020033	CPE(34:3)	M-H	C36H69N2O6P	39.3	0	2.82472	89.4792	-0.294117
PE-Cer(35:0)	8.86_671.5161m/z		671.516	8.85692	9611.74	1.37	3581.33	4064.24	3781.09	4800.18	4708.35	15060.7	6692.19	7082.35	4125.12	3144.74	3348.74	7769.67	6710.43	9666.66	1230.86	902.038	807.473	3876.18	3858.29	4514.89	85039.2	7148.09	7618.33	3569.43	4518.75	4733.69	LMSP03020040	CPE(35:0)	M-H	C37H73N2O6P	39.1	0	4.60908	90.7835	-0.33545
PE-Cer(35:3/2)	8.54_686.5028n	686.503	707.478	8.54067	21504.4	0.41	9118.7	9045.7	9090.48	8383.54	8064.8	4656.71	3973.04	3921.27	5867.12	6636.81	6004.74	9401.46	9784.99	8639.81	21793.8	20960.6	21759	6886.76	6738.8	6755.42	85039.2	9758.62	9582.18	8285.67	7905.94	8220.65	Pe-Cer(35:3/2)	CPE(35:3/2)	M-H, M+Na-2H	[C37H72N2O7P]+	49.2	0	3.52673	89.2892	0.02215
PE-Cer(36:3)a	7.81_699.5113m/z		699.511	7.81188	5680.25	0.32	3525.65	2045.92	2724.59	3265.34	3250.61	2130.89	2452.67	3255.57	2283.41	3161.38	1786.92	5478.6	3448.28	6220.62	291.215	388.032	216.14	4290.88	5479.75	7270.12	85039.2	3946.19	4779.57	4324.4	4414.67	2742.59	LMSP03020090	CPE(36:3)a	M-H	C38H73N2O7P	37.3	0	4.36654	91.5738		http://nonlinear.com/redirect/outbound?p=lipidmaps&param=LMSP03020090
PE-Cer(36:3)b	8.55_683.5161m/z		683.516	8.5544	5618.33	1.8	1647.77	1628.61	1534.61	1869.04	1821.99	1623.03	1553.54	1428.8	1397.44	1532.29	1300.68	3252.98	3048.85	3384.45	5341.8	6568.92	4944.27	523.893	542.872	766.931	85039.2	2486.04	2138.06	1246.27	1152.32	1606.99	LMSP03020051	CPE(36:3)b	M-H	C38H73N2O6P	36.5	0	3.99482	87.2063		http://nonlinear.com/redirect/outbound?p=lipidmaps&param=LMSP03020051
PE-Cer(36:3)c	8.86_683.5163m/z		683.516	8.85692	77105.1	1.07	27384	29796.7	27599.7	34158.2	33643.2	20423.8	13194.4	13025	19048.5	19395.3	21895.2	77826.6	77308.2	76180.5	22171	18290.7	17020.6	42608.7	41363.2	41601.6	85039.2	71532.6	64148.3	27497.9	29172.7	31922.9	LMSP03020035	CPE(36:3)c	M-H	C38H73N2O6P	56.4	0	4.35047	94.6455	0.00298333
PI-Cer(40:0)	12.14_880.6265m/z		880.626	12.1433	4278.61	1.47	1623.13	1655.9	1670.62	1509.2	1470.81	495.476	507.279	266.441	301.429	445.549	543.092	1591.57	1914.47	1578.3	80.0674	152.949	86.1472	3374.23	2759.82	2710.97	85039.2	1005.31	1214.09	4087.82	4138.03	4610	LMSP03030015	CPI(40:0)	M-H	C46H92NO12P	36.7	0	-2.24212	86.4098		http://nonlinear.com/redirect/outbound?p=lipidmaps&param=LMSP03030015
GM1(41:1)	14.04_1613.9499m/z		1613.95	14.0409	15744.6	2.7	5238.5	5045.45	5318.14	5643.92	5401.31	4288.18	7702.47	8020.8	8542.81	10066.5	9634.14	5434.82	6396.01	5793.38	3647.67	2169.7	3220.13	17370.4	15632.5	14231	85039.2	2542.91	3110.43	6539.54	5995.54	4828.97	HMDB11893	GM1(41:1)	M-H	C79H142N2O31	55.8	0	1.81361	89	-0.0048
GT3(36:2)	14.23_1760.9256n	1760.93	1759.92	14.2334	45917	0.71	19228.1	18939.4	17684.9	20672.3	20465.9	10393.7	15611.5	14742.2	8783.79	11145.8	13075.5	34800.4	41672.9	33739.4	16386.4	11237.6	12827.5	48713.2	48859	40178.8	85039.2	23750.3	19711.2	20996.5	21894.8	15781.9	HMDB12071	GT3(36:2)	M-H, M+Na-2H	C81H140N4O37	36.6	0	3.35622	87.0662		http://nonlinear.com/redirect/outbound?p=hmdb&param=HMDB12071
LPC(15:0)	4.46_526.3170m/z		526.317	4.45687	3536.19	3.1	1936.76	QC+G1:AB1	2118.61	1880.61	1996.2	3036.03	1611.7	1751.72	1114.89	1367.96	1288.43	1789.9	1954.95	2593.66	3594.73	3206.71	3807.12	1133.91	1162.91	1093.18	85039.2	2885.78	2828.04	1595.76	1908.44	1825.07	HMDB10381	LysoPC(15:0)	M+FA-H	C23H48NO7P	37.5	0	4.14836	92.2393		http://nonlinear.com/redirect/outbound?p=hmdb&param=HMDB10381
LPC(16:1)	4.28_538.3172m/z		538.317	4.27812	10560.6	1.41	4941.94	5727.64	5578.12	4885.18	4788.62	12375.6	9201.81	10104.4	9085	8686.2	8581.2	2106.77	1953.62	2773.07	3265.23	3820.88	3989.86	6931	7641.14	6135.96	85039.2	2850.53	3072.87	5144.53	5915.43	5529.54	HMDB10383	LysoPC(16:1)	M+FA-H	C24H48NO7P	37.6	0	4.34253	92.9134		http://nonlinear.com/redirect/outbound?p=hmdb&param=HMDB10383
LPC(17:0)	5.05_554.3484m/z		554.348	5.04813	9652.51	2.39	4960.55	5655.11	5519.79	4942.21	5112.24	13604.7	6443.92	8908.85	3007.72	3346.41	2840.42	6269.24	5721.46	7310.3	4121.25	3803.05	4444.13	3881.55	3847.17	3402.75	85039.2	7092.99	6494.83	4568.93	4859.74	5204.89	HMDB12108	LysoPC(17:0)	M+FA-H	C25H52NO7P	37.8	0	4.0965	93.8873		http://nonlinear.com/redirect/outbound?p=hmdb&param=HMDB12108
LPC(18:0)	5.45_568.3643m/z		568.364	5.4469	22567.6	0.39	11205.3	12558.5	12211.4	9825.72	9880.15	21835.2	22738	23129.8	7387.57	8802.36	8338.01	7542.7	8309.35	10520.3	7194.24	8140.02	8967.48	6655.74	6871.55	5814.75	85039.2	6862.63	5846.5	16471.3	16825.8	18934.3	HMDB10384	LysoPC(18:0)	M+FA-H	C26H54NO7P	37.7	0	4.48745	93.6596		http://nonlinear.com/redirect/outbound?p=hmdb&param=HMDB10384
LPC(18:1)	4.95_566.3486m/z		566.349	4.95188	31478.9	0.34	20040	22313.1	22171.1	18114.8	18201.4	28209	23748.2	27252.3	32062.5	32335.4	30038.9	10197.1	10289.2	13703.6	25824	25200.5	31015.3	13804.4	14109.5	11774.3	85039.2	19191.2	20546.3	20512.5	22190.8	22237.2	LMGP01050029	LysoPC(18:1)	M+FA-H	C26H52NO7P	44.5	0	4.45458	94.0985	-0.0403833
LPC(18:2)	4.54_564.3329m/z		564.333	4.53938	4613.26	6.24	2161.34	2342.27	2447.37	1823.22	2012.27	2031.78	1324.39	1246.78	3237.29	2838.87	2430.33	592.242	515.578	705.65	4535.29	4958.9	4345.6	1523.46	1478.86	1321.46	85039.2	1385.17	1461.57	2349.38	2781.07	2715.74	LMGP01050034	LysoPC(18:2)	M+FA-H	C26H50NO7P	43.3	0	3.34899	91.1874	-0.0457833
LPC(20:1)	5.57_594.3803m/z		594.38	5.57063	17753.8	0.56	10205.2	11086	10565.2	8980.11	8909.63	10904	9985.63	9608.38	11252.8	12775.5	10608.2	4740.05	5180.94	6434.57	16413.5	18342.9	18504.8	5859.83	5454.16	5155.01	85039.2	8105.11	8580.88	11504.1	11377.4	12441	HMDB10391	LysoPC(20:1)	M+FA-H	C28H56NO7P	37.4	0	4.80324	92.8057		http://nonlinear.com/redirect/outbound?p=hmdb&param=HMDB10391
LPC(20:2)	5.16_592.3646m/z		592.365	5.15813	7583.82	0.38	3555.62	4076.12	3879.17	2968.74	2816.21	1715.36	1293.14	1347.33	2319.35	2296.97	2085.3	1543.52	1382.11	1559.51	7561.8	7616.76	7572.9	2007.84	1981.5	1890.53	85039.2	2478.72	2460.87	5484.19	5942.51	6331.83	LMGP01050132	LysoPC(20:2)	M+FA-H	C28H54NO7P	42.7	0	3.49802	91.473	-0.0596833
LPC(20:4)	4.54_588.3332m/z		588.333	4.53938	9133.01	5.07	1480.56	1684.3	1817.41	1890.98	2031.72	9976.74	8924.6	8497.69	7512.83	6897.9	5428.42	2358.31	1646.76	1620.23	290.043	232.085	162.932	563.153	462.581	401.407	85039.2	2217.91	2061.27	84.7083	55.476	81.8205	LMGP01050048	LysoPC(20:4)	M+FA-H	C28H50NO7P	43.5	0	4.32666	91.9247	0.0413667
LPC(20:5)	4.14_586.3175m/z		586.317	4.14062	17584.8	0.45	4339.13	4717.29	4434.13	5546.81	5582.39	7977.49	6105.83	5221.03	17478.5	13972.9	11223.1	4508.01	3422.87	3738.56	1402.53	1021.34	705.199	18438.9	16435.4	17880.1	85039.2	2708.5	2905.12	4358.04	3697.31	4772.01	LMGP01050050	LysoPC(20:5)	M+FA-H	C28H48NO7P	37.5	0	4.51043	92.6274		http://nonlinear.com/redirect/outbound?p=lipidmaps&param=LMGP01050050
LPC(22:5)	4.88_614.3489m/z		614.349	4.88313	2312.72	0.72	1114.39	1122.82	1130.64	820.761	932.852	1787.44	1386.96	1250.1	211.053	234.084	126.786	784.041	625.699	754.688	2008.67	2753.78	2175.7	208.542	235.811	188.411	85039.2	2382.1	2036.32	55.8557	38.3167	32.5889	HMDB10403	LysoPC(22:5)	M+FA-H	C30H52NO7P	38.4	0	4.36505	90.0188	0.2567
LPC(22:6)	4.51_612.3331m/z		612.333	4.51188	23738.8	2.79	11566.2	12554.9	11675.4	10558.2	10982.7	7798.77	4151.83	3665.99	4551.6	4392.2	3480.35	12283.6	10493.6	9420.02	19563.7	19179.8	14499.4	25328	22583.7	23304.8	85039.2	11125.8	10753.2	10058.9	10069.2	11161.4	LMGP01050056	LysoPC(22:6)	M+FA-H	C30H50NO7P	41.7	0	4.25486	92.5065	0.0688833
LPC(O-16:0)	5.08_526.3535m/z		526.354	5.07563	18247.6	1.28	7656.27	8366.05	8358.74	5965.97	6074.57	3711.87	4186.49	4036.29	8336.88	8398.4	7333.94	5055.3	5729.66	5947.27	2680	1692.32	1680.59	3914.73	3533.95	3379.2	85039.2	4155.01	4150.34	16635	20935.7	17172.1	LMGP01060010	LysoPC(O-16:0)	M+FA-H	C24H52NO6P	42.6	0	4.17886	94.4317	-0.0679167
LPE(18:0)	5.53_480.3114m/z		480.311	5.52938	10382.4	1.65	5433.51	6240.57	6108.57	4962.96	5080.06	8071.26	6892.09	5818.67	4423.81	4939.87	4179.26	2650.93	2813.02	3076.24	4322.37	4119.57	5565.68	6707.88	6302.61	6459.6	85039.2	3094.81	2669.24	9574.84	9932.17	11640.1	LMGP02050001	LysoPE(18:0)	M-H	C23H48NO7P	54.5	0	3.01674	93.2677	-0.00475
LPE(18:1)	5.34_478.2958m/z		478.296	5.3369	6410.71	1.19	3149.06	2325.73	2867.38	2899.14	2850.94	6190.8	6804.82	6236.5	6391.99	6051.48	4465.7	2843.9	1835.25	3269.35	1944.38	2583.29	4099	2019	2430.82	3078.65	85039.2	2506.58	2404.06	2109.41	2135.54	1688.17	LMGP02050004	LysoPE(18:1)	M-H	C23H46NO7P	39	0	3.13576	92.1209	0.297883
LPE(20:0)	5.45_509.3500n	509.35	530.327	5.4469	5332.02	0.97	4740.16	3412.18	3740.27	3427.58	3475.06	4499.98	6063.66	4911.99	2934.25	3552.17	2608.77	4319.39	3288.64	4916.72	2266.42	2970.52	2998.25	3269.36	3975.15	4773.95	85039.2	2742.47	3306.49	5397.26	5614.56	4984.25	HMDB11511	LysoPE(20:0)	M-H, M+Na-2H	C25H52NO7P	37.5	0	3.67851	91.6032		http://nonlinear.com/redirect/outbound?p=hmdb&param=HMDB11511
LPE(20:1)a	4.95_506.3270m/z		506.327	4.95188	5192.71	5.87	4705.88	3836.29	3643.08	3310.6	3046.72	4874.18	5349.83	4437.72	5248.08	5589.58	4740.48	1559.9	1561.17	2266.45	4328.08	4159.6	5236.71	2157.81	2156.91	1836.79	85039.2	3236.61	3461.22	3414.48	3745.02	3904.55	HMDB11482	LysoPE(20:1)a	M-H	C25H50NO7P	37.5	0	3.6179	91.6896		http://nonlinear.com/redirect/outbound?p=hmdb&param=HMDB11482
LPE(20:1)b	5.65_506.3271m/z		506.327	5.65313	9191.61	1.04	5506.36	4281.6	4933	5273.4	5351.89	5414.36	6133.64	5952.87	4274.64	4642.71	3403.31	8767.88	6188.51	9372.47	5699.13	7156.6	6663.57	3827.32	4329.46	5768.51	85039.2	7734.61	9838.12	4138.39	3905.46	3436.84	LMGP02050020	LysoPE(20:1)b	M-H	C25H50NO7P	48.8	0	3.09719	92.2308	-0.0185333
LPE(20:2)	5.32_504.3117m/z		504.312	5.32315	17441.4	1.2	12704.1	8610.12	10536.4	10946.5	10762.3	13284.9	15787.2	18083	19305.5	20295.8	12722.8	17179.1	11231.8	16242.8	8530.72	11600.9	10508.3	8357.15	9612.81	12998.7	85039.2	13636.5	16333.3	10271	9701.94	6813.51	PE(20:2)	LysoPE(20:2)	M-H	[C25H49NO7P]+	42.7	0	4.33948	93.2556	0.06315
LPE(20:4)	4.62_500.2803m/z		500.28	4.62188	17264.9	0.54	2998.67	2059.73	2462.83	3246.94	3271.97	14222.4	16634.5	20937.7	10246	10563.6	6770.42	2779.83	1773.56	3070.47	606.262	649.955	520.008	630.87	672.887	924.932	85039.2	2230.66	2598.09	370.532	307.049	249.592	HMDB11517	LysoPE(20:4)	M-H	C25H44NO7P	37.6	0	4.04731	92.5405		http://nonlinear.com/redirect/outbound?p=hmdb&param=HMDB11517
LPE(20:5)	4.22_498.2646m/z		498.265	4.22312	7773.35	1.24	3428.35	2341.71	3155.61	3288.43	3231.16	2938.59	3720.52	4325.87	8869.06	8729.15	5721.86	3490.95	2094.49	3885.51	1002.4	1211.01	1057.77	5393.83	5851.5	8101.85	85039.2	1842.67	2531.37	4820.34	4155.94	3647.96	HMDB11489	LysoPE(20:5)	M-H	C25H42NO7P	37.6	0	4.01418	92.7501		http://nonlinear.com/redirect/outbound?p=hmdb&param=HMDB11489
LPE(22:2)	5.87_532.3430m/z		532.343	5.87313	9161.23	1.26	8238.99	4948.25	6353.53	6618.25	6501.59	7445.02	9501.39	10537.3	6643.57	7296.92	4749.22	10101.2	6587.51	9910.34	4736.58	6743.5	5946.07	6491	7868.2	10439.5	85039.2	7357.64	10323.4	7558.18	6868.85	4546.65	PE(22:2)	LysoPE(22:2)	M-H	C27H53NO7P+	43	0	3.7219	92.2201	0.0631333
LPE(22:5)	4.95_526.2960m/z		526.296	4.95188	3660.06	1.98	2051.89	1463.87	1742.75	1828.97	1778.36	2951.16	3826.89	4202.15	1159.1	1333.92	701.759	1511.81	868.821	1525.01	3144.73	3958.61	3217.93	1498.45	1537.45	2427.51	85039.2	2282.55	2750.32	958.687	861.531	582.299	HMDB11494	LysoPE(22:5)	M-H	C27H46NO7P	37.1	0	3.89482	89.9458		http://nonlinear.com/redirect/outbound?p=hmdb&param=HMDB11494
LPE(22:6)	4.58_524.2803m/z		524.28	4.58063	9318.74	0.35	4511.14	3876.03	4374.07	3783.28	3802.21	2112.6	1970	2004.18	1526.13	1745.96	1117.15	3140.7	1937.51	2756.44	4963.53	6137.19	4973.9	8984.39	8728.64	10243.2	85039.2	2283.73	2875.6	5567.88	5509.47	4719.41	HMDB11496	LysoPE(22:6)	M-H	C27H44NO7P	37.5	0	3.797	92.0499		http://nonlinear.com/redirect/outbound?p=hmdb&param=HMDB11496
LPE(O-17:1) LPE(P-17:0)	5.50_450.3008m/z		450.301	5.50188	3160.6	2.38	1731.01	2250.28	1989.08	1931.21	1850.14	4058.82	2291.52	1927.55	3274.08	2757.27	2803.6	1850.27	1764.49	1803.79	3019.52	1603.59	1933.2	1173.25	1017.6	1258.21	85039.2	3517.56	2566.71	1254.37	1452.65	1713.58	PE(P-17:0)	LysoPE(O-17:1) LysoPE(P-17:0)	M-H	[C22H47NO6P]+	54.3	0	2.98244	92.1735	-0.00473333
LPE(O-18:1) LPE(P-18:0)	5.83_464.3163m/z		464.316	5.83188	30596.6	0.17	19022	23411	20915.2	17205.4	17246.4	33813.5	24279.2	21334	33189	27997.5	30603.3	14401.6	15323.7	13335.5	21223.3	18434.4	22688.1	15828.3	13305.4	15138.2	85039.2	16754.4	12626	21892.3	25393.7	28374.9	LMGP02060004	LysoPE(O-18:1) LysoPE(P-18:0)	M-H	C23H48NO6P	49.5	0	2.96665	94.8199	-0.01855
LPE(O-20:2)	5.96_490.3322m/z		490.332	5.95563	7759.23	0.91	4520.4	5549.84	5087.68	4581.29	4522.57	8704.73	6600.73	5172.01	5263.47	4331.03	4625.37	5176.43	5344.03	4452.82	4831.57	4407.3	3707.62	3564.75	2955.48	3248.64	85039.2	8275.72	6832.99	4396.33	5132.82	5669	PE(O-20:2)PE(P-20:1)	LysoPE(O-20:2)	M-H	[C25H51NO6P]+	42.3	0	3.85408	93.1936	-0.0843667
LPS(22:2)	5.47_576.3331m/z		576.333	5.4744	4371.19	4.11	2275.91	2274.15	2929.43	1937.87	2053.79	1561.92	3807.1	4536.28	3982.28	3845.98	2701.51	5262.27	3497.53	4353.76	614.412	1780.46	1597.84	1965.97	2198.33	2834.24	85039.2	3693.75	4715.48	2539.97	2134.27	1148.91	PS(22:2)	LysoPS(22:2)	M-H	C28H53NO9P	41.4	0	3.89761	90.8143	0.0844
PA(42:10)	8.55_768.4758n	768.476	767.469	8.5544	26449.7	1.55	12454.2	13959.8	13364.4	14442.5	14128.4	10585	10266.6	10263	15306.8	14712.2	13869.4	27664.6	29136	22548.6	15714.1	19083.5	22644.1	15199.3	14947.7	13070.9	85039.2	22273.3	19960.9	13043.7	11866.5	11726.1	LMGP10010646	PA(42:10)	M-H, M+Na-2H	C45H69O8P	36.1	0	3.6895	84.7306		http://nonlinear.com/redirect/outbound?p=lipidmaps&param=LMGP10010646
PA(O-40:7) PA(P-40:6)	10.00_731.5056m/z		731.506	9.99823	3301.33	4.19	1718.64	1858.71	1837.76	1654.5	1540.31	1035.71	263.635	482.528	498.757	631.961	720.92	1237.02	1684.1	1617.45	2770.57	2138.59	2496.25	2610.99	2323.44	2320.42	85039.2	1496.32	1118.75	2605.7	3264.8	4033.48	LMGP10030090	PA(O-40:7) PA(P-40:6)	M-H	C43H73O7P	47.1	0	2.61376	86.2773	0.0372167
PC(30:1)	8.44_748.5169m/z		748.517	8.44442	14404.3	0.03	6197.25	6198.95	6200.88	6918.56	7598.31	13508.1	15697.1	14007.6	10992	11413.6	10093.5	3586.59	3094.62	4618.17	8276.71	9399.44	7430.12	11759.7	13060.1	11657.8	85039.2	4335.98	5328.35	3581.45	3968.79	4694.11	LMGP01010485	PC(30:1)	M+FA-H	C38H74NO8P	42.5	0	4.77328	93.8173	-0.1094
PC(31:0)	9.59_764.5479m/z		764.548	9.58572	9371.18	2.21	5387.54	4640.51	4576.07	5246.02	5084.74	6767.2	5568.9	6278.85	3461.34	4872.3	3805.8	7265.16	6571.39	6576.04	10541.5	8386.48	7414.83	3448.77	4198.08	4477.08	85039.2	9460.6	8942.24	2841.35	3011.95	3131.22	LMGP01011346	PC(31:0)	M+FA-H	C39H78NO8P	42.9	0	4.51187	88.2736	-0.08655
PC(32:0)	10.01_778.5646m/z		778.565	10.012	44907.1	0.22	21000.1	18910.1	18405.4	18518.3	18461.4	30267.7	33946.8	34905.1	43400.1	48614.6	42706.6	16940.9	15193.6	15723.5	26624.4	22976.8	20994.9	11074.8	12474.9	12358.3	85039.2	18399.2	17699	18790.9	20323.9	21480.8	LMGP01011267	PC(32:0)	M+FA-H	C40H80NO8P	43	0	4.68399	95.9095	-0.1278
PC(32:1)	9.32_776.5483m/z		776.548	9.32443	98821.7	0.94	50807	43622.1	44959.5	45533.7	46140.1	79425.6	103774	104275	100848	98461.7	97155.4	37582.4	34978.4	36165.8	46644.1	48748.4	45753.3	54421	60600.6	53947.3	85039.2	37408	42041.3	34524.5	33918.4	35506.3	HMDB07904	PC(32:1)	M+FA-H	C40H78NO8P	38.6	0	4.93963	98.7285		http://nonlinear.com/redirect/outbound?p=hmdb&param=HMDB07904
PC(32:2)	8.73_774.5327m/z		774.533	8.73317	20938.6	1.98	9915.38	9084.86	8998.99	9536.99	9807.74	14746	21552.4	20817	12075.3	12166.8	11682.7	6247.35	5557.27	6147.57	24202.7	21261.2	17351.9	11259.7	12277	11349.3	85039.2	6534.54	8094.36	5229.55	5481.96	5692.92	LMGP01011414	PC(32:2)	M+FA-H	C40H76NO8P	54.6	0	3.1914	95.8417	0.00835
PC(32:3)	8.17_772.5169m/z		772.517	8.1694	23006.8	3.9	5633.36	5311.5	5237.46	4639.7	4284.71	4176.96	6045.19	6311.16	174.719	295.388	119.792	1770.04	1107.62	1254.37	22220.3	24771.2	22028.8	2314.54	2741.86	2355.29	85039.2	1234.74	1252.05	1670.56	1935.87	1989.38	LMGP01011369	PC(32:3)	M+FA-H	C40H74NO8P	43.4	0	3.16491	93.1382	-0.0877833
PC(32:4)	7.80_770.5012m/z		770.501	7.79813	25845.8	0.37	6085.23	5124.35	5152.78	4263.27	4240.9	726.345	1503.31	999.117	30.1706	24.6521	0	265.075	204.196	285.627	25209.9	26904.8	25422.8	4382.36	4798.11	4340.67	85039.2	602.172	399.195	4193.23	3829.07	4434.2	LMGP01010568	PC(32:4)	M+FA-H	C40H72NO8P	44.3	0	3.28853	95.0961	-0.0739833
PC(33:0)	10.31_792.5795m/z		792.579	10.3145	12465.1	2.18	3662.86	3472.44	3628.11	4678.29	4535.95	13147.2	11191.2	13056.9	2827.25	3594.93	2747.05	8128.76	6865.17	7650.75	3347.15	2747.19	1849.74	2858.57	3473.47	3372.68	85039.2	8071.67	8200.39	1663.64	1707.7	1975.89	LMGP01011583	PC(33:0)	M+FA-H	C41H82NO8P	41.1	0	4.40621	83.3343	-0.1141
PC(34:1)	10.20_804.5797m/z		804.58	10.2045	154861	1.13	46061.5	41345.1	41816.5	40545.2	41200	41740	46520.2	45641.7	155902	152259	156424	33302.8	34827	35265.4	62150.6	65831	67322.5	16494.5	17710.3	16311	85039.2	42972.7	44854.3	20791.7	20303.8	22008.9	LMGP01011732	PC(34:1)	M+FA-H	C42H82NO8P	43.7	0	3.06607	97.1389	-0.1279
PC(34:4)	8.66_798.5328m/z		798.533	8.66442	151443	1.08	52256.3	44979.2	46009.8	37993.8	37417.7	38102.2	45423.2	42960.7	8492.27	8068	7816.13	8953.53	7154.07	7365.93	155252	159198	139878	37634.2	40485.4	35123.1	85039.2	12303.7	10606.5	65003.1	58159.2	64747.3	LMGP01010506	PC(34:4)	M+FA-H	C42H76NO8P	44.4	0	3.61657	97.4984	-0.0879167
PC(34:5)	9.71_852.5797m/z		852.58	9.70947	175271	1.9	52342.4	47214.9	47668.7	54309.6	52671.1	144049	194617	187147	102803	98996.5	100569	54095.9	51028.9	42830.6	34120.1	38652.6	35770.6	40425.1	41284.1	39640.1	85039.2	59190.9	61411.7	25604.4	23409.4	26044.6	HMDB08692	PC(34:5)	M+FA-H	C46H82NO8P	40.9	0	3.40793	97.3618	-0.320333
PC(35:5)	8.61_810.5329m/z		810.533	8.6094	14569.6	1.16	7934.52	6657.58	6682.85	9134.57	8985.79	11244.7	10583.4	10341.7	12967.6	12120.8	11187	14199.2	12270.3	11831.6	9259.79	8595.76	8027.6	14772.2	14755.1	14181.6	85039.2	11551.9	12097.9	6574.94	5859.25	6581.58	HMDB08494	PC(35:5)	M+FA-H	C43H76NO8P	44.8	0	1.86817	93.8549	-0.07415
PC(36:2)a	10.37_830.5956m/z		830.596	10.3695	35242.7	1.42	19743.8	16314.9	16367	17758.4	16957	14857.4	19744.2	17804.3	32674.4	32660.3	33479.9	15077.4	14957.2	13706.1	34305.4	35997	35425.5	8237.04	9484.01	8980.36	85039.2	22693.9	26825.7	11516.9	12402.9	11775.9	LMGP01010858	PC(36:2)a	M+FA-H	C44H84NO8P	40.1	0	3.08995	93.5768	-0.3617
PC(36:2)b	10.60_830.5957m/z		830.596	10.6033	27643.3	1.23	11196.9	10457.7	11085.1	8712.3	9821.39	4663.41	4859.21	4511.63	12480	12676.7	13643.9	10241.9	8348.18	8486.89	27185.7	30088.8	25655.3	5070.71	5111.31	4988.86	85039.2	11101.4	12283.9	9702.8	9217.5	9643.2	LMGP01010858	PC(36:2)b	M+FA-H	C44H84NO8P	43.3	0	3.23181	94.9194	-0.1279
PC(36:3)	9.92_828.5799m/z		828.58	9.91573	50174.2	0.8	21111.6	19177.2	19130.4	17650.2	17850.1	19833.7	23962.1	22572.2	20772.8	21068	20370.9	13393.1	11553	11391.1	51359.2	53495	45668.4	9680.01	10704.1	9100.09	85039.2	22919	24390.3	15314.9	15167.8	15538.7	LMGP01010624	PC(36:3)	M+FA-H	C44H82NO8P	42.7	0	3.04491	87.8885	-0.100267
PC(36:6)a	8.35_822.5330m/z		822.533	8.34817	37497.1	0.42	14574	12295.7	13226.4	14705.9	14793.8	15422.1	27688.9	25358.6	33120	27447.3	29880.8	11863.5	9670	8057.06	12579.4	12423.7	12549.2	39407.8	38440.7	34642.8	85039.2	7678.23	8746.28	11109	9203.22	10804.6	HMDB08722	PC(36:6)a	M+FA-H	C44H76NO8P	44.2	0	2.07336	95.5291	-0.0878167
PC(36:6)b	8.60_822.5329m/z		822.533	8.59565	138184	0.3	33227.6	29343.7	30439.2	28830.6	28708.8	10999.3	11036.5	10769.9	4236.2	4181.64	4478.21	16227	14328.2	13381.4	157661	137301	119590	52920.6	51434.6	48298.2	85039.2	19412.5	17398.3	21737.8	19284	20362.2	HMDB08722	PC(36:6)b	M+FA-H	C44H76NO8P	42.9	0	3.06806	89.6257	-0.0879
PC(36:7)	7.69_820.5172m/z		820.517	7.68813	6253.08	1.41	1091.47	1063.33	1067.66	1085.22	1148.94	249.392	843.099	504.38	0.294974	48.2358	70.2046	59.0758	25.0261	98.7711	5834.65	6282	6642.59	936.879	1028.18	1154.62	85039.2	35.6388	73.6753	949.587	809.207	864.592	LMGP01011408	PC(36:7)	M+FA-H	C44H74NO8P	39.4	0	2.96908	85.7859	-0.183983
PC(37:6)	9.04_836.5478m/z		836.548	9.03568	42443.9	1.75	17759.7	15893.4	15777.9	19256.6	19740.4	12579.9	8892.57	8115	6108.31	6138.2	6432.98	31387.7	27802.7	29870.3	51082.2	39548	36701.6	23990.3	23055.2	25661.3	85039.2	33369.1	36106.3	12870.3	12325.2	13953.9	HMDB07958	PC(37:6)	M+FA-H	C45H78NO8P	44.5	0	3.19923	92.6583	-0.07355
PC(38:2)	11.26_858.6268m/z		858.627	11.2633	30066.8	2.08	15569.9	13415.8	13424.2	13884.9	13321.2	14161.5	13933.8	13026.3	17041.9	17448.6	18460.5	16783.7	14101.3	13221.8	27894.7	31546.5	30759.4	9556.86	10841.1	10037.6	85039.2	15612.9	18880.8	11561.7	11976.7	12000.4	LMGP01010790	PC(38:2)	M+FA-H	C46H88NO8P	37.8	0	4.67374	94.4241		http://nonlinear.com/redirect/outbound?p=lipidmaps&param=LMGP01010790
PC(38:3)	10.70_856.6112m/z		856.611	10.6995	34896	0.38	15682.2	13187.5	13450.5	13047.6	13118.4	8237.04	9615.24	8235.86	13667	13873.1	15016.1	14097.7	11998.1	11322.7	33813	38637.5	32237.4	8036.16	9365.43	8706.19	85039.2	18112.1	20873.8	11230.1	11079.3	11218.9	LMGP01011794	PC(38:3)	M+FA-H	C46H86NO8P	37.6	0	4.7349	93.4337		http://nonlinear.com/redirect/outbound?p=lipidmaps&param=LMGP01011794
PC(38:4)	10.45_854.5954m/z		854.595	10.452	136472	1.58	19846.2	17442.1	19108.9	20419.1	20879.8	109904	150472	149040	30786.8	29931.4	32593.3	20780.1	19160.5	17879.6	4212.76	3931.7	4109.72	2810.5	2900.75	2587.52	85039.2	17889.5	15039.9	1467.34	1232.49	1510.41	LMGP01010804	PC(38:4)	M+FA-H	C46H84NO8P	38	0	4.60678	95.5445		http://nonlinear.com/redirect/outbound?p=lipidmaps&param=LMGP01010804
PC(38:5)b	9.92_852.5795m/z		852.579	9.91573	136330	1.36	73110.6	63742.6	65898.2	66075.5	68608.9	115683	154146	139162	75335.3	74807.8	80329.5	70864.4	61622	57845.5	104410	106232	103429	76711.8	74767	70023.4	85039.2	75738.5	70836.4	57590.3	50387	60771.3	HMDB08692	PC(38:5)	M+FA-H	C46H82NO8P	43.6	0	3.08205	95.254	-0.114067
PC(38:7)	9.19_850.5640m/z		850.564	9.18693	135852	0.69	60057.9	51600	52195.6	59420.3	58842.8	73325	104241	93246.9	140684	129039	137833	65635.3	54180.1	49687.8	38898.5	36478.3	39286.2	94041.5	90507.1	86409.7	85039.2	64318	74712.8	52954.7	44676.9	52097.2	LMGP01012140	PC(38:7)	M+FA-H	C46H80NO8P	45.1	0	2.04581	97.3548	-0.0864667
PC(38:8)	8.06_846.5319m/z		846.532	8.0594	3680.15	4.41	1541.58	1291.16	1432.12	1535.64	1373.27	679.956	1131.35	879.92	100.501	102.444	132.864	641.74	416.32	420.633	3647.32	3150.62	4242.5	3007.54	2849.06	2757.51	85039.2	704.245	645.775	2418.83	1984.22	2166.85	HMDB08502	PC(38:8)	M+FA-H	C46H76NO8P	41.8	0	2.35067	84.4823	-0.0877667
PC(40:3)	11.40_884.6427m/z		884.643	11.4008	9325.63	2.1	3893.45	2926.22	3039.88	3869.03	3508.68	1942.56	2117.53	1656.58	2023.71	1847.03	2191.74	6145.38	4734.74	4830.85	8671.85	10091.9	9213.15	1399.23	1209.68	1596.26	85039.2	5849.82	7791.37	2296.87	2383.92	2301.44	LMGP01011799	PC(40:3)	M+FA-H	C48H90NO8P	41.3	0	3.51193	85.8256	-0.1419
PC(40:5)a	10.58_880.6113m/z		880.611	10.5758	52998.8	0.63	13313.6	11885.6	12688	13971.6	14096.9	41808.1	61510.1	55678.1	32230.3	33996.3	32612.5	19462.6	16688.7	15145.3	7711.6	7308.51	7076.07	4668.06	4923.08	4874.61	85039.2	19834.1	19511.1	2771.93	2466.13	2852.98	LMGP01010816	PC(40:5)a	M+FA-H	C48H86NO8P	43.3	0	3.11319	94.5161	-0.1279
PC(40:5)b	10.86_880.6114m/z		880.611	10.8645	5119.89	4.35	1799.83	1548.23	1958.78	2099.18	1973.87	4268.1	5675.88	5415.69	257.302	523.173	329.018	1952.41	1762.35	1977.35	4666.47	5535.24	4847.11	161.895	215.643	203.766	85039.2	4905.39	4391.74	96.4745	22.4669	32.8734	LMGP01010816	PC(40:5)b	M+FA-H	C48H86NO8P	40.4	0	3.24634	84.5313	0.1608
PC(40:6)a	10.04_878.5955m/z		878.596	10.0395	60121.3	1.21	34774.9	29747.3	29775	35049.2	34279.6	35921.3	52148.7	44606.1	60772	59327	60264.9	36941.9	31874.3	28915.1	42309.6	43560.8	43435.1	41004.4	40025.8	40456.2	85039.2	48234.5	51023.7	26330.3	22404.4	26412.2	HMDB08696	PC(40:6)a	M+FA-H	C48H84NO8P	43.5	0	1.39996	94.5578	-0.1278
PC(40:6)b	10.31_878.5955m/z		878.596	10.3145	51817.5	0.19	23950	21364.4	21545	23404.3	23341.3	15393.3	18134.4	17111	6310.06	5888.98	6891.14	56067.7	52872.3	46512.6	35423.8	43780.1	37797.7	23904.5	22664.5	21262	85039.2	31752.5	34222.6	25027	21193.6	23634.6	HMDB08727	PC(40:6)b	M+FA-H	C48H84NO8P	43.1	0	3.22678	94.1501	-0.1279
PC(40:7)	9.60_876.5798m/z		876.58	9.59947	131903	1.19	57702.8	49721.1	51235.6	53926	54840.2	23199.8	26675.3	23015.3	19879.5	20759.1	20924.1	67717.4	57264.1	50798.6	140377	125875	129457	61330.9	60011	56668.1	85039.2	91405.5	99862.1	48204.6	42810.9	48820.2	HMDB08729	PC(40:7)	M+FA-H	C48H82NO8P	44.9	0	3.22062	96.8903	-0.08655
PC(40:8)	9.01_874.5642m/z		874.564	9.00818	22442.6	0.47	6932.82	6069.94	5599.1	5678.25	5716.38	4028.63	7965.93	8694.67	2088.59	2047.69	1955.03	2598.76	1828.67	1898.43	26141.7	20633.5	20552.5	6293.02	6583.3	6456.28	85039.2	4185.94	3905.29	5614.01	5079.15	5681.05	LMGP01011890	PC(40:8)	M+FA-H	C48H80NO8P	43.1	0	3.44943	89.8381	-0.08735
PC(40:9)	8.47_872.5488m/z		872.549	8.47192	20708.7	1.7	5213.94	4764.69	4794.78	4388.02	4283.52	4479.34	8925.11	9384.1	5417.14	4806.33	4460.3	1079.03	755.675	989.768	22924.1	19111.8	20090.1	3114.64	2748.28	2884.09	85039.2	1331.77	1054.97	2557.61	2361.21	2622.69	LMGP01011948	PC(40:9)	M+FA-H	C48H78NO8P	42.6	0	3.28499	93.3171	-0.11535
PC(42:11)	8.40_896.5488m/z		896.549	8.40317	8626.46	0.26	1565.88	1453.27	1264.09	1902.25	1909.38	419.586	622.878	688.181	348.53	300.206	306.71	1281	970.997	917.286	1385.76	1088.42	1206.63	9559.23	8546.72	7773.43	85039.2	840.131	888.127	2534.62	2013.94	2549.32	HMDB08741	PC(42:11)	M+FA-H	C50H78NO8P	43.6	0	2.9916	89.8834	-0.0740833
PC(42:6)a	10.67_906.6273m/z		906.627	10.672	3460.28	1.56	1315.82	1338.87	1174.15	1736.98	1636.09	2640.73	3841.81	3898.29	2292.45	2257.84	2329.15	3111.4	2703.02	2501.4	1212.25	1121.71	1047.72	1290.11	1448.58	1477.67	85039.2	2754.83	3331.12	763.775	769.969	843.957	HMDB08734	PC(42:6)a	M+FA-H	C50H88NO8P	39.9	0	3.40768	79.569	-0.1417
PC(42:6)b	10.97_906.6272m/z		906.627	10.9745	11810.6	4.64	2813.25	2548.65	2400.6	2798.51	2429.53	1768.33	2236.24	2291.29	265.308	177.454	173.507	1348.44	1243.75	1673.23	12061.9	13159.4	10210.7	961.923	691.329	827.822	85039.2	6025.12	5558.04	51.9167	94.179	130.091	HMDB08734	PC(42:6)b	M+FA-H	C50H88NO8P	41.5	0	3.29377	89.7333	0.1608
PC(42:7)	10.44_904.6113m/z		904.611	10.4383	68048	1.58	23619.7	20587.4	20324.2	21472.1	20996.4	6908.13	7971.88	6982.06	5332.35	6258.26	6125.33	26309.3	22502	19681.5	66000.1	76071.5	62072.5	17933.8	18131.5	18656.7	85039.2	30258.7	33510.2	16004.2	13138.3	14677.8	LMGP01012059	PC(42:7)	M+FA-H	C50H86NO8P	43.6	0	3.065	96.1706	-0.1278
PC(42:8)	9.83_902.5957m/z		902.596	9.83323	24714.8	1.83	7918.67	7406.12	7547.3	6233.21	6396.48	665.268	1472.04	1308.22	460.075	350.564	400.191	4077.79	3539.98	3183.43	27013.2	25692.8	21438.3	6843.32	6524.85	6762.72	85039.2	4799.11	5137.72	9212.48	8056.4	8927.09	HMDB08736	PC(42:8)	M+FA-H	C50H84NO8P	37.8	0	4.73735	94.5279		http://nonlinear.com/redirect/outbound?p=hmdb&param=HMDB08736
PC(O-30:0)	9.71_736.5534m/z		736.553	9.70947	6106.99	0.11	4230.15	3550.6	3533.84	3519.19	3524.62	2342.19	2763.18	2299.76	3239.78	4259.74	3426.44	5187.19	5406.71	5029.37	2682.98	2260.46	2320.37	4000.98	4204.58	4374.53	85039.2	3392.15	3543.06	5863.74	6077.27	6379.96	LMGP01020012	PC(O-30:0)	M+FA-H	C38H78NO7P	42.7	0	3.33147	91.4974	-0.114017
PC(O-32:1) PC(P-32:0)	9.89_762.5689m/z		762.569	9.88823	12832.5	1.15	6554.92	5710.25	5873.04	5588.57	5498.43	5764.01	8304.03	6350.03	12940.4	13814	11743	6278.89	5809.85	6487.61	1386.74	1431.8	1179.34	3790.83	4177.7	4544.52	85039.2	4966.25	5494.5	10278.4	11146.4	11412.8	LMGP01030074	PC(O-32:1) PC(P-32:0)	M+FA-H	C40H80NO7P	43	0	3.37139	94.6641	-0.127767
PC(O-32:3) PC(P-32:2)	9.59_786.5692m/z		786.569	9.58572	19156.9	0.69	7584.66	6542.46	6944.62	5158.81	5108.97	1005.96	468.035	357.469	1175.28	1567.43	853.342	2330.97	2255.29	2537.66	8413.93	7510.02	7087.44	3083	2923.48	2996.28	85039.2	3935.21	3993.2	16904.7	19796	20770.1	HMDB08029	PC(O-32:3) PC(P-32:2)	M+FA-H	C42H80NO7P	42.4	0	3.54238	92.5535	-0.127767
PC(O-34:1) PC(P-34:0)	10.77_790.6004m/z		790.6	10.7683	17120.8	3.05	4207.09	3653.7	3783.4	3643.87	3489.89	3390.37	4051.44	3199.04	19247.9	16103.3	16011.1	3778.83	3541.69	3887.74	2197.68	1487.18	1663.04	1272.92	1525.29	1505.72	85039.2	3150.55	3601.82	3620.91	4044.84	4339.43	LMGP01030052	PC(O-34:1) PC(P-34:0)	M+FA-H	C42H84NO7P	41.5	0	3.65302	90.9806	-0.1692
PC(O-34:2) PC(P-34:1)	10.16_788.5847m/z		788.585	10.1633	25213.9	0.84	12436.3	10668	10796.7	8851.19	8956.9	4169.08	4639.91	3773.08	28395.9	24989.1	22256.5	6049.92	5677.06	6025.83	5557.51	5070.82	4366.45	3618.74	3898.71	3980.57	85039.2	9385.79	9323.21	19901.8	25226.2	24227.7	HMDB08028	PC(O-34:2) PC(P-34:1)	M+FA-H	C42H82NO7P	42.8	0	3.16326	94.6026	-0.1416
PC(O-34:3) PC(P-34:2)	11.03_786.5690m/z		786.569	11.0295	12745.3	6.44	7983.71	5679.13	7078.93	6943.04	6293.04	2985.56	2954	1846.82	9727.45	12974.2	6901.72	5842.5	4207.96	8750.31	14631.9	12204.3	11399.6	6149.69	5500.19	7545.61	85039.2	9912.65	7183.86	4708.03	4697.8	4197.02	LMGP01030145	PC(O-34:3) PC(P-34:2)	M+FA-H	C42H80NO7P	35	0	3.33952	54.38	-0.1418
PC(O-36:2) PC(P-36:1)	10.99_816.6163m/z		816.616	10.9883	7589.18	0.32	4163.71	3585.72	3866.96	3415.92	3400.48	2593.59	2509.76	1878.33	8759.7	7210.65	6797.19	4480.19	3571.06	3645.69	2896.85	2658.44	2346.66	1730.49	1556.7	1766.62	85039.2	4072.14	4634.31	5732.84	5971.83	6643.91	LMGP01030081	PC(O-36:2) PC(P-36:1)	M+FA-H	C44H86NO7P	38.7	0	4.46394	85.942	-0.3205
PC(O-36:3) PC(P-36:2)a	10.47_814.6007m/z		814.601	10.4658	3457.48	1.14	2616.84	2265.45	2350.16	2150.67	2116.28	1825.69	2239.2	1497.02	3079.13	3050.59	2382.15	3310.77	2606.53	3277.64	3068.64	2386.76	2131.88	1109.48	1078.07	1473.73	85039.2	3054.53	3535.06	2965.31	3177.73	3123.31	LMGP01020204	PC(O-36:3) PC(P-36:2)a	M+FA-H	C44H84NO7P	38.4	0	3.39952	80.2441	-0.2379
PC(O-36:3) PC(P-36:2)b	11.99_814.6005m/z		814.601	11.9921	6906.04	3.47	2515.34	3494.62	3487.34	3068.47	3222.99	2306.5	1359.08	1470.45	5186.99	4600.97	4949.04	3737.36	4444.77	4962.84	9028.83	5894.45	5794.84	2964.27	2570.8	2343.45	85039.2	4586.61	3265.13	1395.76	1729.57	2485.41	LMGP01030111	PC(O-36:3) PC(P-36:2)b	M+FA-H	C44H84NO7P	46.9	0	2.89086	88.9015	0.0506
PC(O-36:4) PC(P-36:3)a	10.14_812.5848m/z		812.585	10.1358	113963	0.68	32484.1	29875.4	30648	30908.7	31205.9	77766.9	104773	96319	126944	111135	103810	43778.8	47313.5	46020.4	8965.16	7346.41	7090.61	7624.31	6574.25	7149.99	85039.2	34094.1	33694.9	12094.9	11561.9	11942.7	LMGP01020206	PC(O-36:4) PC(P-36:3)a	M+FA-H	C44H82NO7P	37.7	0	4.84049	94.1721		http://nonlinear.com/redirect/outbound?p=lipidmaps&param=LMGP01020206
PC(O-36:4) PC(P-36:3)b	10.78_840.6158m/z		840.616	10.782	21881.7	1.75	5973.5	5721.62	5702.66	5715.43	5858.6	17261.1	24981	23403	20645	17152.8	14834	6751.69	7076.36	6907.58	2048.27	1407.47	1344.28	1022.67	821.636	981.833	85039.2	5993.13	5748.36	2034	2159.7	2353.42	HMDB08359	PC(O-36:4) PC(P-36:3)b	M+FA-H	C46H86NO7P	39.5	0	4.61452	92.5771	-0.4089
PC(O-36:4) PC(P-36:3)c	11.33_812.5849m/z		812.585	11.332	10884.5	1.49	5028.9	5025.43	5856.36	5483.97	5369.26	3510.68	2487.21	2890.28	9510.37	9287.64	8625.22	7002.36	8406.55	9752.78	5670.7	4096.1	4385.95	5184.18	4770.05	5709.97	85039.2	12514.4	8944.05	3829.86	4369.84	4685.31	LMGP01020206	PC(O-36:4) PC(P-36:3)c	M+FA-H	C44H82NO7P	46.6	0	3.47309	89.4767	0.0507
PC(O-36:5) PC(P-36:4)	11.98_810.5669m/z		810.567	11.9783	5689.8	3.91	1748	1785.83	1579.03	2416.28	2286.25	2719.5	1350.48	1329.28	855.238	973.168	1172.34	4280.44	4969.6	4098.02	3124.17	2017.53	2084.89	1397.48	1258.04	1089.18	85039.2	6261.04	5531.12	484.686	484.687	529.934	LMGP01090032	PC(O-36:5) PC(P-36:4)	M+FA-H	C44H80NO7P	36.3	0	1.90623	83.9259		http://nonlinear.com/redirect/outbound?p=lipidmaps&param=LMGP01090032
PC(O-36:6) PC(P-36:5)	11.59_808.5512m/z		808.551	11.5933	9359.54	0.12	4984.84	5541.55	5085.11	5293.39	5284.54	4669.89	3825.42	4473.34	8778.47	8534.21	8218.36	7224.8	8194.9	6301.22	7189.52	4502.01	5538.8	4769.94	4401.62	3746.42	85039.2	10362.9	9074.86	3373	3414.87	3775.22	HMDB08260	PC(O-36:6) PC(P-36:5)	M+FA-H	C44H78NO7P	55.7	0	2.18062	89.6631	-0.0044
PC(O-38:2) PC(P-38:1)	11.80_844.6474m/z		844.647	11.7996	10745.5	1.47	6752.69	6082.88	5859.16	5345.01	5216.56	4423.01	5813.14	4828.94	10693.1	9632.65	9677.42	5144.41	4516.25	4482.01	4662.99	4628.7	4532.22	2923.07	3442.38	3478.53	85039.2	5316.1	6159.72	9749.82	11363.5	11123.3	LMGP01020228	PC(O-38:2) PC(P-38:1)	M+FA-H	C46H90NO7P	41	0	4.54405	92.5694	-0.2275
PC(O-38:4) PC(P-38:3)a	10.99_840.6158m/z		840.616	10.9883	44690.6	2.26	8913.35	8347.41	8475.96	8836.41	9156.43	39832.5	51243	42996.2	27578.4	23894.1	22699.5	8449.4	8402.82	8103.06	1649.54	1530.99	1705.43	465.642	426.944	486.948	85039.2	8209.29	8185.35	299.708	398.018	386.019	HMDB08359	PC(O-38:4) PC(P-38:3)a	M+FA-H	C46H86NO7P	41.4	0	4.6174	93.9512	-0.2026
PC(O-38:4) PC(P-38:3)b	12.09_840.6161m/z		840.616	12.0883	5878.54	2.8	2541.62	3488.15	3252.69	3246.93	2824.06	2419.13	1572.73	1703.48	5450.43	5166.6	5235.12	3448.81	4094.96	4752.51	7504.78	4793.98	5336.86	2113.37	1950.99	2138.3	85039.2	5499.18	3794.19	1383.46	1525.05	1703.39	LMGP01030088	PC(O-38:4) PC(P-38:3)b	M+FA-H	C46H86NO7P	47	0	3.07195	89.0688	0.0505
PC(O-38:5) PC(P-38:4)a	10.23_838.6003m/z		838.6	10.232	53351	2.23	31091.1	27607.7	26748.1	25554.1	24761.8	32677.7	46565.3	40650.3	58653.7	51070.5	50328.7	33555.1	34211.1	29651.3	5333.16	3373.08	2975.86	20383.6	19457.7	19437.2	85039.2	19974.6	21189.3	45046.2	47559.3	51710.5	LMGP01030090	PC(O-38:5) PC(P-38:4)a	M+FA-H	C46H84NO7P	38.3	0	4.499	96.6999		http://nonlinear.com/redirect/outbound?p=lipidmaps&param=LMGP01030090
PC(O-38:5) PC(P-38:4)b	10.45_838.6003m/z		838.6	10.452	49047.7	0.41	24575	22430.7	23741.7	21881.2	23328	30537.1	39536.9	34734.3	54084.5	47355	45703.5	29367.4	29151.5	29347.4	21630.5	19274.2	18746.4	21459.9	20023.2	20133.9	85039.2	29988.7	29331.3	21514.6	19114.5	20912.9	LMGP01030090	PC(O-38:5) PC(P-38:4)b	M+FA-H	C46H84NO7P	37.9	0	4.47624	94.737		http://nonlinear.com/redirect/outbound?p=lipidmaps&param=LMGP01030090
PC(O-38:5) PC(P-38:4)c	12.21_836.5823m/z		836.582	12.2121	8924.12	2.11	5062.84	5786	5354.83	5293.47	5453.83	4425.16	3289.15	3213.27	6602.78	5426.32	6390.57	6890.24	8624.46	6698.3	10254.5	7764.18	7616.39	5536.15	5594.61	4638.72	85039.2	9739.29	8610.89	3363.43	3720.22	4090.78	HMDB11320	PC(O-38:5) PC(P-38:4)c	M+FA-H	C46H82NO7P	55.3	0	2.88059	88.1149	-0.0045
PC(O-38:6) PC(P-38:5)	9.98_836.5846m/z		836.585	9.98448	454789	1.73	225032	194725	198013	170215	174430	127979	109984	113322	107761	108460	102848	241750	233388	203760	112855	90853.4	90524.6	195671	190147	178796	85039.2	149483	147400	438735	464541	461093	LMGP01020064	PC(O-38:6) PC(P-38:5)	M+FA-H	C46H82NO7P	37.3	0	4.39321	91.7106		http://nonlinear.com/redirect/outbound?p=lipidmaps&param=LMGP01020064
PC(O-38:7) PC(P-38:6)	9.26_834.5695m/z		834.569	9.25568	36183.6	0.22	12640.3	11491.2	11374.8	13922.2	13966.2	5428.51	3311.3	3037.03	4291.98	4760.56	4845.15	36434.1	39033.5	33083.1	4267.52	3950.75	2759.77	22449.9	22170.4	21846.8	85039.2	27386	27455.8	13193.9	12454.6	14094.5	LMGP01030015	PC(O-38:7) PC(P-38:6)	M+FA-H	C46H80NO7P	43	0	3.33256	93.6072	-0.114
PC(O-40:5) PC(P-40:4)a	11.08_866.6319m/z		866.632	11.0845	24968.8	0.24	6686.42	6136.51	5749.89	6745.19	6768.49	22098.6	29264.4	23543.4	14241.9	12171.5	11307.3	9617.67	9272.72	8557.18	1465.76	1533.75	1174.67	2238.88	2185.68	2305.84	85039.2	10497	9638.42	1814.91	1425.13	1702.55	LMGP01020107	PC(O-40:5) PC(P-40:4)a	M+FA-H	C48H88NO7P	37.6	0	4.70562	93.4736		http://nonlinear.com/redirect/outbound?p=lipidmaps&param=LMGP01020107
PC(O-40:5) PC(P-40:4)b	11.37_866.6318m/z		866.632	11.3733	4656.97	3.1	1602.58	1704.15	1642.49	1557.9	1740.17	3971.61	5384.9	4614.41	196.648	597.701	294.129	1031.83	1185.9	1461.65	4104.19	4694.91	4082.57	25.9232	71.6377	70.174	85039.2	3680.81	3531.67	0	0	31.6629	HMDB11259	PC(O-40:5) PC(P-40:4)b	M+FA-H	C48H88NO7P	42.6	0	4.91506	83.8891	0.0869
PC(O-40:6) PC(P-40:5)	10.85_864.6163m/z		864.616	10.8508	23613.2	1.45	15514	14468.3	14169.3	14018.4	14797.6	13635.1	14016.5	13013.7	8519.32	8954.41	8144.04	25639.1	23523	21677.5	21777.4	24458.7	23105.1	16181.9	16197.5	15731.7	85039.2	19350.1	19809	13629.7	12390.6	12234.3	LMGP01020110	PC(O-40:6) PC(P-40:5)	M+FA-H	C48H86NO7P	42.4	0	3.02668	92.9804	-0.1555
PC(O-40:6) PC(P-40:7)	10.56_864.6162m/z		864.616	10.562	17222.7	0.83	11147.2	9922.21	9958.16	11164	11033.1	14824.3	20010.3	16015.7	16295.1	15369.3	13666.2	18052.6	17601.5	16013.9	8155.5	5318.79	3821.35	11859	11554.6	11103	85039.2	15659.3	16385.5	9241.61	8560.24	9154.13	LMGP01020110	PC(O-40:6) PC(P-40:7)	M+FA-H	C48H86NO7P	39.5	0	2.93072	91.9435	-0.4443
PC(O-40:7) PC(P-40:6)a	10.11_862.6004m/z		862.6	10.1082	18437.7	2.03	11188.1	9860.86	9757.82	11006.2	10695.2	5931.7	6396.95	4922.29	2970.96	3275.5	2746.9	20252.8	18702.1	16358.3	26357.7	12192.3	7946.87	13253	12625	12605.8	85039.2	18653.3	19457.4	8213.78	7408.76	8115.32	LMGP01030014	PC(O-40:7) PC(P-40:6)a	M+FA-H	C48H84NO7P	42.6	0	3.20753	93.9305	-0.1416
PC(O-40:7) PC(P-40:6)b	10.41_862.6004m/z		862.6	10.4108	16892	1.92	6092.11	5904.77	6157.64	6522.59	6701.87	2063.28	1905.82	1306.81	2217.98	2326.64	2423.73	17307.7	17695.8	15672.7	1647.63	1486.81	1281.79	11328.1	11471.3	10955	85039.2	9558.13	9992.17	8521.62	8651.39	9175.52	LMGP01030014	PC(O-40:7) PC(P-40:6)b	M+FA-H	C48H84NO7P	40.6	0	3.13293	86.0638	0.161
PC(O-40:7) PC(P-40:6)	10.74_862.6007m/z		862.601	10.7408	6597.23	3.86	1192.01	1182.73	1110.16	1725.43	1546.48	541.321	345.983	204.657	298.174	196.137	306.314	7494.24	7032.39	5265.05	1282.57	1384.03	2251.18	595.509	424.388	550.567	85039.2	3212.35	3506.54	696.399	395.885	598.457	LMGP01030014	PC(O-40:7) PC(P-40:6)	M+FA-H	C48H84NO7P	41.7	0	3.2989	86.5192	-0.1279
PC(O-40:8) PC(P-40:7)	9.53_860.5847m/z		860.585	9.53072	6371.52	1.62	1456.71	1434.12	1201.51	1846.38	1889.04	346.679	121.477	67.7485	27.8032	212.387	329.688	6255.76	7513.09	5345.72	1351.72	1546.73	583.874	2176.84	1969.34	2138.56	85039.2	3798.87	3408.3	1427.75	1547.54	1992.97	HMDB08754	PC(O-40:8) PC(P-40:7)	M+FA-H	C48H82NO7P	40.8	0	4.28911	80.9921	-0.1003
PC(O-42:7) PC(P-42:6)	10.95_890.6322m/z		890.632	10.947	12012.8	1.59	6105.99	5516.14	5350.91	5720.62	5851.03	3687.6	3870.64	2501.78	1501.13	1411.54	1352.19	10818.5	10456.3	8908.72	9129.03	10459.3	7078.22	5403.72	6194.68	5620.94	85039.2	12035.2	12223.3	4396.5	3794.5	3793.34	LMGP01030104	PC(O-42:7) PC(P-42:6)	M+FA-H	C50H88NO7P	42.2	0	3.0477	92.2336	-0.1555
PE(40:4)	11.36_794.5742m/z		794.574	11.3595	20025.8	0.07	13605.4	7944.4	10907.2	12314.3	12326.3	7861.63	12595.5	14857.4	14798.5	16486.2	11370.3	21271.8	15587	23218.5	8612.45	11878.4	9796.24	11919.2	16243.2	17445	85039.2	16939.6	20249.2	10173.3	9396.19	6013.49	HMDB09585	PE(40:4)	M-H	C45H82NO8P	39.9	0	2.72154	92.4323	0.3808
PE(32:1)	9.34_716.5269m/z		716.527	9.33818	5304.47	2.19	2808.49	1902.08	2077.82	2225.98	2078.29	4262.88	4501.58	5962.43	5382.38	5405.39	5125.63	1358.63	1416.68	1372.34	2212.85	2446.96	2219.38	2494.78	2686.79	2450.37	85039.2	1420.08	1730.69	1314.71	1371.47	1538.11	HMDB08926	PE(32:1)	M-H	C39H76NO8P	36.7	0	4.69184	89.1583		http://nonlinear.com/redirect/outbound?p=hmdb&param=HMDB08926
PE(36:1)	10.20_744.5585m/z		744.558	10.2045	7707.1	2.01	2465.29	1888.08	1801.79	2047.84	1866.23	2053.69	1981.28	1901.75	7689.49	7885.09	7546.71	1130.4	1194.29	1562.78	2972.34	3091.44	3055.37	471.994	592.868	593.027	85039.2	1813.65	1938.53	733.983	833.552	951.952	LMGP02010036	PE(36:1)	M-H	C41H80NO8P	41.5	0	2.50508	85.7319	-0.1279
PE(36:2)a	9.60_742.5428m/z		742.543	9.59947	4446.91	2.63	2254.8	1792.84	1724.9	1848.8	1728.23	1624.42	1422.54	1522.79	4558.87	4456.06	4325.79	516.542	611.407	906.046	4266.56	4850.95	3699.97	736.21	1001.4	760.809	85039.2	2052.78	2177.15	1197.96	1609.55	1582	LMGP02010044	PE(36:2)a	M-H	C41H78NO8P	41.8	0	3.14188	84.4126	-0.100283
PE(36:2)b	10.73_742.5429m/z		742.543	10.727	5772.9	0.28	3404.57	2793.38	3226.92	3565.9	3580.12	1760.93	2248.42	2073.19	4112.37	4871.73	3574.53	3679.7	2802.96	4533.15	5506.1	5954.3	5803.09	2379.53	2697.5	2859.77	85039.2	5332.31	5652.75	2781.4	3343.9	2719.51	LMGP02010510	PE(36:2)b	M-H	C41H78NO8P	42.2	0	4.38785	83.9627	0.0916
PE(36:4)a	8.66_738.5111m/z		738.511	8.66442	8953.31	0.48	2956.69	2433.11	2452.11	1904.1	2015.94	1908.25	1792.94	1817.46	296.645	230.392	187.281	501.115	497.28	496.787	9187.04	9814.89	7858.02	1986.11	2044.5	1768.78	85039.2	725.128	476.647	3560.4	3133.9	3745	HMDB09189	PE(36:4)a	M-H	C41H74NO8P	42	0	2.75434	84.2886	-0.0879167
PE(36:4)b	9.72_738.5115m/z		738.512	9.72323	14848.9	2.58	4828.02	4612.92	4869.42	4314.94	4553.17	10568.8	16895.9	17082.1	12336	13653.1	13230.3	2372.34	2421.49	2594.08	5166.12	5531.15	6350.62	2270.06	2236.97	2351.7	85039.2	3121.39	2495.78	2074.48	2368.26	2421.75	LMGP02011203	PE(36:4)b	M-H	C41H74NO8P	56.3	0	1.52793	92.4519	-0.00398333
PE(36:5)	9.19_736.4966m/z		736.497	9.18693	22707.7	0.26	11746.2	10261.7	10960	10655.1	10694.9	5422.64	8514.52	8159.86	19837.3	21987.7	22580.7	6062.71	6554.44	6695.18	6470.44	6300.55	7574.63	23454.4	22615.1	22053.6	85039.2	5831.18	5405.23	18122.2	18431.9	20585.1	LMGP02011217	PE(36:5)	M-H	C41H72NO8P	55.4	0	3.80312	91.7044	-0.00428333
PE(37:5)	9.61_750.5114m/z		750.511	9.61322	5171.37	5.33	2126.6	1967.4	2198.45	2556.42	2807.56	3680.08	5387.37	6446.66	3453.32	4212.65	4049.91	2286.92	1686.54	2287.88	1801.69	1405.2	1514.16	4861.54	4405.97	4480.49	85039.2	2722.48	2564.82	2204.32	2280.05	2858.21	HMDB09615	PE(37:5)	M-H	C42H74NO8P	50	0	2.67135	84.5467	-0.0178
PE(37:6)	9.34_748.4956m/z		748.496	9.33818	3437.3	2.51	1573.24	1148.69	1358.98	1656.8	1716.71	1389.28	1743.37	2187.75	3759.74	4006.81	2545.35	2272.31	1362.77	2339.66	5103.39	2741.23	2447.91	1526.06	2272.92	2477.3	85039.2	1696.14	2078.97	557.476	709.867	560.086	LMGP02011136	PE(37:6)	M-H	C42H72NO8P	38.9	0	3.54287	79.7626	0.16065
PE(38:2)a	11.63_770.5742m/z		770.574	11.6346	8997.53	1.8	5068.28	3258.91	3895.21	4898.29	4774.95	2579.69	2950.62	3635.89	2937.58	3579.7	2738.47	7436.22	6407.26	8666.38	6676.19	8713.68	7846.09	2539.98	2975.66	3390.81	85039.2	8248.63	9281.99	2234.19	2124.94	1860.53	LMGP02010124	PE(38:2)a	M-H	C43H82NO8P	47.8	0	4.25359	93.6384	0.0471
PE(38:2)b	11.77_770.5740m/z		770.574	11.7721	8214.5	5.51	3946.18	2505.9	3386.91	3752.24	4056.34	3306.08	4480.11	5734.47	2912.82	3502.67	2576.31	8551.45	5830.82	10261.2	2984.65	4254.37	3215.77	3651.81	4727.6	5014.52	85039.2	5230.87	6669.96	1957.03	1834.87	1171.08	LMGP02010124	PE(38:2)b	M-H	C43H82NO8P	41.5	0	3.99501	91.8985	0.1846
PE(38:3)	11.28_768.5584m/z		768.558	11.277	65415.8	3.42	38219.3	23592.7	30995.5	33087.6	34725.9	31394.1	45129.3	56678.5	69787.2	77261.3	49198.8	53121.8	37952.4	57903	27190.2	36860.5	37859.7	26884.3	34645.2	36956.3	85039.2	40443.5	44843.8	25802.1	22933.8	15490.5	HMDB09163	PE(38:3)	M-H	C43H80NO8P	40.2	0	2.3982	93.9232	0.3945
PE(38:5)a	9.05_764.5271m/z		764.527	9.04943	38354.4	1.3	18043.8	14190.5	14218.5	15318.6	15039.8	20880.7	22729.7	23297.9	38886.4	38803.6	37373.2	9856.86	9434.72	8836.16	8699.94	8095.93	8018	30972.2	29159.5	30778.9	85039.2	8090.71	8551.83	18351.2	16290.1	18886.3	HMDB09453	PE(38:5)a	M-H	C43H76NO8P	43.7	0	3.39281	92.4344	-0.0871167
PE(38:5)b	10.05_764.5265m/z		764.527	10.0532	45721.1	0.84	28446.2	24806.2	25891.8	26901.7	26583.2	24093.6	43711.9	42155.7	42631	48830.2	45702	22725.5	21404.1	20214	15729.9	17339.9	19177.6	45225.4	43465.3	41508.6	85039.2	18922.3	18019.5	36684.6	38521.5	43412.2	HMDB09649	PE(38:5)b	M-H	C43H76NO8P	51.9	0	2.85821	93.2806	-0.0178
PE(38:5)c	10.30_764.5270m/z		764.527	10.3008	71997	1.99	12415.4	8072.95	10705.3	13342.5	13799.4	45709.4	73751.2	96530.3	43062.1	46411.4	32418.3	11853.5	9499.56	14904	3189.3	3597.01	3566.47	3004.58	3349.89	3419.17	85039.2	9113.86	9107.67	1503.22	1364.8	1223.17	HMDB09649	PE(38:5)c	M-H	C43H76NO8P	41.2	0	4.82474	94.7944	0.205
PE(38:6)a	8.60_762.5115m/z		762.511	8.59565	7205.28	2.14	1836.76	1275.03	1140.02	1532.57	1399.83	554.844	203.221	354.842	0	120.239	0	680.458	422.52	525.677	8003.39	7306.23	6306.21	2481.06	2547.65	2588.97	85039.2	878.355	848.714	994.635	1041.95	1063.29	LMGP02010095	PE(38:6)a	M-H	C43H74NO8P	39.8	0	3.03756	84.7976	0.159667
PE(38:6)b	9.32_762.5115m/z		762.512	9.32443	8156.38	1.43	3267.21	3060.29	3441.27	3885.78	3808.24	1743.9	3528.01	3365.28	5748.36	6624.21	7290.07	2593.47	2372.54	2424.16	2604.55	2670.53	3575.03	8372.53	7990.35	8106.25	85039.2	3473.44	3602.92	4660.94	5120.41	5520.36	HMDB09682	PE(38:6)b	M-H	C43H74NO8P	55	0	3.00353	87.8239	-0.00398333
PE(38:6)c	9.60_762.5113m/z		762.511	9.59947	23889.9	1.1	12709.6	10009.3	11175.7	12048.2	11570	5285.54	9514.21	9470.46	6027.62	7836.99	5682.6	7316.33	6375.83	7569.3	21431.2	19059.3	21372.3	23761.8	24192.6	23715.3	85039.2	7951.6	7449.78	15641.7	18581.5	20152.7	HMDB09682	PE(38:6)c	M-H	C43H74NO8P	40.2	0	2.79051	91.9394	0.27105
PE(38:6)d	9.76_762.5114m/z		762.511	9.76448	40642.7	3.12	18289.1	11885.2	16261.7	15544	16245.6	14076.3	21875.3	26643.9	43879.8	44960	33088.3	20996.1	16248.3	23442.5	5740.28	7819.9	7486.34	23002.1	26962.9	28761.8	85039.2	10830	13096.3	18642.2	15218.3	11677.1	HMDB09682	PE(38:6)d	M-H	C43H74NO8P	38.7	0	2.79912	89.0098	0.436067
PE(39:3)	11.21_782.5741m/z		782.574	11.2083	3172.66	2.18	1812.68	1293.35	1398.51	1586.97	1636.77	1548.93	1418.3	1281.05	2342.95	2491.98	1979.21	3816.98	2389.3	3311.69	1944.21	2577.96	1792.42	795.451	915.555	1431.2	85039.2	1929.21	2839.37	1555.77	1600	1145.39	LMGP02011002	PE(39:3)	M-H	C44H82NO8P	46.6	0	3.01245	86.0901	-0.0455
PE(40:3)	11.88_796.5899m/z		796.59	11.8821	24135.6	4.85	17918.8	11081.2	15452.9	15707.6	16822.3	15531.9	24605.6	30434.4	20742.7	22999.6	17287.3	24965.4	18495.6	28945.7	12064.6	17111.3	16275.9	16044.6	22560.1	23851.5	85039.2	17757.8	21430.8	14090.2	12605.4	7491.22	HMDB09361	PE(40:3)	M-H	C45H84NO8P	42	0	2.80056	95.2512	0.2157
PE(40:5)a	10.70_792.5588m/z		792.559	10.6995	6891.07	1.42	3267.6	2578.38	2801.38	3270.76	3205.88	4697.68	8244.59	7730.92	6201.24	6671.66	6628.3	3202.97	2672.39	3178.5	2634.61	2461.13	2344.22	3376.04	3750.05	4105.41	85039.2	3651.07	3799.19	1644.25	1946.75	1970.22	LMGP02010836	PE(40:5)a	M-H	C45H80NO8P	37.4	0	4.94146	92.8951		http://nonlinear.com/redirect/outbound?p=lipidmaps&param=LMGP02010836
PE(40:5)b	10.93_792.5585m/z		792.558	10.9333	24587.3	0.97	5062.25	3637.02	4516.61	5156.8	5228.18	12068	28109.2	33584.7	5522.04	6211.39	4246.1	3454.06	2867.34	4016.92	7777.1	8482.06	8362.12	2298.08	2374.35	2372.71	85039.2	5323.67	5078.45	900.607	928.422	820.849	LMGP02010836	PE(40:5)b	M-H	C45H80NO8P	37.3	0	4.54851	91.6532		http://nonlinear.com/redirect/outbound?p=lipidmaps&param=LMGP02010836
PE(40:6)a	9.17_790.5430m/z		790.543	9.17318	6954.92	1.45	3469.81	2778.61	2864.03	3153.39	3273.7	4346	5013.64	4768.6	7135.92	6938.69	6790.15	3255.11	2475.98	2729.89	2414.03	2461.57	2393.1	5112.54	4955.82	4799.66	85039.2	3098.19	4107.44	2765.42	2716.98	2899.82	LMGP02010864	PE(40:6)a	M-H	C45H78NO8P	41.6	0	2.97173	84.1869	-0.100217
PE(40:6)b	9.46_790.5429m/z		790.543	9.46195	37923.4	2.88	20843.4	16050.9	15818.1	17024.5	16061.1	9114.77	8372.93	8347.54	5858.01	6721.81	6173.88	14817.5	14774.8	13334.8	39450.1	38756.2	35564	24130.9	23894.9	25230.7	85039.2	14910.2	14407.5	20214.7	20418.3	22161.7	LMGP02010864	PE(40:6)b	M-H	C45H78NO8P	41.7	0	2.79063	95.053	0.18855
PE(40:6)c	10.44_790.5428m/z		790.543	10.4383	75389.1	0.2	41335.7	33555.8	37533.1	39127.4	39236.7	28263.6	47541.9	52301.2	19737	23787.1	20937.6	37885.8	33323.9	36131.8	39989.2	45655.3	44938.5	78956.4	76359.7	70851.2	85039.2	35983.9	36581.2	51340.5	53505.9	57045.7	HMDB09684	PE(40:6)c	M-H	C45H78NO8P	49.6	0	3.18106	94.0196	-0.0316
PE(40:7)	9.72_788.5270m/z		788.527	9.72323	6517.51	0.65	3393.66	2853.78	2833.84	3365.03	3396.33	775.089	1540.82	1135.01	539.966	1100.02	996.841	2577.78	2113.68	2250.9	6967.28	5649.12	6936.13	6347.89	6495.44	6177.94	85039.2	3620.07	3658.18	3657.22	3974.24	4118.92	HMDB09686	PE(40:7)	M-H	C45H76NO8P	50.3	0	2.39669	85.1714	-0.0177333
PE(O-36:2) PE(P-36:1)	11.62_728.5635m/z		728.564	11.6208	30078.3	1.08	17518.8	18394.1	17731.5	17883.4	17612.3	13987.6	10557	9585.1	28293.5	27463.2	27404	27516.9	31236.4	25685.2	20745.7	15528.5	18125.8	11330.1	10780.3	9812.93	85039.2	31394.5	30308.6	16643.4	19809.5	20458.2	HMDB11439	PE(O-36:2) PE(P-36:1)	M-H	C41H80NO7P	56.5	0	2.80189	94.3143	-0.0044
PE(O-36:3) PE(P-36:2)	11.19_726.5478m/z		726.548	11.1945	59568	0.07	33294.7	34304.3	32010	28641.7	28613.7	18839.6	17496.6	15357.6	43045.9	45026	41150.9	30183.6	34120.4	26039.5	31577.1	23375	26423.4	23758	22255	20058.3	85039.2	34433.4	31004.5	52028.7	60142.5	66533	HMDB09115	PE(O-36:3) PE(P-36:2)	M-H	C41H78NO7P	37.8	0	4.81666	94.5416		http://nonlinear.com/redirect/outbound?p=hmdb&param=HMDB09115
PE(O-36:4) PE(P-36:3)	10.52_724.5321m/z		724.532	10.5208	20670.2	0.31	9167.87	9349.83	8523.98	7317.66	7349.38	3764.65	3156.27	2380.95	4033.57	4476.36	4324.73	5650.73	5647.03	4813.11	20964.9	18251.3	22794.3	5810.18	6256.4	5159.39	85039.2	5650.2	4830.88	11864.2	13770.1	15732.9	LMGP02030048	PE(O-36:4) PE(P-36:3)	M-H	C41H76NO7P	55.9	0	2.48429	91.3964	-0.0041
PE(O-36:5) PE(P-36:4)	11.03_750.5477m/z		750.548	11.0295	424089	1.48	110719	122506	113337	102275	104439	447874	415748	408645	307485	273253	304120	96909	116316	96322.4	37654.3	32894.4	40468.4	36749.1	30948.1	26754.7	85039.2	86126.7	69067.4	25237	24856.2	28422.7	LMGP02030078	PE(O-36:5) PE(P-36:4)	M-H	C43H78NO7P	53.1	0	2.73744	97.1913	-0.018
PE(O-36:6) PE(P-36:5)	9.64_720.5007m/z		720.501	9.64072	21201.2	3.42	7325.73	8135.69	7562.61	6071.67	5785.22	1772.17	1804.89	1327.69	11668.8	10075.8	10375.2	4785.9	5235.35	4548.43	1823.12	1063.01	872.621	6773.08	5717.97	5594.05	85039.2	3091.13	3064.12	18362.4	20468.2	24773	HMDB09477	PE(O-36:6) PE(P-36:5)	M-H	C41H72NO7P	56	0	2.8908	92.8267	-0.00405
PE(O-37:2) PE(P-37:1)	11.99_742.5794m/z		742.579	11.9921	48500.6	1.13	17197.1	18721.2	16893.6	20474.3	20148.8	25210.6	13304.2	14684.4	12816.4	12687.9	14295.4	37533.9	41710.5	35306.9	29350.7	19175.6	19562.9	13755.4	13213.3	11713.5	85039.2	52151.2	47503.8	6900.82	7506.41	8480.22	LMGP02030071	PE(O-37:2) PE(P-37:1)	M-H	C42H82NO7P	56.6	0	2.76652	94.4199	-0.0044
PE(O-38:2) PE(P-38:1)	12.49_756.5946m/z		756.595	12.4871	145166	1.1	82534	87701.7	80755.9	83990.2	85311.4	65578.6	57948.7	53619.6	61858	56471.2	68721.3	133982	167015	134501	136324	133691	132783	69655.9	65303.9	59178.5	85039.2	142426	131919	60324.5	65802.1	68450	HMDB11446	PE(O-38:2) PE(P-38:1)	M-H	C43H84NO7P	55.5	0	2.89307	96.2123	0.0092
PE(O-38:3) PE(P-38:2)	11.99_754.5789m/z		754.579	11.9921	475674	0.18	321571	334454	312442	294942	295711	275593	257597	252897	489331	451968	485724	398107	449617	361127	396699	353020	393371	291474	268900	224150	85039.2	354604	315491	330515	361302	394778	HMDB11357	PE(O-38:3) PE(P-38:2)	M-H	C43H82NO7P	57.4	0	2.85037	98.4151	-0.0044
PE(O-38:4) PE(P-38:3)a	10.14_752.5632m/z		752.563	10.1358	5616.7	2.58	1565.63	1302.54	1265.19	1369.13	1320.02	3811.76	4611.69	4869.56	6016.16	5811.07	5022.88	1542.05	2281.27	2070.02	138.533	96.2715	35.8763	69.2642	89.5847	157.512	85039.2	1233.01	1241.06	289.413	357.856	398.766	LMGP02030077	PE(O-38:4) PE(P-38:3)a	M-H	C43H80NO7P	36	0	4.24577	84.9332		http://nonlinear.com/redirect/outbound?p=lipidmaps&param=LMGP02030077
PE(O-38:4) PE(P-38:3)b	11.43_752.5633m/z		752.563	11.4283	67853.3	2.01	49083.8	52504.1	49831.4	46043.9	47374.6	44604.2	47941.2	40561.3	58016.1	55418.4	57763.9	60370.1	70689.5	55259.2	39578.1	31169.4	31271	64819.2	58664.4	50389.5	85039.2	61388	56668.4	61026.4	66502.2	76031.4	LMGP02030077	PE(O-38:4) PE(P-38:3)b	M-H	C43H80NO7P	38	0	4.45318	95.0158		http://nonlinear.com/redirect/outbound?p=lipidmaps&param=LMGP02030077
PE(O-38:5) PE(P-36:4)	10.18_722.5164m/z		722.516	10.177	11443.2	1.54	3454.94	3937.01	3619.43	3318.61	3391.47	6672.99	7997.02	6545.05	12767.5	10693.5	10868.7	3508.85	4109.5	3665.25	2872.76	2391.99	3062.63	1215	1142.43	1017.37	85039.2	3474.98	2776.44	1977.94	2454.37	3073.87	LMGP02030049	PE(O-38:5) PE(P-36:4)	M-H	C41H74NO7P	55.5	0	2.76101	89.7419	-0.0041
PE(O-38:6) PE(P-38:5)a	9.12_748.5321m/z		748.532	9.11818	3366.67	0.76	1532.54	1136.66	1022.49	1348.89	1334.52	309.719	111.24	40.6228	159.722	226.944	231.877	3576.12	3424.03	3099.84	130.602	203.577	96.241	3428.86	3011.24	2993.67	85039.2	1429.46	1604.02	1377.24	1530.07	1537.37	HMDB09478	PE(O-38:6) PE(P-38:5)a	M-H	C43H76NO7P	35.9	0	4.52871	84.7447		http://nonlinear.com/redirect/outbound?p=hmdb&param=HMDB09478
PE(O-38:6) PE(P-38:5)b	10.49_748.5319m/z		748.532	10.4933	348754	1.39	194573	203752	192544	168334	171664	177036	177416	168264	365898	316823	363541	192222	213592	171405	78825.6	82582.4	97341.1	269980	238940	207723	85039.2	122991	111746	279703	293681	349913	HMDB11359	PE(O-38:6) PE(P-38:5)b	M-H	C43H76NO7P	47.7	0	4.62837	96.5487	-0.0479
PE(O-38:7) PE(P-38:6)	10.03_746.5166m/z		746.517	10.0257	21460.7	3.69	8015.55	8895.68	8436.62	6731.37	7092.49	1772.98	2020.58	1809.14	3194.5	3470.91	4079.54	6215.8	6114.74	5672.24	7504.26	5530.88	5623.59	10668.7	9005.53	8549.23	85039.2	5327.84	5169.16	17895.7	21693.7	24792.6	HMDB09708	PE(O-38:7) PE(P-38:6)	M-H	C43H74NO7P	37.4	0	4.81551	92.3373		http://nonlinear.com/redirect/outbound?p=hmdb&param=HMDB09708
PE(O-39:2) PE(P-39:1)a	11.30_714.5477m/z		714.548	11.3045	9028.29	2.09	2838.1	3161.09	3149.49	3794.2	3683.87	3018.79	1857.14	1501.65	4966.99	5230.69	4992.37	9265.17	10112.4	7707.28	3441.18	2422.64	3140.56	2429.28	2562.66	2321.83	85039.2	8933.02	7719.75	1183.42	1372.09	1613.29	LMGP02030023	PE(O-39:2) PE(P-39:1)a	M-H	C40H78NO7P	51.5	0	2.5216	88.4585	-0.0181
PE(O-39:2) PE(P-39:1)b	12.73_770.6103m/z		770.61	12.7346	16039.6	1.36	6677.68	7448.84	6382.58	7058.54	6923.79	3788.43	2374.46	2538.84	4686.68	4373.47	5080.6	10068.7	11969.8	10751.4	19743.9	14930.9	13443.9	6702.36	6006.32	5613.6	85039.2	11877.8	10803.2	3031.81	3463.62	3913.76	LMGP02030080	PE(O-39:2) PE(P-39:1)b	M-H	C44H86NO7P	54.8	0	2.93317	92.5018	0.0091
PE(O-39:4) PE(P-39:3)	11.66_766.5790m/z		766.579	11.6621	18535.6	0.36	11571.6	12595.2	11424.6	12311.8	12374.3	5171.26	4461.43	4051.07	15129.3	14307.9	15316.1	18008.8	20139.8	16870	16047.1	10866	11734.8	16740.1	16332.8	13539.1	85039.2	20225.4	17272.6	9905.81	11033.7	12203.3	PE(O-39:4)PE(P-39:3)	PE(O-39:4) PE(P-39:3)	M-H	C44H83NO7P+	41.1	0	4.33168	90.9266	-0.1979
PE(O-40:3) PE(P-40:2)	12.57_782.6104m/z		782.61	12.5696	239325	1.37	199965	206074	194443	181506	185052	174741	168377	158533	183231	169413	204296	228901	271146	217929	231623	219990	240283	209777	203387	172380	85039.2	221200	209858	222711	237850	247563	LMGP02030083	PE(O-40:3) PE(P-40:2)	M-H	C45H86NO7P	57.1	0	3.52404	97.6291	-0.0046
PE(O-40:4) PE(P-40:3)	12.06_780.5944m/z		780.594	12.0608	163476	0.24	122307	128402	118869	114889	115276	84828.7	87493.9	79756.8	116327	111368	122299	160565	185237	144627	128143	116800	113993	138838	131322	111149	85039.2	157116	146974	146287	158159	171796	LMGP02020083	PE(O-40:4) PE(P-40:3)	M-H	C45H84NO7P	38.1	0	3.97139	95.1229		http://nonlinear.com/redirect/outbound?p=lipidmaps&param=LMGP02020083
PE(O-40:5) PE(P-40:4)	11.62_778.5791m/z		778.579	11.6208	124893	2.39	37136.3	41513.5	38205.1	33062.6	34790.4	101107	140313	133260	51880	46236.3	50762.9	27877.2	32426.1	26009.2	37664.7	35942.2	37129.9	23673.3	20851.6	18288.9	85039.2	28212.8	25696.7	17098	17684.6	20578.9	LMGP02020084	PE(O-40:5) PE(P-40:4)	M-H	C45H82NO7P	36.6	0	4.49595	88.2577		http://nonlinear.com/redirect/outbound?p=lipidmaps&param=LMGP02020084
PE(O-40:6) PE(P-40:5)a	9.98_776.5633m/z		776.563	9.98448	25163.8	3.52	11827.4	9038.67	9258.23	8094.18	7522.51	2546.93	2212.47	2005.53	3660.41	3925.26	3828.1	10128.5	10592.1	9493.71	5033.46	4024.4	3848.88	8607.98	8425.07	7906.37	85039.2	5593.64	5578.63	23810.5	26164.9	25516	LMGP02030086	PE(O-40:6) PE(P-40:5)a	M-H	C45H80NO7P	36.6	0	4.23612	87.7962		http://nonlinear.com/redirect/outbound?p=lipidmaps&param=LMGP02030086
PE(O-40:6) PE(P-40:5)b	11.11_776.5635m/z		776.563	11.112	91061.2	0.42	41632.5	45071.8	41894.6	39458.1	39694.6	89056	96535.4	87592.4	58357.3	52396.8	58484.8	41517	45610.9	36272.1	18989.2	18966.7	21025.4	53923.3	45363	40103.3	85039.2	41432.5	37942.8	40038.4	40113.4	45671.3	LMGP02030086	PE(O-40:6) PE(P-40:5)b	M-H	C45H80NO7P	52.7	0	2.77916	95.0619	-0.018
PE(O-40:6) PE(P-40:5)c	11.40_776.5635m/z		776.563	11.4008	120057	1.61	40838.8	44823.3	41130.4	35253.4	36452.4	50307.7	51805.2	50491.9	11924.3	13384.4	13320.4	23329.4	28441.4	25189.6	118407	115456	126309	21537.5	17806.5	15185.9	85039.2	50789.2	40727.3	11592.7	11883.3	13738.4	LMGP01020175	PE(O-40:6) PE(P-40:5)c	M-H	C45H80NO7P	56.1	0	2.97356	92.2675	-0.0043
PE(O-40:6) PS(P-40:5)	11.30_820.5514m/z		820.551	11.3045	11347.2	3.36	7330.1	8631.01	8005.14	7200.38	7550.85	7198.56	7350.1	6556.69	11924.4	10382.8	11734.3	9300.07	11585.6	8362.47	7247.01	5682.04	5819.14	9302.75	8785.19	7294.92	85039.2	10263.5	8565.14	9664.83	9771	11241.1	LMGP03020083	PE(O-40:6) PS(P-40:5)	M-H	C46H80NO9P	36.6	0	1.96849	85.2695		http://nonlinear.com/redirect/outbound?p=lipidmaps&param=LMGP03020083
PE(O-40:7) PE(P-40:6)a	10.60_774.5477m/z		774.548	10.6033	50222.9	0.75	33977.9	34386.2	31168.2	32194.9	31854.4	29385.2	28715.3	24700	32572.3	30538.3	31023.9	40054.9	45200.5	35181.9	15882.8	15195.6	15327.7	54292	49739.3	45008.9	85039.2	36567.4	35146.6	48036.7	48803.4	53828.8	LMGP02030005	PE(O-40:7) PE(P-40:6)a	M-H	C45H78NO7P	51.9	0	2.91484	92.3383	-0.0179
PE(O-40:7) PE(P-40:6)b	10.88_774.5478m/z		774.548	10.8783	190665	0.78	117408	122802	113263	95480.4	96532.8	48606.2	43446.2	38449.4	34568	34589.8	38972.7	70743.9	77953.7	62456.7	183158	188307	200529	190085	163881	137379	85039.2	62929.5	58653.1	160609	164503	181790	LMGP02030005	PE(O-40:7) PE(P-40:6)b	M-H	C45H78NO7P	52.7	0	2.73384	95.5086	-0.0179
PE(O-42:4) PE(P-42:3)a	12.65_808.6262m/z		808.626	12.6521	46834.3	1.66	24929.5	26631.2	24262.9	27036.7	26409.1	23849	25610.1	21048.1	16963.1	17055.4	18676.8	34641.7	41078.8	31917.4	27239.9	24381.8	21145.9	29240.5	30097.8	25792.5	85039.2	46167.4	49854.5	25680.7	26746.4	26623	LMGP02020088	PE(O-42:4) PE(P-42:3)a	M-H	C47H88NO7P	56.7	0	3.06969	95.342	-0.0046
PE(O-42:4) PE(P-42:3)b	12.90_808.6262m/z		808.626	12.8996	29672.6	3.64	16021.9	17660.5	16264.5	16098.5	16948.6	20133.4	19455.9	14843.6	22001.8	20108.3	26124.2	28012.3	33474.5	27531	15024.7	17078	17803.3	16229.2	14555.2	16121.1	85039.2	21662.3	22106.4	16058.8	14512.6	17317.2	LMGP02020088	PE(O-42:4) PE(P-42:3)b	M-H	C47H88NO7P	41.9	0	4.32107	95.1394	0.2133
PE(O-42:5) PE(P-42:3)c	12.13_806.6106m/z		806.611	12.1296	18507.2	0.39	12563.3	13286.1	12155.9	12430.8	12362.5	7756.09	8634.94	6822.92	9324.06	8994.21	10359.6	17663.2	21376.1	16482.2	11504.2	10580.8	9613.28	16304.1	15652.7	14983.4	85039.2	16683.6	16708	15986.2	16509.7	18324.4	LMGP02030091	PE(O-42:5) PE(P-42:3)c	M-H	C47H86NO7P	47.3	0	4.666	91.0282	-0.0481
PE(O-42:6) PE(P-42:5)a	11.72_804.5943m/z		804.594	11.7171	20326.3	2.96	5838.61	6478.73	5424.25	6013.43	5766.68	16165.2	25075	19738.6	4518.24	3892.95	4219.07	5231.49	6091.73	4379.6	5741.93	5419.75	4750.08	5586.72	4692.39	4381.23	85039.2	7201.76	7312.53	2373.74	2726.83	3101.37	LMGP02020089	PE(O-42:6) PE(P-42:5)a	M-H	C47H84NO7P	36.6	0	3.75958	87.2603		http://nonlinear.com/redirect/outbound?p=lipidmaps&param=LMGP02020089
PE(O-42:6) PE(P-42:5)b	11.91_804.5949m/z		804.595	11.9096	7132.71	2.09	2534.38	2935.43	2737.21	2117.18	2384.45	4152.25	4823.2	3842.46	1120.23	1126.6	1083.65	1818.84	2158.08	1794.76	7291.96	6626.65	7479.52	1555.55	1298.91	1247.53	85039.2	3411.03	2847.87	942.032	917.192	1178.7	LMGP02020089	PE(O-42:6) PE(P-42:5)b	M-H	C47H84NO7P	36.7	0	4.53628	88.5922		http://nonlinear.com/redirect/outbound?p=lipidmaps&param=LMGP02020089
PE(O-42:7) PE(P-42:6)	11.21_802.5795m/z		802.58	11.2083	6377.79	2.45	3279.89	3619.52	3399.16	3248.24	3381.87	3553.32	4905.58	3018.34	2517.7	2618.64	2634.98	3673.8	3597.7	3004.95	2214.13	2073.13	1675.87	7118.88	6105.83	5908.66	85039.2	3322.91	3881.37	4919.29	5063.2	5521.11	LMGP02030092	PE(O-42:7) PE(P-42:6)	M-H	C47H82NO7P	51	0	3.0743	86.8093	-0.018
PE(P-34:1)	10.82_700.5318m/z		700.532	10.8233	25233.6	1.16	9982.51	11545.9	10485.6	10540.9	10015.7	25119.6	25016.4	25564.9	17118.7	22717.9	20533.6	15956.2	15735.4	11136.1	4299.68	3652.42	4528.56	5703.42	6865.42	5743.97	85039.2	10470	9451.31	9778.9	10472	12029.5	HMDB11342	PE(P-34:1)	M-H	C39H76NO7P	56.3	0	2.7679	93.6528	-0.0042
PE(P-37:3)	11.02_738.5480m/z		738.548	11.0158	3738.33	1	1919.13	2655.98	2388.3	2347.42	2380.86	1713.86	1348.97	991.993	3419.21	2996.45	3130.11	3434.14	3745.5	3293.61	3628.44	2111.27	2097.87	3192.11	3110.68	2727.35	85039.2	3879.96	3534.41	1796.62	2034.47	2609.66	PE(P-37:3)	PE(P-37:3)	M-H	C42H79NO7P+	40.1	0	4.97009	83.3032	-0.1542
PE(P-37:4)	10.62_736.5323m/z		736.532	10.617	49236.8	1.01	11646.3	13610.8	12238	12110.7	12285.2	53384.3	46120.1	48205.9	36436.8	32418.4	33049	13480.4	14245.4	13003.1	4672.02	2614.31	3330.21	2501.45	2221.46	2092.57	85039.2	17634.2	13669.9	1208.7	1088.44	1559.32	PE(P-37:4)	PE(P-37:4)	M-H	C42H77NO7P+	56.7	0	2.22499	95.0339	-0.0042
PE(P-37:5)	10.07_734.5165m/z		734.516	10.067	34700.2	0.91	15983.1	17127.7	15927.1	15904.4	16110	16980.9	14266.5	14579.4	37306	32107.4	34687.3	20376.6	21879.4	18218.8	9728.93	6587.24	7184.21	25068.2	21927.3	19941.4	85039.2	18696.6	17086.1	17447.1	18243.3	21563.6	PE(P-37:5)	PE(P-37:5)	M-H	C41H87NO7P+	56.6	0	2.7636	95.1452	-0.004
PE(P-39:2)	12.20_768.5947m/z		768.595	12.1983	61726	1.5	36196.7	38804.7	35327	36963.2	37756.5	32369.3	22572	25198.4	40348.5	37904	42098.7	50349.3	57281	48439.1	65798.1	47749.2	49864.3	37624.3	35032.7	31095.6	85039.2	66045.6	60827.8	24770	27004.5	28438.5	PE(P-39:2)	PE(P-39:2)	M-H	C44H85NO7P+	56.6	0	3.06187	94.6907	-0.0045
PE(P-39:4)	11.22_764.5632m/z		764.563	11.222	21253	2.05	7626.22	8258.6	7952.11	7907.45	7553.9	21432.7	20756.8	21569.4	17619.1	15626.5	15710.1	8034.97	9242.68	8037.49	7961.56	5373.72	5735.87	4917.63	4350.5	3667.71	85039.2	12033.2	10162.7	1948.69	2243.54	2691.86	PE(P-39:4)	PE(P-39:4)	M-H	C44H81NO7P+	41.1	0	4.30706	86.5417	-0.148
PE(P-39:6)	10.45_760.5319m/z		760.532	10.452	23666.1	1.4	12846.1	14256.5	12851.1	12458.9	12707.9	6181.15	4487.07	4224.13	7264.43	7005.4	7637.75	12325	12838.2	10957.8	26486.8	18183.2	20236.5	26733	23378.6	20886.6	85039.2	15548.4	13641.2	13482.5	14889.4	16281.9	PE(P-39:6)	PE(P-39:6)	M-H	C44H77NO7P+	51.8	0	3.28759	92.2482	-0.0179
PE(P-41:2)	12.94_796.6261m/z		796.626	12.9409	11568.9	0.73	5073.79	5235.96	4513.84	4880.25	4748.79	2951.93	2383.18	1945.5	4558.91	3919.66	4818.08	5709.83	7017.63	6265.41	14824.1	10413.2	9469.43	4453.06	4326.42	4161.94	85039.2	7490.12	7462.88	2502.02	2826.18	2847.18	PE(P-41:2)	PE(P-41:2)	M-H	C46H89NO7P+	48.8	0	4.49479	91.4707	-0.0391
PE(P-41:3)	12.42_794.6105m/z		794.61	12.4183	10433.9	0.19	5687.61	6049.77	5355.14	6229.55	6212.48	3894.03	2861.49	2738.79	6555.89	6241.35	6968.71	9330.09	10706.9	9213.69	8254.46	6042.39	5700.83	7576.75	7108.82	6542.26	85039.2	11180.6	10490.6	4390.5	4788.09	5328.7	PE(P-41:3)	PE(P-41:3)	M-H	C46H87NO7P+	47.8	0	4.43284	89.1446	-0.0417
PG(32:0)	7.95_721.5059m/z		721.506	7.94938	264261	1.27	143392	138744	135482	111700	113729	258818	68850	113929	111815	70017	95672.2	45404.1	32938.4	36982.5	136222	83127.6	94102.1	200485	186921	228112	85039.2	38750.3	32629.4	234993	251740	306051	LMGP04010986	PG(32:0)	M-H	C38H75O10P	38.4	0	4.64619	97.5708		http://nonlinear.com/redirect/outbound?p=lipidmaps&param=LMGP04010986
PI(34:7)	9.67_935.5699m/z		935.57	9.66822	38657.2	1.98	9748.65	10220	9970.51	10432	10728.8	2773.67	2083.93	2065.66	2250.01	2007.25	2360.15	3125.44	3028.32	3457.32	40847.8	30725.6	44398.4	18209.4	16542.5	16194.1	85039.2	6198.67	6461.5	13190.1	16185.7	11531.4	LMGP06010525	PI(34:7)	M-H	C51H85O13P	48.6	0	3.09296	95.2349	0.0372
PI(38:3)	10.04_887.5693m/z		887.569	10.0395	4903.54	8.46	1176.78	1544.7	1584.33	1208.14	1561.86	84.2612	34.0048	0	143.357	206.027	270.46	433.363	438.065	502.747	5562.16	4870.64	4277.82	2548.15	2006.9	2395.21	85039.2	311.723	603.005	3524.35	4380.38	3791.23	HMDB09887	PI(38:3)	M-H	C47H85O13P	32.4	0	4.25006	67.0178		http://nonlinear.com/redirect/outbound?p=hmdb&param=HMDB09887
PI(38:4)	9.65_885.5537m/z		885.554	9.65447	111889	0.73	31431.8	31260.4	33343.7	43238.4	42796	96109.4	100941	138616	53511.6	50693.3	53441.7	43939.2	41757.4	43201.5	34934.7	24683.1	30202.7	67417.3	61509.2	69775.4	85039.2	31444	33292.3	39000.7	50281.9	41773.2	HMDB09912	PI(38:4)	M-H	C47H83O13P	47.5	0	3.20607	97.6373	0.0509833
PI(38:5)	9.15_883.5381m/z		883.538	9.14568	63217.5	2.38	14090.3	13591.1	14222	19388.8	20270.8	15872.8	15554.1	21428.7	18020	16209	17267	13805	12828.2	14258.5	7018.44	5455.99	6507.49	64657.7	56479.2	68515.5	85039.2	8263.66	11481.2	32313.6	44465.8	34910.1	HMDB09804	PI(38:5)	M-H	C47H81O13P	46.8	0	3.20078	87.3844	0.03645
PI(40:3)a	7.52_916.6106n	916.611	915.603	7.52313	32601.6	1.85	17824.4	11372.1	13839.4	12276.3	12601.3	11.3318	11720.4	34826.8	13825.5	15502.5	16160.1	32288.9	42541.1	22974.8	12.3702	7951.81	9843.98	12265.9	20939.8	7759.46	85039.2	19342	22832.3	12280.3	9093.62	5796.35	LMGP06010680	PI(40:3)a	M-H, M+Cl, M+FA-H	C49H89O13P	43.5	0	2.83228	94.4832	-0.0876667
PI(40:3)b	10.73_915.6011m/z		915.601	10.727	96085.4	0.7	20239.9	20689.3	21051.3	17063.8	16770.1	1731.59	1394.15	1288.09	5188.13	4595.45	5882.67	5297.66	5492.03	5673.38	86213.5	98968.5	103074	6315.15	6381.87	6399.58	85039.2	6829.59	7771.07	17928.1	21176.3	15222.9	LMGP06010680	PI(40:3)b	M-H	C49H89O13P	38.4	0	4.69704	97.4681		http://nonlinear.com/redirect/outbound?p=lipidmaps&param=LMGP06010680
PI(40:4)	10.18_913.5855m/z		913.585	10.177	74326.5	1.79	20979.1	21508.2	21724.9	17471.5	18200.4	1214.36	1260.84	1415.75	3296.26	3447.4	3970.33	4257.75	3909.33	4788.83	79567.9	73774.3	69637.2	15943.9	15205.2	15787.1	85039.2	5791.45	6478.16	34171.6	40366.6	30760.7	HMDB09913	PI(40:4)	M-H	C49H87O13P	47.7	0	3.07386	97.4649	0.0509
PI(40:5)	9.79_911.5698m/z		911.57	9.79198	435495	0.32	167840	165619	167935	212494	211535	325918	328067	431913	437325	425224	443935	165988	172132	171802	284574	189768	218755	268471	270795	269999	85039.2	215727	219361	186083	234668	183468	HMDB09904	PI(40:5)	M-H	C49H85O13P	47.8	0	3.06783	98.9113	0.0510167
PI(40:6)	9.27_909.5541m/z		909.554	9.26943	179749	1.11	51975.4	50285.1	52674.7	73702.1	72549.9	51845.3	45191.6	56011.2	112832	119758	121075	37542	35142.4	37339	51211.1	39511	46889.1	179824	174617	184805	85039.2	40459.3	49230.7	111700	162176	122627	LMGP06010012	PI(40:6)	M-H	C49H83O13P	48.7	0	3.12785	96.6802	0.03715
PI(42:6)	10.19_937.5854m/z		937.585	10.1908	27423.2	1.9	5277.94	5479.48	5353.47	6004.1	5554.05	3467.36	3710.67	4277.4	1365.84	1542.53	1770.94	1831.49	1493.74	2543.32	26694.3	24669.9	30905.3	7262.44	6376.36	6538.62	85039.2	3997.97	4549.71	2219.72	3329.36	2417.19	LMGP06010830	PI(42:6)	M-H	C51H87O13P	36.7	0	4.50587	88.5612		http://nonlinear.com/redirect/outbound?p=lipidmaps&param=LMGP06010830
PI(O-28:0)a	8.62_740.4813n	740.481	739.474	8.62315	31692.6	0.34	8261.55	8953.01	9491.73	7749.05	7786.58	13320.5	27971.4	22693.7	33224	31325.2	30528.5	3626.72	2852.42	2668.34	493.998	1515.58	759.386	4706.16	4417.28	4272.87	85039.2	4709.9	5961.14	10620.2	10153.3	9869.62	LMGP06020002	PI(O-28:0)a	M-H, M+Na-2H	C37H73O12P	36.8	0	-3.62392	88.4214		http://nonlinear.com/redirect/outbound?p=lipidmaps&param=LMGP06020002
PI(O-28:0)b	8.91_740.4815n	740.482	739.474	8.91192	41445.1	0.99	10069.5	11855.3	11518.2	11160.2	10976.8	38571.1	40568.2	45195.9	11826.4	11238.1	10351	10376.9	10340.8	9342.4	1244.75	1436	1558.95	10417.3	10218	9820.93	85039.2	8684.26	9595.72	11026.9	10997	11199.8	LMGP06020002	PI(O-28:0)b	M-H, M+Na-2H	C37H73O12P	37.4	0	-3.29495	90.6387		http://nonlinear.com/redirect/outbound?p=lipidmaps&param=LMGP06020002
PI(O-28:1) PI(P-28:0)	8.54_738.4658n	738.466	737.459	8.54067	26535.6	1.37	11537	11855.7	11719.7	10764.3	10316.3	5891.07	5333.81	5402.19	8113.43	8855.51	8464.3	10221.5	11144.7	9397.94	24890.2	26810.1	27906.5	8510.05	8221.23	7756.15	85039.2	12406.7	11702.9	11480.7	10929.2	11230.4	LMGP06030002	PI(O-28:1) PI(P-28:0)	M-H, M+Na-2H	C37H71O12P	36.8	0	-3.38696	87.735		http://nonlinear.com/redirect/outbound?p=lipidmaps&param=LMGP06030002
PI(O-29:0)	9.20_754.4966n	754.497	753.489	9.20068	15615.7	1.43	5163	5712.41	5723.67	5721.54	5522.17	18008.6	12940.8	15897.7	4165.75	3587.02	3195.4	7482.64	7320.02	6178.54	433.008	347.383	400.692	6376.1	5991.09	5126.99	85039.2	7338.26	6500.7	6089.49	5929.24	6063.68	LMGP06020003	PI(O-29:0)	M-H, M+Na-2H	C38H75O12P	36.8	0	-4.05062	88.5052		http://nonlinear.com/redirect/outbound?p=lipidmaps&param=LMGP06020003
PI(O-30:1) PI(P-30:0)	9.13_766.4959n	766.496	765.489	9.13193	7929.55	2.9	3365.16	4215.89	3724.29	3945.42	4110.6	1785.62	1614.37	1799.91	2537.7	3113.94	2897.25	7461.76	9282.92	7043.95	1027.77	1305.24	1101.96	5193.61	5115.91	3868.07	85039.2	7396.54	6443.02	5326.5	5894.26	5810.63	LMGP06030004	PI(O-30:1) PI(P-30:0)	M-H, M+Na-2H	C39H75O12P	35.6	0	-4.91076	83.46		http://nonlinear.com/redirect/outbound?p=lipidmaps&param=LMGP06030004
PI(O-38:4) PI(P-38:3)	10.11_871.5744m/z		871.574	10.1082	29943.7	2.3	10388.3	10861.7	10523.3	11972.4	11409.9	23071.9	35434.5	31324.8	26193.6	22839.3	24449.6	9309.68	9560.11	10427.9	7742.91	8243.57	9056.46	13938.1	13159.6	12708.3	85039.2	10622.1	9828.83	8113.59	9345.51	8991.77	LMGP06020057	PI(O-38:4) PI(P-38:3)	M-H	C47H85O12P	46.5	0	2.98848	83.3571	0.0372
PI(O-38:5) PI(P-38:4)	9.60_869.5594m/z		869.559	9.59947	9187.28	0.67	3776.05	3885.72	4071.39	3806.6	3770.78	3068.55	4657.89	3852.65	10186.4	8305.22	8603.53	1348.75	1289.18	1816.07	4656.49	5860.47	5150.11	9490.76	8663.39	9407.7	85039.2	2830.24	2893.58	5015.76	6079.99	6408.25	LMGP06030091	PI(O-38:5) PI(P-38:4)	M-H	C47H83O12P	43.9	0	4.03217	72.9154	0.0372333
PI(O-40:6) PI(P-40:5)	9.98_895.5729m/z		895.573	9.98448	4532.63	1.52	1413.86	1608.36	1527.54	1683.09	1719.79	672.827	775.107	850.79	593.087	584.73	486.048	1077.89	1216.69	1344.21	2406.43	1923.83	1560.65	4770.64	4290.13	4537.13	85039.2	834.159	1043.54	3545.29	4594.72	4173.9	LMGP06030081	PI(O-40:6) PI(P-40:5)	M-H	C49H85O12P	36.7	0	2.53957	86.3986		http://nonlinear.com/redirect/outbound?p=lipidmaps&param=LMGP06030081
PIP(38:4)	7.87_965.5190m/z		965.519	7.86688	44774.4	3.66	7237.1	6923.11	6633.7	4640.19	4887.07	260.354	52.9913	28.6556	930.106	1029.3	161.664	2148.45	242.724	676.825	79172	34133.5	21017.8	25.8571	6.14614	11.8279	85039.2	918.059	796.487	37.8163	7.13535	0.837571	HMDB09936	PIP(38:4)	M-H	C47H84O16P2	37.8	0	2.88245	92.5833		http://nonlinear.com/redirect/outbound?p=hmdb&param=HMDB09936
PS(36:0)	9.78_790.5638m/z		790.564	9.77823	19123.2	3.22	9377.54	8502.11	8740.03	10035.5	10502.7	19876.9	17820.7	19665.7	12485.1	13515.7	13166	18104.4	15771.1	15365.6	10634.1	10662.2	8915.57	6763.33	7813.82	7250.3	85039.2	17455.6	20189.9	3783.96	3607.68	4040.42	LMGP03010848	PS(36:0)	M-H	C42H82NO10P	35.1	0	4.28797	80.5377		http://nonlinear.com/redirect/outbound?p=lipidmaps&param=LMGP03010848
PS(36:1)	9.17_788.5484m/z		788.548	9.17318	6677.64	0.73	2726.18	2172.01	2448.77	3098.43	3130.38	3069.35	1958.1	2235.75	2154.52	2406.78	2079.11	5219.71	4108.51	4800.41	6426.44	5888.25	5304.94	1488.89	2016.52	2058.33	85039.2	5860.17	6961.32	1004.82	1505.08	1227.85	LMGP03010702	PS(36:1)	M-H	C42H80NO10P	36.7	0	4.66717	88.8307		http://nonlinear.com/redirect/outbound?p=lipidmaps&param=LMGP03010702
PS(36:3)	8.22_784.5170m/z		784.517	8.2244	4921.83	2.22	1270.83	1219.2	1228.39	1114.28	1030.87	107.291	64.7735	83.4458	0	0	0	194.096	113.493	210.596	4892.74	5414.68	4458.06	879.263	947.62	838.531	85039.2	250.953	374.758	1129.71	1059.45	1286.74	LMGP03010903	PS(36:3)	M-H	C42H76NO10P	42.6	0	2.88539	85.2404	-0.07405
PS(38:0)	10.62_818.5955m/z		818.596	10.617	9117.94	0.06	3556.74	3157.35	3183.86	3914.58	3911.54	9061.12	3481.78	4469.18	4850.19	4842.69	4754.95	8442.21	6816.48	7140.83	4687.77	4670.48	3966.97	1097.14	1205.87	1316.01	85039.2	8353.3	9569.83	631.235	835.301	835.201	HMDB10164	PS(38:0)	M-H	C44H86NO10P	35.8	0	4.72239	84.5151		http://nonlinear.com/redirect/outbound?p=hmdb&param=HMDB10164
PS(38:2)	10.95_814.5642m/z		814.564	10.947	7480.27	0.64	2676.2	1978.25	2804.47	3264.63	3294.28	3645.98	4070.18	5538.9	3657.06	4426.65	3213.16	6080.58	5554.15	10806.1	1838.59	2165.22	2086.35	2226.29	3549.78	3768.81	85039.2	5052.57	5025.43	1414.35	1329.04	1011.5	LMGP03010950	PS(38:2)	M-H	C44H82NO10P	39.6	0	2.77491	87.8661	0.2846
PS(38:3)b	10.44_813.5559n	813.556	858.53	10.4383	9697.57	0.52	5107.81	4696.84	5502.85	5794.61	5705.27	4032.11	5733.06	7211.32	7673.41	8970.82	6041.61	6149.76	5096.92	7874.74	5395.47	6042.33	5610.1	9748.79	9695.45	9648.48	85039.2	6590.62	6469.81	6121.59	6534.54	6395.14	LMGP03010518	PS(38:3)b	M-H, M+FA-H	C44H80NO10P	36.5	0	4.8454	88.0266		http://nonlinear.com/redirect/outbound?p=lipidmaps&param=LMGP03010518
PS(38:5)	9.23_808.5174m/z		808.517	9.22818	19917.2	1.88	8331.43	8466.5	9020.32	10315.8	9988.42	11234.9	13373.2	18515.4	18042.8	21505.5	20203.4	10725.7	12332.9	12048.4	3368.66	2676.44	3521.26	16641.3	16387.2	17012.3	85039.2	8578.55	7554.45	14908.1	15229.6	18156.3	LMGP03010884	PS(38:5)	M-H	C44H76NO10P	50.1	0	2.2332	91.1915	0.0233
PS(38:6)	8.80_806.5016m/z		806.502	8.80192	11519.2	2.64	5485.29	5202.93	5713.27	6103.71	6335.57	2571.35	2831.24	3980.6	7349.07	7830.23	7090.01	5499.07	5790.68	6606.07	10285.1	6697.01	6992.62	10272.8	11347.4	12937.4	85039.2	6513.24	5481.77	8770.29	10315.7	10490.3	HMDB12442	PS(38:6)	M-H	C44H74NO10P	47	0	3.14042	88.7421	0.0358333
PS(39:0)	11.03_832.6114m/z		832.611	11.0295	18864.6	0.07	11583.4	9756.18	9550.47	9793.08	9783.09	12609.3	12614	10987.2	17275	16997.4	17389.1	10151.2	9737.84	9107.66	18042.1	19928.3	18623.3	8702.88	9347.18	8381.71	85039.2	10283.7	11731.7	8880.35	8675.25	8912.97	LMGP03010244	PS(39:0)	M-H	C45H88NO10P	42.2	0	3.02669	91.8666	-0.1556
PS(39:3)	9.59_827.5714n	827.571	826.564	9.58572	519105	0.02	109641	100952	103305	108137	108101	470570	561165	525580	301375	292044	290706	77763.8	80708.1	71228.1	54653.9	55312.6	52896.7	34678	33054.3	31288.1	85039.2	94103.8	85213.1	36606.8	33060.8	37748.4	LMGP03010471	PS(39:3)	M-H, M+Cl	C45H82NO10P	38.2	0	4.58306	96.3429		http://nonlinear.com/redirect/outbound?p=lipidmaps&param=LMGP03010471
PS(39:6)	9.21_820.5175m/z		820.518	9.21443	7533.36	3.48	2512.98	2903.66	2772.48	3684.2	3870.01	1311.31	1629.4	1752.27	1292.39	2003.65	1881.76	6347.18	6809.14	7087.58	4703.1	3592.8	4162.36	5270.33	5580.36	6018.03	85039.2	8148.15	6684.75	3031.57	3290.02	3666.72	LMGP03010504	PS(39:6)	M-H	C45H76NO10P	47.1	0	2.66778	88.1496	0.0369
PS(40:1)	10.86_844.6111m/z		844.611	10.8645	6321.72	0.74	2521.33	1948.03	1716.86	2408.65	2383.43	2375.12	423.76	907.206	1463.36	1715.76	1905.26	5351.32	4549.21	4244.38	3772.51	4155.15	3203.27	996.591	1093.87	1212.84	85039.2	5725.52	7080.45	663.554	729.757	823.076	LMGP03010948	PS(40:1)	M-H	C46H88NO10P	35.6	0	4.43421	83.0152		http://nonlinear.com/redirect/outbound?p=lipidmaps&param=LMGP03010948
PS(40:2)	11.32_843.6026n	843.603	842.595	11.3183	24378.7	2.16	12339.6	13403.9	13622.6	14217.6	14658.4	6916.52	7728.03	10532.1	6127.55	7358	8736.9	21209.3	26192.2	25734.5	14187.6	13065.2	15179.3	22975.7	21342.6	21064.1	85039.2	20762.1	18216.6	19570	19391.3	21366.1	LMGP03010710	PS(40:2)	M-H, M+Na-2H	C46H86NO10P	48.9	0	2.581	92.2572	0.037
PS(40:3)b	11.06_841.5870n	841.587	840.58	11.057	35020.9	0.42	18855.2	13361.9	19326.5	20528.9	20651.2	23961.7	28163.3	41734.7	31396.7	36248.2	25300.2	30659.5	27149.5	47253.6	12329.5	14520.6	15162.1	17593.1	22477.8	24655.7	85039.2	29417.1	27413	17311.9	14992.2	11946.1	LMGP03010522	PS(40:3)b	M-H, M+Na-2H	C46H84NO10P	37.1	0	4.43661	90.5349		http://nonlinear.com/redirect/outbound?p=lipidmaps&param=LMGP03010522
PS(40:4)	9.35_838.5641m/z		838.564	9.35195	55688.4	0.85	33282.2	28229.4	29411.5	34078.5	33483	60330.3	51863.9	54871.1	31883	30912.2	29587.6	48865.3	37735.5	34827.2	29081.2	28643.2	26552.3	55234	54582.7	54337.4	85039.2	40908.1	41440.4	30748.4	28519	31701.8	LMGP03010862	PS(40:4)	M-H	C46H82NO10P	43.4	0	3.22951	92.9998	-0.10025
PS(40:5)	10.15_836.5485m/z		836.548	10.1495	10591.4	4.75	2089.02	2218.89	2440.61	3103.87	2805.45	6717.48	10257.4	14799.4	1826.68	2272.76	1085.69	1459.05	1336.16	2401.74	7538.67	6855.44	7251.07	598.895	808.288	808.485	85039.2	5577.6	4065.7	683.688	585.623	698.824	LMGP03010550	PS(40:5)	M-H	C46H80NO10P	38.2	0	2.56459	83.0837	0.326017
PS(40:6)a	9.35_832.5176m/z		832.518	9.35195	7436.26	5.24	4090.45	2680.74	4227.52	3889.35	4188.56	2391.1	2713.49	3506.73	2684.81	3278.58	2276.34	4898.22	3812.11	6589.73	3714.05	4615.77	4850.71	5685.72	7753.48	8869.58	85039.2	4465.19	4985.88	3822.87	3799.56	2738.63	HMDB12445	PS(40:6)a	M-H	C46H76NO10P	39	0	2.70563	90.9414	0.448967
PS(40:6)b	9.64_835.5401n	835.54	834.533	9.64072	57114.9	1.52	26366.9	25379.5	27428.1	30804.7	31472.5	17894.2	19833.7	26264.6	12801.9	16442	17632.8	54707.7	60200.1	56437.1	31556.1	31870.5	33016.2	41546.4	45134.6	45313.5	85039.2	46773.3	39489.9	35556.7	38474.2	43189.3	HMDB12444	PS(40:6)b	M-H, M+Na-2H	C46H78NO10P	48.1	0	2.25687	91.884	0.0372333
PS(40:7)	10.05_832.5148m/z		832.515	10.0532	3673.1	2.93	2267.51	2083.86	2169.59	2192.28	2103.42	1494.89	3230.61	2721.49	3218.16	3486.43	3711.56	1370.32	1581.63	1448.9	1120.87	1286.55	1410.82	3827.8	3682.49	3509.01	85039.2	1156.3	1238.35	3124.14	2777.36	3124.68	HMDB12437	PS(40:7)	M-H	C46H76NO10P	35.7	0	1.69711	80.4129		http://nonlinear.com/redirect/outbound?p=hmdb&param=HMDB12437
PS(41:3)	10.25_855.6028n	855.603	854.595	10.2458	49106.4	1.98	12427.2	11558.6	11861.8	12571.1	12223.8	39130.5	53416.8	54771.9	17757.7	16974.9	17191	10400.8	10891	9368.78	13081.7	13177.6	10228	5055.42	4959.53	4645.5	85039.2	12598.6	12428.8	6346	6366.97	6685.19	LMGP03010695	PS(41:3)	M-H, M+Cl	C47H86NO10P	36.8	0	4.46207	89.0386		http://nonlinear.com/redirect/outbound?p=lipidmaps&param=LMGP03010695
PS(42:4)a	9.39_866.5955m/z		866.595	9.3932	28204.1	0.21	9860.55	8829.95	8801	9933.56	9904.55	2981.33	2564.15	2126.72	4248.94	4615.58	5042.54	29252	29519	25841.4	1125.38	1119.07	1405.95	13851.1	14624.6	14346.5	85039.2	11478.8	11925	15434.1	15476.9	15943.4	LMGP03010719	PS(42:4)a	M-H	C48H86NO10P	37.6	0	4.3845	92.86		http://nonlinear.com/redirect/outbound?p=lipidmaps&param=LMGP03010719
PS(42:4)b	10.15_866.5956m/z		866.596	10.1495	15848.8	0.34	5856.22	5269.55	5390.92	6574.72	6606.05	15353.5	14167.8	15454	6584.4	6710.26	6402.96	9354.23	8040.96	7839.88	7399.23	7237.76	6228.45	3523.26	3401.78	3237.85	85039.2	16807	16031.7	1814.12	1605.8	2064.94	LMGP03010719	PS(42:4)b	M-H	C48H86NO10P	36.1	0	4.55029	86.0119		http://nonlinear.com/redirect/outbound?p=lipidmaps&param=LMGP03010719
PS(42:5)b	9.89_864.5798m/z		864.58	9.88823	50228.8	0.78	24581.1	20825.1	20989.4	26645.6	26241.2	21786.1	17924.9	17775.9	11621.3	11704.6	11874.2	57730.7	47077.5	42484.3	36822.9	35886.3	32233.4	30521.6	30719.7	30243.4	85039.2	51899.5	53493.8	16307.4	14638.5	16943.3	LMGP03010748	PS(42:5)b	M-H	C48H84NO10P	43.4	0	3.08746	94.0701	-0.114067
PS(42:6)	9.17_862.5641m/z		862.564	9.17318	4034.69	1.2	1824.61	1464.04	1629	2228.15	2114.25	579.378	269.966	107.72	753	361.895	569.29	3835.97	3388.05	3010.89	3336.41	2995.71	2853.51	3952.23	3980.66	3888.12	85039.2	4050.03	4439.89	2025.45	1676.72	1902.54	LMGP03010749	PS(42:6)	M-H	C48H82NO10P	35.2	0	4.30701	81.0762		http://nonlinear.com/redirect/outbound?p=lipidmaps&param=LMGP03010749
PS(42:7)	9.76_860.5484m/z		860.548	9.76448	3209.5	3.38	1226.41	1254.47	1449.08	1405.73	1596.76	200.615	223.508	315.571	555.788	634.909	878.35	1059.53	1476.15	1784.47	3537.52	3103.18	2987.8	1941.88	2175.14	2308	85039.2	2114.06	1939.97	1743.48	1837.92	1858.13	LMGP03010557	PS(42:7)	M-H	C48H80NO10P	46.1	0	2.37738	81.6756	0.0372667
PS(44:6)	10.01_890.5952m/z		890.595	10.012	7308.38	4.03	2156.63	2023.13	1762.34	2548.36	2866.83	568.461	404.244	287.864	114.01	261.917	76.4015	4746.6	3279.51	3747.85	5054.81	5089.39	4100.94	1982.88	2148.81	2080.6	85039.2	7591.34	7850.44	1066.47	937.384	1153.35	LMGP03010973	PS(44:6)	M-H	C50H86NO10P	35.4	0	3.94727	81.7178		http://nonlinear.com/redirect/outbound?p=lipidmaps&param=LMGP03010973
PS(O-38:2) PS(P-38:1)	11.61_800.5848m/z		800.585	11.6071	79243.9	1.59	40844.1	48127.9	46640.1	44653.3	45670.3	52307.6	40846.2	47033.5	48251.5	44381.8	51205.8	67643.1	90201.1	79887.4	59321.6	52639.9	56140.9	44338.3	39414.5	36910.5	85039.2	75500.9	57799.1	34696.5	35317.7	43654.2	LMGP03020035	PS(O-38:2) PS(P-38:1)	M-H	C44H84NO9P	50.6	0	4.46658	87.4691	0.0196
PS(O-38:3) PS(P-38:2)a	9.70_798.5690m/z		798.569	9.69572	5726.59	1.2	1280.8	1404.92	1493.94	1864.03	1895.92	4707.28	4271.74	3816.46	2569.55	2761.68	2453.24	5437.06	6030.33	5712.36	461.938	405.713	198.2	293.202	312.979	456.98	85039.2	4273.23	4001.57	91.1556	245.156	320.436	LMGP03020055	PS(O-38:3) PS(P-38:2)a	M-H	C44H82NO9P	35.6	0	4.46094	82.9378		http://nonlinear.com/redirect/outbound?p=lipidmaps&param=LMGP03020055
PS(O-38:3) PS(P-38:2)b	11.10_798.5691m/z		798.569	11.0983	53466.9	0.17	31069.8	36269.7	34142	31948.5	31871.7	25725.7	18909.9	20685	55097.1	51992.6	53311.1	37092.4	45504.4	37757.5	46679.9	40312.8	38963.4	37732.5	33791.6	30317.5	85039.2	46645.4	37375.8	35853.9	36982.8	42534.3	LMGP03030026	PS(O-38:3) PS(P-38:2)b	M-H	C44H82NO9P	44.2	0	2.80777	69.4975	0.037
PS(O-38:3) PS(P-38:4)	11.19_794.5356m/z		794.536	11.1945	7136.18	0.89	3336.83	3439.31	3585.93	2983.93	2946.59	1077.6	1029.09	836.378	4753.65	4995.51	4412.51	2716.68	3241.39	2249.79	3539.44	2450.98	2674.07	2347.54	2125.37	1884.94	85039.2	3007.51	2794.59	6343.09	7189.94	7875.52	LMGP03030027	PS(O-38:3) PS(P-38:4)	M-H	C44H78NO9P	54.6	0	2.67427	84.7275	-0.0043
PS(O-38:4) PS(P-38:3)	11.62_796.5513m/z		796.551	11.6208	2704.25	8.19	1654.1	1419.55	1248.65	1722.41	1384.96	1061.52	616.384	750.016	2960.03	2581.95	2570.76	2248.42	2599.19	1835.14	1730.35	1304.72	1623.35	495.505	407.652	383.058	85039.2	2480.04	2422.71	837.002	1224.28	1113.06	LMGP03020056	PS(O-38:4) PS(P-38:3)	M-H	C44H80NO9P	35.1	0	1.88517	77.9825		http://nonlinear.com/redirect/outbound?p=lipidmaps&param=LMGP03020056
PS(O-38:4) PS(P-38:5)	9.15_796.5535m/z		796.554	9.14568	9331.85	1.63	3928.49	3627.09	3716.68	3954.33	4317.15	2100.02	1794.09	1646.9	3788.27	4251.14	3907.07	8091.93	8211.38	7948.74	973.49	980.121	880.654	9704.79	8918.63	9372.14	85039.2	4534.83	4752.21	3967.61	4184.16	4121.68	LMGP03020056	PS(O-38:4) PS(P-38:5)	M-H	C44H80NO9P	36.2	0	4.69363	86.3655		http://nonlinear.com/redirect/outbound?p=lipidmaps&param=LMGP03020056
PS(O-38:5) PS(P-38:4)	10.14_794.5383m/z		794.538	10.1358	49270.3	0.68	9923.61	13469.6	12780.8	11219.3	11112.7	55851	40619.5	51340.4	46354.8	40639.2	44823.9	7784.26	10628.5	9539.47	3634.48	2888.88	3306.34	2203.18	1947.67	1902.31	85039.2	10005.3	6749.98	1581.65	1464.75	2035.49	LMGP03030072	PS(O-38:5) PS(P-38:4)	M-H	C44H78NO9P	48.3	0	3.26444	92.9338	0.0372
PS(O-38:6) PS(P-38:5)	9.63_792.5225m/z		792.523	9.62697	36454.8	0.98	12509.1	14922.3	14781.1	12306.3	12478.8	16629.9	11218.3	12410.3	39093.4	32748.6	37522.5	12825.3	15239	13162.1	4829.49	4102.43	4706.62	17301.5	15667.9	14830.4	85039.2	10770.9	8788.8	19347.6	20506.9	26319.9	LMGP03030050	PS(O-38:6) PS(P-38:5)	M-H	C44H76NO9P	51.6	0	4.97202	93.4499	0.0166333
PS(O-40:3) PS(P-40:2)a	10.42_826.6007m/z		826.601	10.4245	20782.3	4.09	3684.02	3160.38	2912.5	4514.34	4055.97	20255.6	20329	21762.3	5394.11	4416.8	3817.93	4753.86	5079.04	5262.7	259.296	162.718	132.779	350.284	249.849	328.238	85039.2	6480.46	5552.8	162.859	163.083	242.374	LMGP03020062	PS(O-40:3) PS(P-40:2)a	M-H	C46H86NO9P	39.8	0	2.58989	89.1802	-0.2929
PS(O-40:3) PS(P-40:2)b	11.70_826.6007m/z		826.601	11.7033	242750	0.64	154836	180848	177952	159829	161284	206142	166375	205671	236925	220931	245431	204880	281009	242362	150554	125785	160076	157744	145955	127563	85039.2	226926	164016	196969	192902	226606	LMGP03020062	PS(O-40:3) PS(P-40:2)b	M-H	C46H86NO9P	48.2	0	2.85147	95.778	0.0506
PS(O-40:4) PS(P-40:3)a	9.89_824.5851m/z		824.585	9.88823	28720	1.07	15045.7	14139.8	13635	14315.2	14955.2	17633.3	18039.1	17188.6	32401.4	27521.6	26236.9	22183.3	22023.4	22490.3	6229.54	5306.83	5467.88	16167.3	14864.4	15047.7	85039.2	21260.6	20767.6	16634	16427.6	17275.7	LMGP03020040	PS(O-40:4) PS(P-40:3)a	M-H	C46H84NO9P	37.1	0	4.80343	91.0544		http://nonlinear.com/redirect/outbound?p=lipidmaps&param=LMGP03020040
PS(O-40:4) PS(P-40:3)b	11.18_825.5923n	825.592	824.585	11.1808	29396.5	1.23	16533	19888.4	19751.3	17666.3	17975.5	10622.5	8337.72	9830.8	29635.5	27782.4	30771.6	22859.3	31643.3	27474.6	18486	13725.8	16603.1	21545.4	20744.3	18234.3	85039.2	23431.3	17847.5	23298.3	26595.6	31186.8	LMGP03020040	PS(O-40:4) PS(P-40:3)b	M-H, M+Na-2H	C46H84NO9P	37.2	0	4.72685	91.3055		http://nonlinear.com/redirect/outbound?p=lipidmaps&param=LMGP03020040
PS(O-40:4) PS(P-40:3)c	12.49_824.5826m/z		824.583	12.4871	22459.4	0.21	12522.8	13300.1	12624.3	12942.7	12981.2	9789.84	8530.68	7647.36	8967.02	8632.46	10374.5	21419.9	25721.3	20237.1	20360.7	19969.5	20161.4	10525.1	9787.22	9479.65	85039.2	21413.3	19712.7	8562.37	9880.83	10346.7	LMGP03020063	PS(O-40:4) PS(P-40:3)c	M-H	C46H84NO9P	36.7	0	1.83601	85.8038		http://nonlinear.com/redirect/outbound?p=lipidmaps&param=LMGP03020063
PS(O-40:5) PS(P-40:4)a	9.56_822.5693m/z		822.569	9.55822	30058.9	1.27	10053	9352.61	9355.06	11440.5	11178.2	4281.12	2881.62	2608.84	4514.12	4652.6	5105.46	30159.8	31748.7	28268.2	7399.46	5534.25	4615.34	19307	19337.8	18519.3	85039.2	18602.2	18392.4	8651.27	8864.71	9402.19	LMGP03020064	PS(O-40:5) PS(P-40:4)a	M-H	C46H82NO9P	36.8	0	4.65302	89.5025		http://nonlinear.com/redirect/outbound?p=lipidmaps&param=LMGP03020064
PS(O-40:5) PS(P-40:4)b	10.23_820.5536m/z		820.554	10.232	18239	1.7	10642.1	13139.7	12987.7	10810.8	11074.3	13967.8	11971.6	13167.4	18452.2	16724.3	17738	10848.2	13368.2	11702.6	8840.06	6726.75	7484.06	18127.8	16506.2	16143.7	85039.2	11670	9673.08	17017.7	16881.8	20817.4	LMGP03030080	PS(O-40:5) PS(P-40:4)b	M-H	C46H80NO9P	52.3	0	4.6835	93.0584	0.0149
PS(O-40:5) PS(P-40:4)c	10.75_822.5694m/z		822.569	10.7545	45654.9	2.71	10080.7	13231.1	12540.3	10851.8	11276.1	44095.6	42710.6	50158.4	22870.8	21389.1	20708.6	8102.22	11505.7	9918.26	11798.8	8687.7	9299.61	4694.69	4025.26	4001.09	85039.2	13193.4	9794.34	3036.45	3080.97	4121.76	LMGP03020064	PS(O-40:5) PS(P-40:4)c	M-H	C46H82NO9P	36.2	0	4.84524	86.4146		http://nonlinear.com/redirect/outbound?p=lipidmaps&param=LMGP03020064
PS(O-40:5) PS(P-40:4)d	11.98_822.5669m/z		822.567	11.9783	72309.5	0.09	50852.6	50931	49962.8	45357.6	45298.6	43382.4	41530.1	42671.9	74489.1	68608.7	73830.6	64565	75117.6	55430.8	52143.9	50951.3	58945.6	45613.8	43920.1	36033.1	85039.2	56647	47773.6	50927.3	51277.1	55440.9	LMGP03030055	PS(O-40:5) PS(P-40:4)d	M-H	C46H82NO9P	52.4	0	2.6483	92.4265	-0.0182
PS(O-40:7) PS(P-40:6)a	10.00_819.5453n	819.545	818.538	9.99823	85969.9	1.57	46586	54871.2	52270.5	45056.3	46068.1	30153.7	20222.9	23275.5	25503.3	25089.7	28152.1	43708	54109	45136.5	81468	63692.5	69535.2	79068.9	72637.3	65257.4	85039.2	45558.6	36161.2	74830.7	83373.4	99705.7	LMGP03030089	PS(O-40:7) PS(P-40:6)a	M-H, M+Na-2H	C46H78NO9P	37.7	0	4.7534	94.1036		http://nonlinear.com/redirect/outbound?p=lipidmaps&param=LMGP03030089
PS(O-40:7) PS(P-40:6)b	11.03_818.5357m/z		818.536	11.0295	45164.3	0.77	13384.6	14095.7	13546.7	12058.2	11927.7	43107	44757.9	47628	34115.4	31424.2	34839.9	11523.6	13498.9	10952.4	4003.63	3472.68	4576.72	4116.41	3534.25	2701.81	85039.2	9953.13	7693.72	2521.38	2558.05	3143.9	LMGP03030089	PS(O-40:7) PS(P-40:6)b	M-H	C46H78NO9P	37.4	0	1.9029	89.4578		http://nonlinear.com/redirect/outbound?p=lipidmaps&param=LMGP03030089
PS(O-40:8) PS(P-40:7)	10.49_816.5200m/z		816.52	10.4933	38965.8	0.14	20372	22708.5	21709.5	17823.4	17857.7	20552	20140.9	22681.2	41185	35077	40635.5	21281.8	24014.9	17216.8	6652.84	7547.39	9531.28	28154.7	24564.8	20206.9	85039.2	13294.4	11168.5	29922.4	28595.8	32603.9	PS(O-40:8)PS(P-40:7)	PS(O-40:8) PS(P-40:7)	M-H	C46H77NO9P	40.9	0	2.03016	85.4176	-0.1567
PS(O-42:3) PS(P-42:2)a	12.38_854.6318m/z		854.632	12.3771	9927.87	0.08	5120.36	6332.17	5849.02	5749.96	5756.2	7018.37	5867.89	7257.3	5471.73	5007.62	6767.41	8132.55	11460.4	10190.6	4123.1	3193.52	3863.56	7457.47	6810.03	7095.36	85039.2	9775.37	6827.58	5593.66	5775.99	7292.88	LMGP03030084	PS(O-42:3) PS(P-42:2)a	M-H	C48H90NO9P	37	0	4.41305	90.3647		http://nonlinear.com/redirect/outbound?p=lipidmaps&param=LMGP03030084
PS(O-42:3) PS(P-42:2)b	10.41_850.6004m/z		850.6	10.4108	33452.4	0.72	17143.9	15521.8	14678.7	17332.2	17157.5	14830.1	12871.7	11772.3	10684.9	9834.92	8854.74	32918.2	32584.4	29194.5	24644.9	20292.6	20119.4	16913.7	16890.6	16574.5	85039.2	35706.1	32372.1	10480	9365.88	9959.29	LMGP03030085	PS(O-42:3) PS(P-42:2)b	M-H	C48H86NO9P	42.6	0	3.13197	93.2024	-0.1416
PS(O-42:4) PS(P-42:3)	11.81_852.6161m/z		852.616	11.8133	8651.28	1.83	3307.17	3820.7	3628.43	4105.84	3939.72	4660.87	3741.54	3960.43	3486.92	3543.55	3616.23	5309.9	7585.84	6127.18	2696.23	2066.22	2087.9	2804.92	2701.78	2708.68	85039.2	9516.06	7277.97	2948.67	3337.68	3695.68	LMGP03020068	PS(O-42:4) PS(P-42:3)	M-H	C48H88NO9P	47.9	0	4.60506	85.6749	0.0333
PS(O-42:5) PS(P-42:4)	11.52_850.6004m/z		850.6	11.5246	3390.2	3.27	1386.92	1803.86	1461.63	1945.75	1696.55	3140.5	3214.75	3815.35	3492.69	3047.81	3545.9	2029.15	3263.79	2913.48	769.036	411.11	456.806	1358.76	1289.67	1371	85039.2	1984.77	1500.33	1351.49	1487.88	1976.22	LMGP03030085	PS(O-42:5) PS(P-42:4)	M-H	C48H86NO9P	39.9	0	4.52568	82.3059	0.1607
PS(O-42:6) PS(P-42:5)a	11.06_848.5851m/z		848.585	11.057	3777.45	1.39	1271.84	1667.94	1452.54	1436.85	1408.91	2616.49	2208.05	2437.2	1133.38	1060.09	974.138	851.847	1665.55	1706.36	4469.12	3213.18	3650.06	740.863	541.083	566.675	85039.2	2796.03	1955.5	313.076	464.961	770.494	LMGP03020093	PS(O-42:6) PS(P-42:5)a	M-H	C48H84NO9P	35.3	0	4.6772	81.8391		http://nonlinear.com/redirect/outbound?p=lipidmaps&param=LMGP03020093
PS(O-42:6) PS(P-42:5)b	11.70_849.5896n	849.59	848.582	11.7033	34435.5	0.57	22438.2	25978.2	25907.4	23890.8	23700	27965.8	22762.4	29658.1	34246.2	30681.8	35022.5	30388.9	41325.9	31591.8	20267.5	17902.8	22506.3	23638.1	22117.7	18989.6	85039.2	33264.2	24448	28779.5	27734.1	31424.2	LMGP03020093	PS(O-42:6) PS(P-42:5)b	M-H, M+Cl, M+FA-H	C48H84NO9P	37.7	0	1.44731	90.2007		http://nonlinear.com/redirect/outbound?p=lipidmaps&param=LMGP03020093
PS(O-42:6) PS(P-42:5)c	12.06_848.5824m/z		848.582	12.0608	21057.3	1.35	15618.5	17132.8	16443.4	14117	15063.1	9975.11	9959.04	9302.99	15865.3	15115.8	16925.9	20938.5	24154.4	18079.1	15236.1	15288.4	14909.7	18930.6	17667.6	14315.4	85039.2	19769.8	18060	20484.2	19674.3	21389.2	LMGP03020093	PS(O-42:6) PS(P-42:5)c	M-H	C48H84NO9P	37.9	0	1.49586	91.2923		http://nonlinear.com/redirect/outbound?p=lipidmaps&param=LMGP03020093
PS(O-42:6) PS(P-42:7)	9.89_848.5847m/z		848.585	9.88823	8981.82	1.12	2116.25	1641.61	1745.71	2461.52	2565.38	376.298	64.0611	42.8978	198.941	263.341	143.72	5251.09	5585.22	5642.26	1419.76	1754.58	1210.93	2030.38	2192.54	2146.07	85039.2	9080.99	8879.93	600.487	901.014	1272.68	LMGP03020093	PS(O-42:6) PS(P-42:7)	M-H	C48H84NO9P	35.5	0	4.27787	82.5192		http://nonlinear.com/redirect/outbound?p=lipidmaps&param=LMGP03020093
PS(O-42:7) PS(P-42:6)a	10.56_846.5681m/z		846.568	10.562	4906.65	4.66	1531.92	2221.3	2017.16	1973.43	1847.48	1936.57	1398.54	1263.78	939.57	1311.78	1122.31	1269.27	1730.96	1910.53	6390.09	4465.74	3864.11	3365.94	2889.87	2670.86	85039.2	2478.71	2328.67	1805	2097.06	2744.95	LMGP03030093	PS(O-42:7) PS(P-42:6)a	M-H	C48H82NO9P	49.1	0	4.26424	82.9293	0.0208
PS(O-42:7) PS(P-42:6)b	11.62_846.5668m/z		846.567	11.6208	16446	4.92	4772.44	5559.51	4850.07	4127.86	4425.13	12850.7	18567.3	17919.8	6922.84	5884.48	6627.13	3371.49	4024.95	3024.46	4504.76	4169.55	4814.08	3009.92	2529.66	2320.49	85039.2	3385.49	2877.98	2303.14	2149.5	2720.09	PS(O-42:7)PS(P-42:6)	PS(O-42:7) PS(P-42:6)b	M-H	C48H83NO9P	41.7	0	1.70289	83.7012	-0.1292
PS(O-42:8) PS(P-42:7)a	11.11_844.5511m/z		844.551	11.112	10127.5	2.1	4709.49	5002.13	4553.89	4686.16	4549	9634.65	10602	10145.8	6682.78	5851.91	6383.12	4714.68	5694.85	3844.39	2058.37	2115.23	2288.42	6240.2	5127.37	4744.32	85039.2	4872.62	4474.77	4545.42	4518.19	5178.8	PS(O-42:8)PS(P-42:7)	PS(O-42:8) PS(P-42:7)a	M-H	C48H81NO9P	42.8	0	1.70414	86.4083	-0.108
PS(O-42:8) PS(P-42:7)b	11.40_844.5511m/z		844.551	11.4008	15506.3	1.92	5230.68	5836.57	5433.47	4522.32	4646.64	7021.35	6921.81	6679.11	1339.82	1550.01	1416.23	2744.57	3453.47	2949.28	14855.3	14956.2	16707.4	2545.15	2291.62	1797.29	85039.2	6123.5	4862.02	1425.53	1364.44	1625.29	PS(O-42:8)PS(P-42:7)	PS(O-42:8) PS(P-42:7)b	M-H	C48H81NO9P	55.3	0	2.80377	88.0306	-0.0043
PS(O-42:9) PS(P-42:8)a	10.59_842.5354m/z		842.535	10.5895	6666.59	0.8	5089.89	6012.68	5424.42	5228.92	5027.23	5480.03	4699.37	5525.27	3652.64	3597.36	3609.55	5291.94	6445.49	5090.76	6705.68	5821.65	6563.8	7090.81	6506.04	5661.87	85039.2	7210.43	6027.58	5824.08	5652.41	6584.15	PS(O-42:9)PS(P-42:8)	PS(O-42:9) PS(P-42:8)a	M-H	C48H79NO9P	42.6	0	1.73304	86.5468	-0.1105
PS(O-42:9) PS(P-42:8)b	10.88_842.5355m/z		842.535	10.8783	21760.4	1.02	14130	14665.9	14337.9	11557.4	11392.4	5715.94	5553.06	4919.63	4065.19	3860.98	4584.84	8190.38	8286.37	7137.23	19711.2	21711.4	23858.5	23024.8	20477.6	16737.5	85039.2	7283.07	6583.02	19398.4	20251.7	21486.3	PS(O-42:9)PS(P-42:8)	PS(O-42:9) PS(P-42:8)b	M-H	C48H79NO9P	51.7	0	2.72097	90.6354	-0.0179
Unk.1	3.26_502.3194m/z		502.319	3.26062	25551.3	0.96	14713	12448.4	12842.8	13068.4	13247.9	18875.8	16562.5	12304.7	20417.6	20787.2	19721.4	25852.6	27251.1	23550.3	12229	9464.42	10790.1	11995	11021.7	13231.9	85039.2	19395.8	21146.5	8397.23	7647.99	7167.1		Unk.1
Unk.2	4.80_592.2951m/z		592.295	4.80063	6528.01	2.18	4401.37	4859.67	4885	3858.34	3500.34	5533.21	4902.23	5482.87	5507.94	5778.33	5235.51	1357.71	1727.23	2119.7	3999.94	4235.44	4975.62	3787.38	3733.11	3206.19	85039.2	2211.85	1943.29	6415.71	6479.86	6688.45		Unk.2
Unk.3	4.80_1035.6679m/z		1035.67	4.80063	10308.3	4.83	3385.34	4764.06	4049.61	5426.04	5067.99	11766.4	5538.54	2721.49	4232.7	5753.73	3840.37	172.918	41.1383	854.752	6489.81	4963.6	4874.49	1735.8	1783.43	2347.17	85039.2	614.57	852.419	6831.28	12291.2	11802.4		Unk.3
Unk.4	4.80_608.3208m/z		608.321	4.80063	3735.7	0.9	2374.16	2685.71	2851.28	2220.67	1973.46	2946.77	2775.11	2924.02	3074.1	3235.61	3079.65	900.234	824.026	1141.53	2312.16	2382.97	3241.04	2080.28	2234.05	1891.69	85039.2	1164.16	1112.16	3698.02	3763.17	3745.93		Unk.4
Unk.5	4.80_1087.6292m/z		1087.63	4.80063	3552.08	8.69	1211.18	1781.39	1533.36	1896.45	1676.82	3734.81	1742.64	600.4	1594.43	2141.11	1550.15	52.6476	0	204.787	2121.53	1594.5	1854.45	769.556	629.355	900.115	85039.2	142.069	225.243	2255.24	4336.41	4064.6		Unk.5
Unk.6	6.88_1020.5173n	1020.52	1019.51	6.87688	97676.6	1.99	46694.4	57107.2	53128.2	46003.9	43404.7	52231.3	28949.3	29249	35923.2	40496.5	26874.6	47555.2	46027.5	47729.5	33407.9	38085.8	32654.5	64062.5	54273.1	57262.6	85039.2	35856.5	32507.6	83416	88901.8	120712		Unk.6	M-H, M+Na-2H
Unk.7	7.25_590.4485m/z		590.448	7.24813	2314.71	4.31	908.815	766.584	812.234	1020.23	959.875	1622.44	1885.91	2629.64	1023.32	1016.64	547.92	1559.64	1797.31	1520.79	1634.58	846.359	774.492	224.917	94.585	295.472	85039.2	2622.61	2089.57	185.903	259.673	353.177		Unk.7
Unk.8	7.76_616.4641m/z		616.464	7.75688	16287.8	5.62	4704.41	4340.36	4228.86	4964.82	5454.45	17037.4	8852.6	22973.4	5323.86	4043.28	3355.79	7466.87	5862.27	6227.42	8199.96	3354.66	3810.11	30.979	30.4086	65.4592	85039.2	11297.3	14071	20.9333	6.80028	24.925		Unk.8
Unk.9	7.95_764.5125m/z		764.512	7.94938	15670.6	1.46	7696.03	8263.73	8303.4	8914.61	8732.22	10126.5	7527.1	8308.82	8411.5	6782.58	7664.44	13423.8	12143.4	13420.4	3665.77	5328.03	6882.53	10791.5	11426.2	12017.3	85039.2	14667.3	16305.9	8054.41	7018.77	5584.03		Unk.9
Unk.10	7.95_820.4810n	820.481	841.455	7.94938	24527.3	2.79	12195.8	12840.1	12292.3	10653.6	9911.76	22622.9	6543.31	10599.7	10187.6	6601.45	8977.46	3693.17	2206.01	2835.22	9419.02	6581.55	8080.94	18859	17505.5	20423.2	85039.2	2925.65	2358.83	22205.1	23319.1	28057.7		Unk.10	M-H, M+Na-2H
Unk.11	7.95_820.4233m/z		820.423	7.94938	5739.93	6.21	2474.97	2943.37	2936.26	1903.61	2520.77	5137.84	1058.5	2061.01	2384.42	1366.45	1898.36	672.113	342.987	591.155	2180.78	1318.99	1618.24	4596.84	4401.76	4971.19	85039.2	500.543	484.816	5380.09	5437.54	6402.17		Unk.11
Unk.12	7.98_561.4580m/z		561.458	7.97688	36740.6	5.51	4820.67	4130.48	4103.92	3913.41	4230.84	99.1669	736.239	1643.48	35194.7	30021.8	45005.3	3938.55	4839.21	5267.67	98.666	80.2928	50.244	0	0	0	85039.2	3617.49	3928.93	21.894	0	0		Unk.12
Unk.13	8.11_618.4798m/z		618.48	8.1144	6495.82	4.14	2081.8	2035.23	1910.87	2318.81	2458.51	6910.98	3889.36	8062.19	2234.36	1616.91	1484.86	3759.3	2944.52	3146.06	4279.07	1938.18	1856.78	63.3346	102.65	355.651	85039.2	5320.36	6752.63	59.5376	158.34	53.5859		Unk.13
Unk.14	8.11_625.4741m/z		625.474	8.1144	4483.58	0.88	1674.43	1667.37	1607.66	1751.44	1773.25	436.933	327.105	225.461	652.027	833.572	696.869	1681.19	1904.82	1785.17	4896.39	4258.5	4295.85	982.143	881.77	911.559	85039.2	2955.93	3243.19	1474.41	1333.3	1658.98		Unk.14
Unk.15	8.32_790.5279m/z		790.528	8.32067	33043.3	1.1	10869.8	11621.5	12286.4	15128.3	15365.4	53784.2	18039.1	27306.6	7357.54	7923.56	6871.41	27406.7	28987	31131.1	1512.71	4506.9	5367.08	17239.2	16718.4	19902.4	85039.2	22871.8	24513.3	8151.85	8107.53	6968.16		Unk.15
Unk.16	8.33_874.4949m/z		874.495	8.33442	3026.22	4.53	797.569	729.061	878.059	1016.97	953.813	1383.21	2441.03	2028.78	2835.06	2520.29	2698.6	683.665	350.102	490.384	410.394	405.312	259.274	3202.36	3196.63	2679.68	85039.2	378.77	516.769	690.692	526.278	653.318		Unk.16
Unk.17	8.38_736.4474n	736.447	735.44	8.37567	9348.4	1.27	6492.94	6212.54	6133.7	5409.51	5217.9	6296.06	10980.7	10768.5	9681.15	9194.07	9031.52	3149.73	3180.75	2870.15	4789.73	5330.86	5074.8	4752.59	4509.36	3897.11	85039.2	3585.7	3676.86	8412.62	8075.77	8183.27		Unk.17	M-H, M+Na-2H
Unk.18	8.38_1232.9928n	1232.99	1231.99	8.37567	14783.1	6.64	5358.2	6119.63	5798.18	6604.48	5630.97	10483.5	22223.4	11341.3	10694.7	12759.5	11132.4	613.528	322.751	2014.41	10275.1	7766.15	3573.19	2713.61	2410.71	3640.99	85039.2	1406.48	2871.47	9772.65	16895.1	17681.4		Unk.18	M-H, M+Na-2H
Unk.19	8.38_846.5156m/z		846.516	8.37567	4959.76	2.11	2700.41	2762.86	2816.96	2888.69	3006.52	3057.15	1915.33	2124.34	4933.7	4476.24	5469.34	4666.33	5082.77	4651.97	2361.92	2593.09	3725.17	3653.9	3677.21	3802.2	85039.2	5112.93	4766.16	2159.84	1369.07	1239.13		Unk.19
Unk.20	8.38_877.5026n	877.503	876.495	8.37567	8145.27	1.93	4242.4	4631.93	4690.93	4847.44	4659.19	4759.45	2605.97	3717.84	7654.54	7417.03	8905.79	8185.96	8278.53	7971.33	2551.27	3094.08	4909.91	5154.22	5232.18	5542.4	85039.2	7872.67	8250.42	3085.05	2615.2	1719.55		Unk.20	M-H, M+Na-2H
Unk.21	8.43_711.5319n	711.532	710.525	8.43067	16794.4	0.33	4898.42	4867.52	4548.44	3980.88	3962.39	2127.11	1584.78	1171.1	4213.47	4300.4	3606.01	3963.12	3876.8	4069.18	14961.9	16216.1	19205.3	1658.65	1572.46	1621.61	85039.2	4460.47	4445.62	2844.15	2716.6	2841.66		Unk.21	M-H, M+FA-H
Unk.22	8.54_1399.9484m/z		1399.95	8.54067	12446.4	4.61	2889.3	3173.95	3023.21	3348.85	2661.07	1030.2	402.696	0	760.214	1044.22	1236	1827.31	1825.49	2959.32	12529.2	12974.1	11835.8	1648.9	1384.65	2305.23	85039.2	3200.74	3554.42	1907.13	3241.09	2935.19		Unk.22
Unk.23	8.55_1280.9929n	1280.99	1279.99	8.5544	91818.1	9.31	11719.4	13892	12059.9	14718.2	12826	6553.69	4544.14	2302.3	8735.08	12278.7	10592.4	3146.91	2934.55	8075.39	128613	86445.3	60395.8	4788.2	4636.79	8079.9	85039.2	9041.19	13054.6	10678.7	17249.5	18956.6		Unk.23	M-H, M+Na-2H
Unk.24	8.55_1311.0034n	1311	1310	8.5544	119344	9.89	21451.6	27080.6	23709.9	33696.2	29291.6	17024.9	12080.5	6812.71	20458.6	26584	22400	22493.5	21224.8	39109.9	150682	116780	90568.9	15998.9	16017.9	22809.5	85039.2	32909.2	39994.7	19917.1	28586.6	30841.3		Unk.24	M-H, M+Na-2H
Unk.25	8.55_1430.9563n	1430.96	1429.95	8.5544	18767.6	8.98	5792.03	8100.07	6300.18	9503.9	8021.25	4241.69	2964.78	756.845	5145.18	6428.41	5987.91	8178	8647.29	11840	16936.4	19114.8	20251.6	5033.01	4195.88	5896.52	85039.2	10720.6	11597.1	5369.47	7534	7682.33		Unk.25	M-H, M+Na-2H
Unk.26	8.58_1417.0229m/z		1417.02	8.5819	20396.4	2.83	1616.12	1588.5	1528.75	2115.57	1736.65	594.447	494.164	118.789	97.9946	217.428	131.686	38.7936	58.1473	134.893	27337.9	19580.3	14271.1	1803.08	1527.34	2936.29	85039.2	339.287	710.083	1229.72	1519.61	2006.88		Unk.26
Unk.27	8.60_874.4948m/z		874.495	8.59565	7928.39	2.34	2496.9	2179.29	2154.07	2131.96	2046.09	668.275	589.104	532.995	0	6.72079	0	1043.91	847.562	819.482	8045.86	7714.49	8024.82	3837.04	3924.93	3554.23	85039.2	1256.68	1169.07	1313.13	1205.35	1330.76		Unk.27
Unk.28	8.60_890.5206m/z		890.521	8.59565	6607.33	2.14	2000.24	1696.59	1573.09	1854	1650.05	685.76	324.1	593.328	75.6007	148.271	53.1918	1200.27	911.116	917.537	6444.87	6703.93	6673.19	3090.63	3157.45	2690	85039.2	1202.49	1123.77	1104.7	902.77	902.806		Unk.28
Unk.29	8.62_1285.0235n	1285.02	1284.02	8.62315	61894.6	7.52	4061.21	5566.14	5322.68	6019.71	5346.49	16049.2	51473.8	20621.1	60665.5	67037.8	57980.5	0	0	94.8268	405.448	179.831	94.6407	768.047	685.522	1493.11	85039.2	575.225	2335.14	6327.99	10913.7	11571.3		Unk.29	M-H, M+Na-2H
Unk.30	8.65_993.5506m/z		993.551	8.65067	65802.9	4.94	8270.8	7825.86	7041.86	6063.17	6501.83	323.546	51.5732	0	1625.84	1971.31	732.313	2040.12	213.004	1269.01	120790	50753.1	25865.5	0	0	0	85039.2	1062.72	1295.5	0	0	0		Unk.30
Unk.31	8.71_737.5244n	737.524	782.538	8.70567	26703	0.55	9508.29	9274.61	8867.86	9901.16	9978.05	4837.65	5068.46	4580.72	8809.32	9401.05	8385.4	17246.4	16488.6	15891.9	7271.74	4644.93	4095.02	28309.8	25855.9	25943.4	85039.2	7055.39	7950.94	11186.9	10626.9	11138.1		Unk.31	M-H, M+FA-H
Unk.32	8.76_787.5362m/z		787.536	8.76067	7790.28	0.11	2345.75	2482.06	2560.76	3361.23	3356.21	3186.44	1868.74	1639.24	1220.72	1674.24	1338.01	4327.14	3290.15	7436.15	9978.82	7576.57	5815.44	4490.76	4369.6	5958.49	85039.2	5029.83	6887.74	2584.36	2806.17	3534.4		Unk.32
Unk.33	8.77_919.5502m/z		919.55	8.77442	13222.9	5.42	1506.43	1662	1525.61	1036.49	1383.59	0	0	0	38.1246	185.782	22.2141	71.2966	0.662911	119.447	18989.3	11959.6	8719.78	0	0.160209	13.3552	85039.2	119.421	22.8179	0	0.0426742	0		Unk.33
Unk.34	8.86_1019.5664m/z		1019.57	8.85692	141972	6.82	16226.2	18729.9	17925.4	16698.9	18391.7	1900.04	34.0389	320.268	2056.35	2502.48	722.379	6963.42	1582.6	4976.76	261995	113221	50699.3	1.5222	5.00427	2.6578	85039.2	4143.67	5246.12	0	0.680982	3.32231		Unk.34
Unk.35	8.86_993.5504m/z		993.55	8.85692	75224.8	3.18	6085.62	7742.84	7638.12	9064.05	9481.58	1749.85	248.537	523.465	1451.8	1959.79	689.845	6091.12	1225.6	3740.97	136505	60290.2	28879.4	0	40.7538	0	85039.2	4352.81	5872.23	0	0	0		Unk.35
Unk.36	8.86_1035.5614m/z		1035.56	8.85692	39044.6	0.1	3310.3	3516.67	3770.41	4406.6	4412.66	197.313	0	146.871	328.551	810.967	177.733	1878.79	219.099	1223.57	73206	30188.6	13739.2	0	0	0	85039.2	1387.47	1474.37	0	0	0		Unk.36
Unk.37	8.87_676.4955n	676.495	721.494	8.87067	31204.8	0.07	19172.8	20262.2	19371	19456.5	19437.1	11270.7	9628.6	10463.5	16402	16325.3	16091.5	31089.3	34595.6	27929.6	27594	26929.4	25607.5	24142.6	23645.4	21914	85039.2	30023.7	26429.8	19429.2	18693	20265.3		Unk.37	M+Cl, M+FA-H
Unk.38	8.87_774.4629n	774.463	773.456	8.87067	25383.4	0.55	16974.4	16525.6	15612.7	15238	15356.3	7099.16	7237.26	9136.45	13163.8	13709.1	13288	25869.9	29992.7	20287.5	18139.8	21189.8	21997.9	19073.9	18583.3	15037.4	85039.2	24503.4	20788.6	16426	14410.4	14848		Unk.38	M-H, M+Na-2H
Unk.39	8.87_1428.9743n	1428.97	1427.97	8.87067	29922	3.78	12369.4	14615.9	12479.9	18513.2	16716.5	6411.28	4467.89	3634.03	7131.04	8078.38	6959.41	24816	29117.3	35069.4	34148.6	30966.3	22941.8	17830.7	18642.4	20568.7	85039.2	30768.6	28636	11256.4	15525.9	18439		Unk.39	M-H, M+Na-2H
Unk.40	8.87_687.4667m/z		687.467	8.87067	5582.08	2.86	1836.21	1819.95	1739.99	2336.66	2086.66	887.719	851.85	662.711	1535.43	1708.45	1679.8	3057.03	2756.43	3857.34	37.4833	64.0831	53.9576	5190.24	5237.32	6318.68	85039.2	1783.45	2208.97	2876.72	3174.83	3375.03		Unk.40
Unk.41	8.87_753.4352n	753.435	798.433	8.87067	7973.15	2.96	4016.76	4612.38	4373.81	3813.95	4827.8	2078.31	1435.96	1772.05	3504.55	3702.8	3674.35	7627.58	8599.45	7692.42	6543.39	6535.88	6161.96	6122.38	5567.2	5470.6	85039.2	7743.04	7153.38	4175.89	4469.12	4750.41		Unk.41	M-H, M+FA-H
Unk.42	8.88_1405.9844m/z		1405.98	8.88442	6488.4	6.3	2367.78	2551.81	2253.4	3016.85	2686.24	3285.27	3115.39	2267.8	771.18	1176.76	1220.32	4777.45	4446.09	7060.98	8644.42	6133.48	4687.3	2900.03	2891.26	4091.43	85039.2	5111.3	6211.62	1877.38	3266.8	3574.11		Unk.42
Unk.43	8.88_840.4406m/z		840.441	8.88442	3223.41	3.05	1349.52	1576.55	1856.92	1638.67	1843.61	1208.42	995.082	857.412	1224.93	1431.3	1206.69	3051.87	3278.89	3339.46	2635.21	2480.77	2580.41	2284.4	1941.11	2338.67	85039.2	2961.7	2911.24	1650.47	1998.02	1990.45		Unk.43
Unk.44	8.88_985.5603m/z		985.56	8.88442	26695.9	5.31	2390.54	3386.13	2877.31	3152.26	3398.03	284.732	82.6519	221.094	42.2356	113.385	119.01	292.795	0	575.689	34936.6	26737.4	18413.7	72.9499	115.416	93.8528	85039.2	333.094	112.68	15.0682	15.3718	0		Unk.44
Unk.45	8.90_1416.9744n	1416.97	1415.97	8.89817	15674.7	5	8398.67	10365.1	8860.79	12187.7	11355.3	19251.7	14518.3	13254.1	5350.26	6750.61	5743.7	9094.69	9569.98	12101.5	1165.12	900.298	706.911	8934.54	9318.83	12214	85039.2	8518.82	10446.3	8407.72	11947.5	12846.4		Unk.45	M-H, M+Na-2H
Unk.46	8.91_1027.5714m/z		1027.57	8.91192	26892.1	4.88	2568.08	2821.12	2638.03	2465.38	2866.63	0	0	0	0.895067	0	0	129.815	0	306.722	48760.2	22888.6	9027.54	0	0	0	85039.2	146.906	69.8871	0	0	0		Unk.46
Unk.47	8.99_1061.5769m/z		1061.58	8.99443	27264.4	3.09	2664.76	2508.88	2557.7	2513.83	2973.29	78.8709	0	0	213.947	143.538	0	537.758	0	278.271	50165.7	21210.8	10416.6	0	0	0	85039.2	152.305	202.901	0	0	0		Unk.47
Unk.48	9.04_1037.4699m/z		1037.47	9.03568	3596.63	2.56	1544.63	1125.96	1284.73	1165.68	1208.69	1242.76	1860.26	2042.73	3926.4	3233.71	3629.77	870.011	806.193	719.698	288.598	252.131	414.378	2722.34	2528.53	2282.31	85039.2	574.516	713.776	1794.67	1261.55	1416.77		Unk.48
Unk.49	9.05_972.4789m/z		972.479	9.04943	6476.62	0.96	3048.5	2806.68	2717.94	2730.14	2693.41	2712.52	4163.36	3588.15	6560	6208.14	6661.72	1807.99	1419.44	1272.67	1982.58	2566.43	2349.81	4992.41	5055.3	4377.12	85039.2	1423.76	1300.51	3676.21	3134.45	3135.64		Unk.49
Unk.50	9.05_1672.0833m/z		1672.08	9.04943	27574	1.67	5179.59	4903.04	4577.22	6842.67	5997.72	9043.43	10991.8	6173.28	27640.5	27084.5	27996.9	1123.87	1099.56	1848.01	666.004	330.605	277.628	20524.6	18184.6	24702	85039.2	855.973	1612.16	7085.76	8223.77	10621.6		Unk.50
Unk.51	9.05_1040.4655m/z		1040.47	9.04943	4068.98	5.19	1209.47	1472.22	1532.51	1557.89	1230.42	1425.01	2172.77	2016.77	4412.23	3795.66	3999.06	740.598	598.098	823.573	340.932	369.218	394.002	2776.99	2781.87	2181.99	85039.2	774.182	761.855	1893.1	1634.31	1574.09		Unk.51
Unk.52	9.05_1018.4424m/z		1018.44	9.04943	4919.98	4.08	2290.89	2126.91	2277.96	1825.86	1941.47	2047.97	3163.29	3421.52	5144.47	4557.62	5057.84	1565.76	1662.99	1049.04	474.571	842.37	1077.46	3151.6	3567.68	2233.34	85039.2	1251.67	1281	2924.15	1932.52	2012.21		Unk.52
Unk.53	9.05_966.4801m/z		966.48	9.04943	9255.98	0.15	4742.69	3703.74	3831.82	3288.66	3295.61	4002.9	5461.52	6227.89	9680.54	9015.85	9071.53	2607.75	3115.1	2032.68	1199.54	1477.73	1720.27	6770.09	6507.59	4535.78	85039.2	2204.11	1938.4	4667.55	3538.34	3936.9		Unk.53
Unk.54	9.05_909.5290n	909.529	944.498	9.04943	17286.8	1.76	6767.77	6456.93	7075.68	6551.18	6716.75	7084.32	11154.2	10396.4	19013.9	16355.3	16491.2	4707.47	4951.36	3949.5	2754.82	3009.47	3150.81	13487.4	12845.8	11530.6	85039.2	3572.72	3484.18	9095.24	7206.39	7770.31		Unk.54	M-H2O-H, M+Cl, M+FA-H
Unk.55	9.05_960.5236m/z		960.524	9.04943	13358.6	1.44	6160.99	5224.14	5337.96	5136.33	5032.82	5412.56	8042.22	7906.58	14325.8	12460.4	13289.5	3928.9	3531.53	2840.07	5127.34	3765.02	3790.19	10234.4	10396.1	7647.95	85039.2	3114.37	2707.7	6745.73	5457.63	5697.59		Unk.55
Unk.56	9.05_975.4848n	975.485	974.478	9.04943	23616.1	0.89	10349.9	9572.93	10322.7	9128.7	9015.11	9784.98	14724.8	15595.8	25395.8	21712.7	23739.9	7362.72	7312.76	5404.39	3188.18	3576.96	4620.94	18080.8	17279.2	12823	85039.2	6547.7	5305.02	12591.6	9623.92	10160.4		Unk.56	M-H, M+Na-2H
Unk.57	9.05_831.5353n	831.535	876.511	9.04943	49878.7	0.14	24673.3	21058.9	22389.1	21142.1	21101.4	23897.9	32928.3	31442	52851.2	48126.1	48658.7	15741.3	15377.6	12271.8	17785	20292.8	20723.1	40751.8	38475.3	34323.9	85039.2	12159.7	11996	26659.4	23082.1	24460.2		Unk.57	M+Na-2H, M+FA-H
Unk.58	9.05_779.5739n	779.574	824.548	9.04943	633014	1.23	306286	265328	271528	271031	275802	338353	433797	394396	647976	618127	632940	183048	169543	154529	283627	278046	263818	515750	497496	508422	85039.2	159125	158734	325195	292555	333975		Unk.58	M+Na-2H, M+FA-H
Unk.59	9.09_738.5562m/z		738.556	9.09068	11572.4	1.09	4756.46	4028.94	3792.84	4895.92	4821.04	2995.23	1753.81	1692.63	2808.84	3122.49	2999.21	11229.4	12217.8	11270.1	2553.37	2334.44	2693.69	7145.59	6402.88	7224.09	85039.2	8982.15	8696.28	3447.02	3397.72	3707.96		Unk.59
Unk.60	9.12_860.5156m/z		860.516	9.11818	4746.59	3.49	1746.92	1758.68	1579.79	1895.32	1794.34	377.871	315.294	0	552.914	589.918	590.475	5043.84	5351.15	3844.77	412.296	432.504	503.431	4429.73	4011.25	3448.22	85039.2	2167.69	1999.21	2067.24	1950.06	1944.53		Unk.60
Unk.61	9.13_802.4949m/z		802.495	9.13193	4685.63	2.12	2168.94	2552.46	2533.02	2299.29	2231.43	1232.07	1919.98	2064.46	1972.89	2534.73	2551.29	1866.62	2006.69	1782.37	5108.67	4466.94	4481.28	3168.31	3038.68	2684.09	85039.2	2051.44	1713.66	2913.33	2704.15	2969.41		Unk.61
Unk.62	9.15_729.5577n	729.558	750.532	9.14568	56411.6	1.5	21494.7	18938.8	18716.1	18171.9	18561.1	18375	19262.3	20034	12020.1	14233	12541.9	12712.5	11939.1	13218.9	63906.8	53915.5	51412.4	18074.9	19816.2	20425.3	85039.2	13299.5	13192.7	14857.4	14710.6	16684.5		Unk.62	M+Na-2H, M+FA-H
Unk.63	9.17_902.5268m/z		902.527	9.17318	11234.3	2.16	4785.79	4323.8	4485.22	4871.68	4724.91	5593.95	8486.3	7676.77	11962.5	10466.8	11273.7	5758.78	4166.14	3792.14	3048.64	2710.78	3176.12	7563	7245.31	5947.68	85039.2	5233.72	5964.55	4065.82	3303.59	4084.57		Unk.63
Unk.64	9.19_918.5521m/z		918.552	9.18693	10332.9	1.64	4038.47	3686.12	4100.6	4141.47	4046.32	4876.45	7931.04	6567.04	11132.8	9319.18	10546.6	4452.52	3825.79	3117.75	2479.24	2295.98	2561.89	6693.59	6554.52	5437.05	85039.2	4765.89	5008.9	3620.35	2861.29	3486.36		Unk.64
Unk.65	9.24_785.5637n	785.564	784.556	9.24193	27679.8	0.83	9507.63	9279.43	9835.7	12011.9	11872.2	15179.8	9557.8	10404.6	9546.91	10978.3	10947.6	28340.5	26854.6	27844.3	4107.28	3995.35	4558.25	11046.2	11059.5	14019	85039.2	18857.7	20698.2	11572.2	11522.3	12824.6		Unk.65	M-H, M+Na-2H
Unk.66	9.27_563.4935n	563.493	562.486	9.26943	21356.2	1.93	8321.63	9482.93	9574.11	8527.35	9295.83	6643.68	3404.73	2242.47	4126.74	4408.83	4259.85	7939.01	7312.36	8994.44	21493.1	21681.9	20893.7	10933.4	10443.8	11644.4	85039.2	8799.24	8023.04	9939.04	12025.2	14524.7		Unk.66	M-H, M+Cl, M+FA-H
Unk.67	9.28_742.4969n	742.497	763.471	9.28318	31626.3	0.11	11076.5	12169.8	12076.9	9598.52	9584.1	14266.4	21557.8	21111.1	31837.3	31742	31299.5	7892.92	6893.47	5777.88	5118.28	6326.8	6431.06	4787.32	4736.53	4205.07	85039.2	8921.26	9644.71	11771.2	11251	11592.4		Unk.67	M-H, M+Na-2H
Unk.68	9.28_1289.0554n	1289.06	1288.05	9.28318	57193	6.7	6747.76	8718.71	7926.66	9154.34	8326.68	21378.8	30174.3	16625.2	50494.4	61849.7	59235	1966.9	684.399	3203.26	3568.78	3313.52	1683.54	1384.28	954.62	1993.87	85039.2	2941.58	7387.87	7169.23	12894.9	13483.7		Unk.68	M-H, M+Na-2H
Unk.69	9.34_828.5107m/z		828.511	9.33818	7735.38	3.42	3380.31	3235	3580.94	3531.63	3365.03	5968.17	7966.51	8246.96	8170.95	7719.57	7315.62	2482.02	2076.16	2261.97	3396.83	3609.36	3794.91	4560.89	5311.47	4355.46	85039.2	2545.17	2711.98	2796.38	2420.09	2809.26		Unk.69
Unk.70	9.35_890.5266m/z		890.527	9.35195	4219.09	3.09	2564.77	1976.35	2215.12	2511.43	2623.68	4163.81	3815.04	4400.61	2507.75	2060.47	2051.27	3357.76	2823.38	2337.4	1417.24	1779.81	1671.44	4480.79	4185.86	3990.61	85039.2	2974.43	2815.63	2169.05	1915.54	2196.82		Unk.70
Unk.71	9.45_1037.4977m/z		1037.5	9.4482	3663.14	2.19	2032.13	2057.26	2120.05	1599.53	1700.53	705.251	1147.99	1014.86	627.313	614.652	670.34	1852.29	1827.31	1468.03	3398.94	3682.2	3908.3	3203.48	2920.09	2370.44	85039.2	1596.79	1734.64	2559.94	2109.44	2335.42		Unk.71
Unk.72	9.46_1724.1144m/z		1724.11	9.46195	37966.8	15.18	9294.75	7623.26	6557.32	10967.6	8841.09	2891.25	1302.26	341.627	418.119	429.7	281.322	3647.79	3277.06	6892.21	45361.7	39978.4	28560.4	14706	16117.4	22487.7	85039.2	5557.03	7301.68	11723.7	15183.2	16860.4		Unk.72
Unk.73	9.46_1709.0964n	1709.1	1708.09	9.46195	54256.1	9.33	13715.1	11666.1	10574.6	15318.1	13422.3	3333.17	1694.57	535.534	492.786	656.646	518.339	6548.63	5776.06	8882.08	61326.6	56791	44650.8	22978.6	23660.8	31172.3	85039.2	7478.96	10269.1	17570.2	22001.4	24664.2		Unk.73	M-H, M+Na-2H
Unk.74	9.46_992.4960m/z		992.496	9.46195	7228.04	1.4	6208.4	5194.01	5332.61	4603.34	4417.5	2394.64	2453.3	2454.24	1760.34	1899.99	2006.14	5113.1	5468.91	3339.44	5151.24	7243.48	9289.38	7283.33	7138.51	5529.12	85039.2	4483.19	3858.84	5979.66	5027.11	4950.23		Unk.74
Unk.75	9.46_935.5445n	935.545	970.514	9.46195	15848.7	2.65	10347.9	9523.49	9286.82	9086.42	8752.72	7790.34	10151.3	9024.8	5549.11	5263.89	5832.42	8690.47	8674.27	6748.89	13295.8	16544	17706.2	12812.4	13057.5	11495.6	85039.2	8997.75	8415.15	10969.3	9451.65	10046.9		Unk.75	M-H2O-H, M+Cl, M+FA-H
Unk.76	9.46_986.5395m/z		986.539	9.46195	12166.6	0.83	8469.61	7417.86	7612.68	6665.44	6588.11	3075.96	3743.13	3385.96	2486.13	2966.24	2880.16	7710.85	6831.76	5036.22	10303.6	12676.2	13520.1	10458.5	10468.5	9023.29	85039.2	6824.33	5635.17	9159.64	7781.42	7824.82		Unk.76
Unk.77	9.46_908.5230m/z		908.523	9.46195	3614.56	4.73	1675.61	2029.08	1978.74	1637.23	1777.01	973.568	832.567	1051.7	723.554	743.389	677.538	2028.19	2132.24	1524.49	2955.62	3875.53	4012.54	3130.23	3078.33	2439.33	85039.2	1954.86	1501.23	2863.26	2235.89	2478.58		Unk.77
Unk.78	9.46_1656.1276m/z		1656.13	9.46195	118660	4.98	21914.9	19577	17341	25853.3	24092.7	9572.35	6278.53	2570.26	1291.65	2195.13	1666.78	12042	9381.57	15592.8	152300	121616	82064.6	37503	38559.1	58543.2	85039.2	14231.3	19130.4	28538.5	36715	43149.3		Unk.78
Unk.79	9.46_918.5520m/z		918.552	9.46195	47283.5	0.29	27920	23877.7	24910	22824	22918.8	11972.7	13271.8	11812.5	8743.34	9315.55	9551.19	24273.3	24768.4	18460.3	44207.6	48144.7	49498.4	36298.6	35612.1	33177.8	85039.2	22544	20793.2	32424.9	26899	29569.1		Unk.79
Unk.80	9.46_903.5336n	903.534	902.526	9.46195	48603.9	0.04	30612.5	26165.6	26194.4	24560.9	24548.6	13136.2	13777.7	13246.7	9519.16	10709.2	10232.2	26601.4	26060	20090.2	44184.3	49814.8	51812.6	39081	37958.6	34497.5	85039.2	24570.3	22663.9	33658.9	29525.4	30967.9		Unk.80	M-H, M+Na-2H
Unk.81	9.46_1001.5016n	1001.5	1000.49	9.46195	20082	1.61	15901.9	13451.9	14160.1	12110.2	12388.3	7223.92	9596.85	8876	5963.75	6362.04	6371.41	13088.8	13819.8	9122.03	15478.4	19968.7	24798.9	18521.7	18833.9	14343.2	85039.2	12605.1	10913.1	17773.8	13966.6	14224.5		Unk.81	M-H, M+Na-2H
Unk.82	9.46_1066.4805m/z		1066.48	9.46195	3432.54	3.28	2628.44	1887.19	2064.84	1881.57	1796.18	937.028	1128.68	919.23	467.639	484.569	536.337	1954.94	1968.45	1425.07	2945.67	3514.47	3837.49	2751.81	2737.02	2443.55	85039.2	1785.08	1567.42	2532.15	2219.3	2431.2		Unk.82
Unk.83	9.57_878.5573m/z		878.557	9.57197	19503.2	0.24	10030.9	9027.18	8872.35	6880.04	6903.86	3329.63	3998.2	4164.08	14450.1	12029.7	11885.5	6873.55	6309.32	5788.34	3013.06	2200.41	2647.42	8955.47	7973.28	7504.94	85039.2	4018.81	4206.51	20515.4	18610.8	19383.4		Unk.83
Unk.84	9.57_960.4932m/z		960.493	9.57197	6632.01	7.38	3180.71	3631.16	3618.42	2736.34	2422.97	961.146	1143.52	899.676	4836.34	4058	3599.65	2996.73	2615.58	2065.22	1390.65	2111.72	2219.8	4423.57	3867.39	3058.4	85039.2	1605.66	1605.46	7444	5972.7	6479.32		Unk.84
Unk.85	9.57_946.5435m/z		946.543	9.57197	4977.18	5.69	2472.38	2306.27	2583.9	1683.24	1840.98	1159.55	1609.96	1783.9	4238.58	3113.23	3324.75	1642.98	1567.73	1406.61	321.819	280.932	404.189	2481.25	2573.25	1935.24	85039.2	698.774	828.884	5534.51	4671.76	4725.28		Unk.85
Unk.86	9.57_931.5273n	931.527	976.496	9.57197	18187.3	0.54	6237.33	6565.19	6882.66	6128.39	6082.17	13565.4	19587.6	21408.9	14398.3	13594	14115	5295.08	5909.43	4675.59	1930.01	2721.56	3160.54	4346.54	4226.25	3478.47	85039.2	4780.83	3922	6731.79	5547.52	5469.99		Unk.86	M-H, M+K-2H, M+FA-H
Unk.87	9.57_1555.1605n	1555.16	1592.13	9.57197	22194.9	4.05	6326.49	6204.98	5848.78	7153.34	6204.27	9564.45	9887.36	5672.45	23937.8	23080	19566.9	1808.58	461.595	3548.15	2198	1260.22	665.877	1897.65	2297.86	4356.9	85039.2	809.082	1893.22	13583.7	20824.8	25848.1		Unk.87	M+Na-2H, M+K-2H
Unk.88	9.59_878.5263m/z		878.526	9.58572	40527	1.65	7129.41	6973.72	6903.28	7143.74	7422.73	33515.9	43698.5	44366.7	24012.7	23218.5	22992.4	5036.57	5082.21	4295.02	2254.46	2704.42	2824	752.583	458.521	506.67	85039.2	6697.03	4969.38	828.27	1002.13	852.21		Unk.88
Unk.89	9.59_946.5157m/z		946.516	9.58572	9556.04	1.98	2276.88	2106	2088.59	2170.22	2231.92	7314.95	10530.2	10823	6546.95	6140.85	6421.07	1630.88	1622.13	1236.48	751.368	674.692	745.663	683.906	663.534	548.034	85039.2	2015.6	1555.99	1181.3	1206.08	1040.78		Unk.89
Unk.90	9.59_729.5728n	729.573	766.543	9.58572	32159.6	1.59	13035.9	10596	10825	10424.3	10192.3	30631.9	33009.8	32837.1	27441.1	25583.6	24224.6	7455.69	7687.51	7672.49	3217.18	3107	2755.35	6208.21	5979.87	5898.78	85039.2	6969.65	6594.81	14659.4	15127	16382.1		Unk.90	M+Na-2H, M+K-2H
Unk.91	9.60_962.5389m/z		962.539	9.59947	9764.76	1.76	1896.71	2039.22	1752.87	1897.66	1850.89	7178.03	10640	11476.3	6415.48	5767.43	6323.36	1143.52	1246.92	982.343	842.929	762.517	944.073	289.826	245.928	204.497	85039.2	1749.64	1543.1	48.8446	61.8077	91.9894		Unk.91
Unk.92	9.60_944.5672m/z		944.567	9.59947	9801.16	1.41	3891.62	3323.17	3360.12	3408.16	3476.85	970.435	1085.94	949.421	527.152	466.169	875.339	4818.73	4047.55	3305.79	9595	9480.29	10328.2	3813.79	4017.87	3559.97	85039.2	6750.7	7120.27	2974.86	2467.75	2546.78		Unk.92
Unk.93	9.60_928.5422m/z		928.542	9.59947	10206.2	4.69	3879.99	3453.27	3395.15	3306.8	3632.42	1000.98	1199.47	1197.46	853.247	909.211	936	4946.83	4277.39	3691.23	9770.9	9854.13	10993.6	3904.94	3806.1	3332.13	85039.2	7110.02	7596.22	2765.8	2269.25	2411.43		Unk.93
Unk.94	9.60_781.5895n	781.59	802.564	9.59947	93111.2	0.71	50337.4	43491.4	44500	42221.7	41797.1	39940.4	44031.2	42994.2	90400.7	91358.2	87395.2	30532.1	29711.8	28314	94295.6	100960	84078.3	28220.2	30417.5	26440.6	85039.2	51024.6	55161	35646.9	39726.8	38075.9		Unk.94	M+Na-2H, M+Cl
Unk.95	9.61_854.5260m/z		854.526	9.61322	5879.27	2.1	3138.91	2724.32	2804.06	2195.33	2371.46	1775.47	2153.64	2201.79	6059.11	5926.18	5382.06	908.881	926.895	888.735	5493.96	6395.86	5747.98	1381.11	1553.1	1099.43	85039.2	2555.54	2432.99	1963.2	1905.66	1714.02		Unk.95
Unk.96	9.64_932.5018m/z		932.502	9.64072	3242.98	2.2	1237.72	1194.67	1606.04	1492.18	1708.95	298.647	437.468	582.844	472.172	754.664	750.075	3156.62	3620.44	2951.87	1349.09	1568.59	1670.76	2410.13	2470.52	2364.37	85039.2	2620.3	1855.19	2182.35	2274.65	2370.8		Unk.96
Unk.97	9.65_984.5289n	984.529	983.522	9.65447	7555.76	1.94	1946.75	2288.68	2295.84	3009.36	2928.05	5148.38	6756.15	10762.8	3836.18	3449.97	3860.12	3485.59	2982.65	2887.88	1058.2	919.212	1209.96	5518.73	4385.59	4766.48	85039.2	2526.61	2251.66	2533.25	3009.15	2214.63		Unk.97	M-H, M+Na-2H
Unk.98	9.67_547.4989n	547.499	592.497	9.66822	17720.8	4.53	6104.4	8347.63	8294.24	6930.41	7594.66	3835.7	1833.06	1647.47	1937.83	1850.48	2025.94	6822.98	6753.61	8825.26	20745.2	17433.8	14983.4	10041.1	8906.92	10392.1	85039.2	9106.99	9186.78	7106.29	8999.97	11376.6		Unk.98	M-H, M+Cl, M+FA-H
Unk.99	9.71_904.5425m/z		904.543	9.70947	15372.5	0.58	4465.25	4690.5	4752.91	5164.56	4782.61	12468.5	17034.3	16614.5	9012.6	9090.08	9113.16	5035.42	5053.22	4080.69	2814.24	3207.13	3033.55	4078.63	3671.83	3514.05	85039.2	5847.64	5483.3	2229.77	1885.22	2260.76		Unk.99
Unk.100	9.71_920.5676m/z		920.568	9.70947	14672.4	3.41	4549.57	3921.24	4038.12	4573.77	4358.1	11240.2	16367.2	16409.7	8735.45	8090.37	8601.37	4655.31	4316.64	3510.67	2408.44	2898.67	2595.86	3475.99	3333.76	3059.67	85039.2	4867.96	5110.65	2118.17	1687.97	1993.96		Unk.100
Unk.101	9.79_1047.5452m/z		1047.55	9.79198	6207.34	1.8	2530.9	2226.93	2665.11	3006.75	2931.01	4034.59	4934.47	6615.23	6841.23	5769.1	6011.69	2424.95	2631.76	2363.15	2796.45	2516.57	3470.23	3820.56	4581.14	3661.53	85039.2	3151.02	2795.26	2998.49	3340.61	2478.54		Unk.101
Unk.102	9.79_1130.4940n	1130.49	1151.47	9.79198	6784.67	6.02	2585.57	3106.01	2823.69	3316.65	3045.76	3314.21	4728.22	6155.82	6935.59	6219.98	7198.44	2329.12	3088.93	2024.87	3040.83	2618.13	3672.66	4860.36	4879.49	3663.61	85039.2	3322.63	2852.17	3122.44	3642.06	2916.92		Unk.102	M-H, M+Na-2H
Unk.103	9.79_988.5464n	988.546	1009.54	9.79198	26850	0.88	9607.82	10473.8	11158.3	12815.5	12656.4	18509.7	20337.8	27408.5	27245.9	25914.4	27389.8	10379.7	10996.2	10362.5	16080.4	11355.3	13794.3	17006.7	17568.7	15966.5	85039.2	13274.1	12746.5	11704.5	14789.3	10818.9		Unk.103	M-H2O-H, M+Na-2H
Unk.104	9.79_1032.5266n	1032.53	1031.52	9.79198	27160.9	1.27	11669.7	11544	11377.2	13627.7	12956.3	17509.9	19642.7	26997.5	27833.3	26012	27637.2	10737.3	11926.5	9995.29	14353.4	11421.5	15135	18160.3	18219.3	15097.4	85039.2	13917	12811	12966	15196.7	11748.3		Unk.104	M-H2O-H, M-H, M+Na-2H
Unk.105	9.92_920.5673m/z		920.567	9.91573	12484.9	1.52	6798.68	6064.29	6308.61	6073.1	6205.43	10018.1	14524.9	12911.5	6971.2	6801.23	7288.04	5913.32	5388.09	4868.89	8181.16	9307.38	9718.17	7278	6928.4	6558.96	85039.2	6947.09	6205.36	5519.44	4663.72	5729.46		Unk.105
Unk.106	9.92_904.5426m/z		904.543	9.91573	13319.9	3.55	8080.67	6301.95	6522.18	6842.67	6500.59	10628	14957.2	14374.5	7205.8	7463.71	7735.31	6957.68	6540.58	5660.59	8176.31	9597.51	9581.93	8126.76	7787.77	7087.18	85039.2	7163.06	6223.7	7189.31	6531.61	7059.91		Unk.106
Unk.107	9.98_957.5418n	957.542	956.535	9.98448	14016.1	0.68	8380.88	7243.18	7533.07	5730.1	5785.48	1985.09	2109.12	1875.28	3289.06	3247.87	3461.55	8490.05	8198.24	5969.65	2989.72	2947.04	3451.71	7269.88	7098.35	5659.64	85039.2	4122.21	4105.99	15891.3	13355.9	12801		Unk.107	M-H, M+Na-2H
Unk.108	9.98_1659.1554n	1659.16	1696.15	9.98448	36686	8.53	5664.28	5753.39	4908.61	5832.35	5061.76	620.237	200.064	353.037	122.556	409.431	451.94	4771.67	3641.66	6444.1	4155.39	1733.33	1269.44	4129.25	4203.58	6216.56	85039.2	1492.18	2356.16	29170.5	40363.9	40523.6		Unk.108	M+Na-2H, M+K-2H
Unk.109	9.98_987.5213n	987.521	986.514	9.98448	15596.7	0.04	9610.49	8032.3	8406.32	6656.93	6661.02	2252.44	2053.78	2341.6	3764	3452.37	3554.6	9939.26	9833.4	6941.59	3115.29	3366.47	4279.46	8416.31	7832.03	6521.3	85039.2	5314.91	4583.66	17963.4	15063.4	13763.1		Unk.109	M-H, M+Na-2H
Unk.110	9.98_888.5470m/z		888.547	9.98448	36506	2.74	18052.9	16432.1	16288.1	13035	13549.4	4146.08	3989.25	3867.98	6935.64	7359.11	6778.72	17817.2	18657	15311.3	8746.26	7646.75	8624.21	16273.6	16120.3	14730.3	85039.2	10040.7	9570.28	37670.9	36833.8	35013.2		Unk.110
Unk.111	9.98_1628.1661m/z		1628.17	9.98448	55660.3	4.85	7591.93	7364.42	6898.56	7635.63	7030.72	632.245	98.9147	119.238	652.491	572.404	276.485	5655.11	5600.68	9352.9	5763.42	2783.23	2025.73	6984.87	6056	9263.75	85039.2	2458.54	3217.78	40523.9	61696.8	64760.1		Unk.111
Unk.112	10.00_972.5589m/z		972.559	9.99823	10011.5	4.77	6270.25	5780.96	5594.64	4131.1	4543.45	1799.73	1987.7	1722.77	2587.78	2545.86	2357.51	6376.57	6399.02	4716.11	2689.4	2921.08	2927.69	5613.89	5320.35	4371.5	85039.2	3418.67	3315.6	11850.8	9497.37	8686.19		Unk.112
Unk.113	10.00_1610.1198m/z		1610.12	9.99823	17563.3	12.12	3228.86	4733.02	3010.72	4286.12	3609.41	820.08	24.8171	0	93.4674	315.349	338.882	2116.7	2328.03	3789.76	5459.81	2473.19	2106.15	6183.6	4843.32	6483.84	85039.2	1477.54	1472.73	11999.9	18186.4	22503.6		Unk.113
Unk.114	10.01_917.5129n	917.513	916.506	10.012	7042.95	2.25	4419.52	5512.3	5312.76	4140.68	4274.62	2810.92	1715.49	1942.64	2313.19	2057.13	2491.59	4114.02	5791.89	3981.17	6002.97	5970.64	7097.35	7661.28	7273.36	5952.66	85039.2	4271.1	3070.96	6936.34	6596.29	7596.2		Unk.114	M-H, M+Na-2H
Unk.115	10.05_884.4768m/z		884.477	10.0532	2335.64	2.88	1225.03	1218.02	1161.86	1254.54	1118.38	825.821	1760.86	1732.7	1803.56	2171.01	2295.98	924.173	804.647	784.57	368.774	659.922	752.391	2547.8	2450.15	2008.96	85039.2	521.19	588.743	2091.26	1581.82	1869.3		Unk.115
Unk.116	10.05_946.5830m/z		946.583	10.0532	4449.34	1.53	2336.82	1974.39	2281.73	2483.82	2430.51	2557.73	3705.08	2779.1	4454.18	4247.1	4646.73	2473.33	2148.48	1900.22	3039.79	3342.7	3547.56	3249.39	2864	2849.63	85039.2	3707.14	3601.13	1641.87	1145.53	1301.47		Unk.116
Unk.117	10.05_930.5584m/z		930.558	10.0532	4758.79	2.35	2439.29	2528.49	2163.5	2962.03	2852.42	2719.61	3830.89	3745.19	4696.1	4667.57	4912.69	3272.76	4199.68	2731.42	4118.51	4024.43	4350.21	3282.33	3434.38	3324.43	85039.2	4586.79	4726.65	1737.44	1384.03	1578.85		Unk.117
Unk.118	10.14_864.5468m/z		864.547	10.1358	9396.81	3.43	2004.98	2437.79	2226.49	2334.8	2122.71	6329.69	9046.5	8369.8	10480.8	9058.32	8651.36	3357.91	3309.08	3143.94	154.862	132.219	132.809	326.783	180.904	272.5	85039.2	2140.1	1965.22	462.212	622.124	673.828		Unk.118
Unk.119	10.14_880.5734m/z		880.573	10.1358	9676.54	0.94	2310.05	2515.55	2490.9	2528.5	2495.02	6550.95	9319.06	8768.42	10680.4	9301.51	9047.68	3222.89	3758.99	3535.48	365.825	290.195	326.93	350.998	286.476	264.951	85039.2	2287.25	2322.31	491.896	652.961	521.892		Unk.119
Unk.120	10.15_751.5759n	751.576	788.527	10.1495	29628.2	0.3	17249.6	13383.7	14455.4	14552.2	14489.6	6448.62	8372.6	9027.43	5668.11	7052.6	4908.93	15687.5	12792.3	15681.5	18684.3	21630	20262.8	28662.1	29979.6	30242.8	85039.2	13094.5	15676	19252.9	18633.2	17188.8		Unk.120	M-H, M+Na-2H, M+K-2H
Unk.121	10.20_856.5415m/z		856.541	10.2045	14551.5	1.87	4555.53	4542.99	4172.89	4113.35	4223.64	3579.44	4251.55	4290.15	14969.7	14076.8	14608	2944.93	3023.95	3186.51	6279.11	6822.71	7105.22	1730.72	1778.88	1866.1	85039.2	4087.6	4232.08	2109.72	2180.79	2181.85		Unk.121
Unk.122	10.23_541.4318m/z		541.432	10.232	10681.7	4.92	1136.12	1143.28	1239.4	1070.26	1168.59	0	333.195	789.214	10111.1	10290.7	11643.4	1364.63	1611.3	1713	34.2854	6.76763	0	0	0	0	85039.2	1360.77	1541.85	0	0	0		Unk.122
Unk.123	10.23_906.5878m/z		906.588	10.232	4855.56	0.82	2840.66	2668.46	2782.14	2657.83	2627.23	2991.04	4678.43	3888.5	5298.06	4713.51	4555.12	3241.51	3148.1	2786.37	360.366	300.475	225.782	1757.72	1743.18	1938.06	85039.2	1853.64	2169.29	3930.87	4263.46	4496.89		Unk.123
Unk.124	10.33_930.5582m/z		930.558	10.3283	5011.78	1.16	1997.81	1898.3	1964.31	2208.29	2172.34	1303.31	1418.86	1086.3	243.194	354.638	280.617	5423.47	5140.18	4471.7	3218.6	4105.33	3572.44	2072.24	2118.41	2020.5	85039.2	3138.17	3500.76	2515	2084.69	2300.23		Unk.124
Unk.125	10.33_946.5831m/z		946.583	10.3283	4730.92	1.8	1941.74	1993.98	1892.67	2222.48	2166.62	1247.35	1372.99	1132.03	309.847	246.5	404.596	5077.96	4941.93	4172.86	3173.29	3897.29	3510.76	2226.77	2149.45	1939.44	85039.2	2696.86	3190.35	2147.72	1958.4	2218.34		Unk.125
Unk.126	10.40_536.5303n	536.53	581.529	10.397	6163.65	7	3792.9	4519.12	4957.56	3451.97	3956.41	4416.9	5649.35	6377.24	6467.03	5669.61	6354.3	6253.24	5900.39	3630.54	3553.94	4003.94	4546.88	5382.59	5338.41	4624.81	85039.2	4980.41	4635.52	5167.19	3852.32	4121.54		Unk.126	M+Cl, M+FA-H
Unk.127	10.44_889.5180n	889.518	910.493	10.4383	7653.56	0.43	3353.02	3121.6	3407.47	3361.81	3382.55	1929.2	3528.9	3969.32	1039.1	1554.15	1352.93	3616.99	2724.3	3083.2	2702.86	3031.98	3189.34	7942.54	8167.91	6850.23	85039.2	2904.95	2774.58	5247.75	5213.7	5103.09		Unk.127	M-H, M+Na-2H
Unk.128	10.44_956.5732m/z		956.573	10.4383	5898.76	0.78	1507.03	1535.36	1553.31	1485.66	1469.31	334.879	323.97	176.63	85.0238	125.879	126.226	1661.18	1896.76	1402.73	5451.62	6515.83	5728.83	1042.31	976.107	1198.45	85039.2	2426.42	2494.34	1082.39	831.939	911.369		Unk.128
Unk.129	10.44_972.5988m/z		972.599	10.4383	5799.18	3.78	1563.43	1456.17	1643.2	1450.6	1530.35	302.894	262.209	217.183	122.132	214.593	176.663	1937.77	1341.7	1223.12	5422.2	6693.31	5282.03	1106.41	1318.87	1156.09	85039.2	2298.57	2511.36	967.635	912.719	771.126		Unk.129
Unk.130	10.49_869.4890n	869.489	868.482	10.4933	27247.7	0.19	14978	16702.6	15939.7	12925.4	12960	10970.3	12616	12604.5	29244.9	24266	28232.1	15821.4	18399.9	12004	4792.05	5995.18	8105.59	22357.1	19222.1	14788.2	85039.2	9430.73	8035.98	23156	20836.8	23057.4		Unk.130	M-H, M+Na-2H
Unk.131	10.49_825.5090n	825.509	846.5	10.4933	21274.8	1.92	10100.4	12875.4	11694.9	9714.96	10084.1	9334.64	9654.76	9648.36	22263.7	19299.3	22261.3	11761.9	12873	9536.6	3984.85	4553	5481.68	17434.7	15010.8	12456.9	85039.2	6694.69	6603.11	18030.4	17589.3	20102.6		Unk.131	M-H2O-H, M+Na-2H
Unk.132	10.49_1499.0761n	1499.08	1498.07	10.4933	68701.2	5.59	17041.7	24500.7	19791.8	23120.6	21361.1	18448.8	11267.5	7400.98	62367	54203.6	69378.9	13025.4	13712.7	19087.3	5513.91	4599.43	4702.8	38564	30536.3	35458.8	85039.2	4501.17	5690.98	43206.4	68580.5	94316.8		Unk.132	M-H, M+Na-2H
Unk.133	10.49_937.4770n	937.477	936.47	10.4933	7426.58	8.03	3711.69	4487.47	4157.2	3028.72	3399.83	2430.43	2844.4	2733.18	8204.24	6207.87	7867.62	4243.51	4581.45	2790.5	1195.35	1423.47	1728.07	5667.46	5604.41	4047.13	85039.2	2391.76	1791.05	6467.61	5338.27	5673.09		Unk.133	M-H, M+Na-2H
Unk.134	10.49_952.4950m/z		952.495	10.4933	3698.08	2.54	1867.08	1994.99	1903.27	1612.56	1671.57	1426.25	2546.76	2443.04	4010.73	3074.63	4008.87	2155.32	2260.34	1788.96	506.148	675.049	850.81	2609.54	2571.38	1834.8	85039.2	1038.51	852.84	2827.03	2536.95	2751.96		Unk.134
Unk.135	10.49_964.4504m/z		964.45	10.4933	2660.9	0.1	1473.94	1628.68	1561.35	1238.92	1240.7	930.568	1028.75	992.842	2621.21	2335	3026.47	1403.11	1732.16	1223.7	835.579	896.861	1249.15	2193.97	1955.33	1556.72	85039.2	964.834	717.01	2514.54	2257.18	2256.39		Unk.135
Unk.136	10.51_1619.0250n	1619.02	1618.02	10.507	20846.5	9.91	5995.47	9204.68	6788.03	8006.22	6467.95	5124.58	2830.93	1158.76	21489.3	17424.5	22655.1	4460.74	4613	6085.15	933.761	1048.71	1139.63	14109.1	12019.6	11281.1	85039.2	787.803	1647.89	15287.4	20706.7	26545.3		Unk.136	M-H, M+Na-2H
Unk.137	10.51_989.4389n	989.439	988.432	10.507	8036.99	5.22	4916.63	5420.85	5016.59	3404.54	3721.63	2370.05	2919.69	3907.41	8843.4	6633.08	8634.5	5386.25	6393.94	3349.49	1010.74	1831.8	2555.33	6557.51	6409.65	3958.59	85039.2	2715.94	2352.18	7390.69	5568.13	5319.34		Unk.137	M-H, M+Na-2H
Unk.138	10.51_896.4633m/z		896.463	10.507	4409.77	0.44	2213.27	2290.38	2082.62	1953.62	1941.54	1387.03	1632.97	1746.79	4746.83	3901.43	4581.04	2111.61	2170.95	1786.45	723.078	769.908	1014.55	3247.36	2825.11	2141.11	85039.2	1123.49	913.071	3393.03	3529.15	3860.36		Unk.138
Unk.139	10.52_839.5716n	839.572	820.554	10.5208	54780.4	0.67	18201.3	23009.4	21993	20036.2	20226.5	33926.4	23557.1	30405.7	10160.8	10850.4	10057.5	14500.3	19435.1	19781	63603.3	46805.3	53932.6	10983.5	10404.6	9583.35	85039.2	37873	26244	6780.95	6891.76	8552.19		Unk.139	M-H2O-H, M-H
Unk.140	10.53_815.5716n	815.572	814.565	10.5345	6290.44	0.77	2622.23	3114.23	3699.59	3982.81	3939.49	4172.23	3250.62	3037.32	6483.59	6155.99	6231.74	4530.85	5153.56	6772.55	4651.96	3199.29	3545.85	3910.46	4290.46	4519.07	85039.2	6179.66	5425.74	3363.47	3699.57	4096.9		Unk.140	M-H2O-H, M-H
Unk.141	10.56_781.5892n	781.589	826.601	10.562	15485.5	3.03	6447.38	5745.65	6467.22	6203.44	6854.9	14441	16396.7	15618.8	14292.1	12861.7	12196.2	6433.72	6369.1	7269.27	8115.88	7958.35	7644.75	3387.06	3754.43	3891.51	85039.2	11179.3	10697.1	2040.25	2318.74	2383.71		Unk.141	M+Cl, M+FA-H
Unk.142	10.58_948.5989m/z		948.599	10.5758	4527.67	2.05	806.814	813.167	1068.84	1163.35	996.603	3320.32	5537.18	4725.51	2831.97	2946.98	2866.56	1472.24	1411.48	1037.53	508.663	469.734	374.977	234.518	187.176	300.99	85039.2	1426.97	1651.05	34.2258	25.5574	43.1274		Unk.142
Unk.143	10.60_873.5235n	873.523	894.498	10.6033	6329.07	2.48	3228.98	3743.09	3671.23	3408.23	3598.2	2738.2	2421.32	1831.22	3218.58	2879.46	3053.45	4651.72	5419.55	3746.82	1467.92	1506.61	1198.48	6891.09	6561.09	5535.03	85039.2	3973.42	3873.13	5789.46	5612.2	6307.08		Unk.143	M-H, M+Na-2H
Unk.144	10.80_892.5401n	892.54	937.538	10.7958	123869	8.2	25024.9	28934.4	29337.2	27539.3	30930.2	26066.1	201578	143964	39012.8	37836.7	23814.9	52277.1	74254	89346.9	25437.1	13696	4164.38	1604.26	876.535	962.226	85039.2	17753.5	14574.7	5537.34	8353.18	12484.9		Unk.144	M+Cl, M+FA-H
Unk.145	10.80_968.5250n	968.525	1003.52	10.7958	26869.7	3.09	5621.58	5322.95	5339.94	4829.3	6087.62	4969.36	46179.1	29460.7	6619.24	6801.06	3711.62	9484.52	13796.9	18374.5	5951.1	2579.04	706.303	182.874	226.645	153.413	85039.2	3143.51	2690.18	812.7	1332.33	2342.33		Unk.145	M+Na-2H, M+Cl
Unk.146	10.80_954.5276m/z		954.528	10.7958	9661.94	13.36	1631.33	1739.03	2096.52	1688.94	2090.33	1806.25	15814.4	11365.2	2923.05	2702.29	1681.92	4476.53	5619.48	6741.56	1448.24	700.595	205.645	3.47145	55.9272	0	85039.2	1257.07	860.677	143.271	355.978	859.991		Unk.146
Unk.147	10.85_543.4475m/z		543.447	10.8508	30762.4	2.62	4358.46	4280.09	4138.22	4275.87	4611.13	159.796	1507.81	3439.54	27775.3	30583.5	33928.4	7673.58	8358.9	8966.97	296.209	222.326	79.7829	0	0	9.05715	85039.2	5746.03	6181.72	0	0	0		Unk.147
Unk.148	10.85_1279.7233m/z		1279.72	10.8508	22924.2	0.61	6950.68	8393.11	7686.5	6768.71	5801.45	582.027	318.741	393.361	1681.7	1562.21	1395.96	566.995	1189.27	843.993	24058.3	20374.4	24340	5057.41	5571.82	4956.44	85039.2	2537.93	3131.84	13922.4	13938	13785		Unk.148
Unk.149	10.88_895.5050n	895.505	894.498	10.8783	16557.6	0.24	12381.2	13155.2	11765.4	9958.19	9924.21	7024.15	6826.47	6357.36	5049.76	5185.94	5591.46	7498.5	7859.37	5906.76	13973.5	16362.3	19336.9	19369.6	16938.4	12723.6	85039.2	6164	5270.73	16294.4	15270.4	16404.9		Unk.149	M-H, M+Na-2H
Unk.150	10.88_851.5249n	851.525	872.515	10.8783	13410.3	0.74	7404.14	9290.41	7981.43	7179.18	7074.59	3263.72	2969.03	2816.82	2496.01	2467.9	2502.59	4719.55	5194.94	4048.56	12361.2	13431.3	14438.3	13689.2	12260.9	10114.7	85039.2	4152.26	3973.57	12286	11953	13058.7		Unk.150	M-H2O-H, M+Na-2H
Unk.151	10.88_1014.4476m/z		1014.45	10.8783	3592.51	4.61	2660.44	2662.39	2454.21	2007.95	1781.75	894.41	579.569	586.874	569.297	548.729	723.138	1287.74	1586.7	1089.06	1971.01	3021.37	3943.69	4438.81	3757.89	2580.82	85039.2	1294.37	924.372	3778.85	3060.31	3404.44		Unk.151
Unk.152	10.88_941.4970n	941.497	922.479	10.8783	4962.24	4.97	3157.71	3402.82	3101.77	2692.2	2441.26	1200.18	830.482	517.629	399.727	329.965	597.36	1521.9	1696.01	1248.36	4370.22	5040.8	5475.7	5441.46	4797.83	3448.1	85039.2	1437.04	1162.84	4624.43	4454.58	5107.26		Unk.152	M-H2O-H, M+Na-2H
Unk.153	11.03_990.4480m/z		990.448	11.0295	5161.04	2.56	2516.51	2599.61	2349.29	1878.73	1811.85	3930.38	5195.93	6356.81	5272.99	4159.87	5160.03	1886.11	2253.73	1347.51	643.117	673.356	617.623	644.833	489.718	419.836	85039.2	1489.36	1070.88	388.477	321.184	429.349		Unk.153
Unk.154	11.03_917.4968n	917.497	938.486	11.0295	10816.3	0.2	2943.71	3528.56	2977.12	2790.45	2782.55	9792.94	10684.7	11971.2	8785.96	7368.8	8556.87	2726.92	3158.94	2338.96	756.294	467.737	915.782	518.242	276.856	347.268	85039.2	2113.09	1438.38	212.231	478.133	458.167		Unk.154	M-H2O-H, M+Na-2H
Unk.155	11.03_827.5246n	827.525	848.515	11.0295	27042.1	1.67	5805.45	7930.96	7218.41	6531.1	6378.64	26183.5	27224.5	27718.3	21025.5	17941.6	20159	5647.03	6855.64	5563.26	1859.29	1675.5	2014.07	1824.22	1303.22	1016.72	85039.2	5293.46	3826.19	1013.75	1001.57	1244.66		Unk.155	M-H2O-H, M+Na-2H
Unk.156	11.03_886.5237m/z		886.524	11.0295	12684.3	1.77	4067.42	4306.45	4206.27	3781.65	3688.12	11137.2	12570.6	14345.3	10585.2	9115.2	10818.9	3288.67	3997.82	2900.68	1917.61	1648.02	1895.49	1519.58	1405.26	1255.88	85039.2	3077.29	2280.5	971.801	1195.74	1438.82		Unk.156
Unk.157	11.03_871.5048n	871.505	870.498	11.0295	31062.5	1.98	9934.49	10913.1	10663.6	9225.69	8970.95	27321.9	30628	35237.7	26227.6	22682.5	26621.6	8375.15	11461.4	7560.75	2949.06	2842.42	3092.95	3003.02	2164.82	1896.1	85039.2	7229.14	5621.45	1906.99	2015.13	2564.91		Unk.157	M-H, M+Na-2H
Unk.158	11.11_875.5386n	875.539	896.516	11.112	12985.6	1.98	6203.73	7354.11	7068.63	6673.1	6930.17	12267.8	14050.4	12638.5	11209.8	10966.2	11409.4	6904.21	8243.37	6732.55	3936.81	3435.09	3584.45	8536.2	7356.24	6461.22	85039.2	7755.51	6813.14	6747.83	7458.57	7956.14		Unk.158	M-H, M+Na-2H
Unk.159	11.13_1330.7461n	1330.75	1329.74	11.1258	114872	1.18	63924.1	72197.7	65952.1	60138.1	61881.7	41394.2	40441.7	41073.6	39489.2	40560.8	39694	82153.7	90245.6	74662.4	54968.1	50588.8	48467.3	126541	110453	98335.3	85039.2	58150.2	52773.6	108319	113580	122718		Unk.159	M-H, M+Na-2H
Unk.160	11.26_564.5621n	564.562	609.56	11.2633	16616.8	6.95	10852	12124.5	13456.9	9646.91	11217.1	10786.7	14690.2	17290.3	17669.7	15381.1	16799.5	17529.2	16941.8	11654.5	9705.01	12059.2	13542.7	13334.7	14039.5	11844.5	85039.2	14584	14248.6	13880.8	10510.5	10638.5		Unk.160	M+Cl, M+FA-H
Unk.161	11.28_867.5334n	867.533	888.509	11.277	8913.96	1.44	4118.19	2631.26	3424.48	4233.88	4148.25	4170.66	5733.45	7801.48	9540.02	10364.5	6837.35	6273.11	4204.28	6431.18	2957.03	4350.88	4772.5	3309.36	4140.08	4063.95	85039.2	4097.13	4588.75	2748.6	2510.33	1582.13		Unk.161	M-H, M+Na-2H
Unk.162	11.30_826.5815m/z		826.582	11.3045	6559.6	4.16	1805.17	2085.04	2176.6	1425.49	1602.2	388.731	272.17	183.367	880.306	956.308	913.278	1249.46	1463.53	1409.37	306.513	239.813	117.497	1925.08	1726.12	1697.77	85039.2	1107.31	970.245	5733.53	6319.59	7625.68		Unk.162
Unk.163	11.40_912.5394m/z		912.539	11.4008	4943.02	0.56	1684.52	1836.09	1831.85	1580.92	1568.51	2378.93	2701.51	2489.58	267.571	469.207	587.98	682.722	1154.51	967.469	4424.87	4957.04	5447.13	693.855	356.816	566.314	85039.2	2191.02	1530.86	268.635	406.843	492.75		Unk.163
Unk.164	11.40_875.5384n	875.538	896.514	11.4008	19658.2	0.91	7285.22	7913.63	7119.13	6837.65	6926.01	9284.97	9556.82	9352.86	3015.91	3258.79	2758.33	4635.86	5557.58	4862.23	18562.3	18567.4	21845	3983.16	3166.51	3040.62	85039.2	10150.8	7957.17	2191.75	2449.41	3378.35		Unk.164	M-H, M+Na-2H
Unk.165	11.43_851.5388n	851.539	872.513	11.4283	8991.49	2.55	5713.89	6545.09	6100.17	5883.42	5675.05	5032.05	5192.11	3955.15	6717.67	6527.82	6941.44	6266.13	8696.89	5964.25	4371.88	3359.78	3303.28	8349.63	7885.46	6657.76	85039.2	6743.47	6577.1	7992.03	8777.16	10205.3		Unk.165	M-H, M+Na-2H
Unk.166	11.57_1331.7545m/z		1331.75	11.5658	20420.5	0.2	5238.69	7331.33	6664.96	5953.03	5970.04	16993.8	22351.7	21916.1	1054.85	1649.71	1202.18	3523.32	4711.61	3953.22	14080.7	12238.9	11954.7	972.848	1048.15	959.491	85039.2	11718.5	9475.83	484.426	909.102	1187.93		Unk.166
Unk.167	11.59_839.5387n	839.539	860.513	11.5933	9222.91	0.76	4933.57	5838.02	5385.99	5494.16	5435.62	4951.44	4098.51	4388.14	9336.82	8345.87	8355.58	7751.81	9005.57	6533.57	7731.27	5269.87	6351.02	5034.76	4779.16	3996.42	85039.2	9908.91	9107.66	3189.12	3494.52	4128.33		Unk.167	M-H, M+Na-2H
Unk.168	11.61_899.5577n	899.558	898.55	11.6071	16011.6	0.84	7168.28	8856.13	8167.64	8218	8120.78	13967.9	16458	17609	10803.4	9289.4	11052.7	11519.7	15214.9	12137.5	7331.83	7253.87	8693.21	6958.94	6615.94	5714.27	85039.2	10354.4	7798.74	5455.13	5584.32	6837.2		Unk.168	M-H, M+Na-2H
Unk.169	11.68_818.6321m/z		818.632	11.6758	6838.75	5.29	3399.71	2848.8	2756.26	2407.82	2595.13	2688.75	3013.96	2745.39	7657.85	6934.21	5924.19	2236.55	1714.23	2232.76	1194.81	1266.72	1005.32	2286.95	1954.43	2132.76	85039.2	1724.75	1895.75	4736.88	4986.37	5292.88		Unk.169
Unk.170	11.70_924.5685m/z		924.568	11.7033	23772.8	0.43	13934.1	18317.8	18202.2	16235.3	16334.2	21294.6	18659.4	22472.4	23942.1	21814.4	24762.3	20124	27789.3	23405.1	15425.4	13238	16581.7	16158.3	14324.8	12209.3	85039.2	22685.7	16261.2	19268.7	19384.5	22453.2		Unk.170
Unk.171	11.70_947.5574n	947.557	946.55	11.7033	39649.8	0.11	25205.1	30301.4	30458.6	25664.4	25623.9	30365.9	26404.9	36072.2	40846.1	36437.6	41665.7	33452.7	46088.5	33538.8	22165.9	20738.3	27145	27310.7	25726.7	20725.5	85039.2	35820.7	24891	33328.2	29992.1	34185.6		Unk.171	M-H2O-H, M-H, M+Na-2H
Unk.172	11.70_916.5703m/z		916.57	11.7033	12906.6	0.21	8923.57	9871.59	10205.6	8755.4	8781.52	10012.7	8632.34	11765.5	13182.3	11538.7	13549.1	11603.4	15469.8	11646.5	7421.89	7135.14	8744.23	8789.31	8818.29	7273.09	85039.2	12458.2	9481.49	11279.2	10490.1	11430.5		Unk.172
Unk.173	11.70_1045.5252n	1045.53	1066.5	11.7033	8076.91	1.32	5112.68	5924.35	6065.36	4949.22	5042.38	6277.84	5648.15	7514.5	7999.06	7598.42	8633.23	6972.86	9348.89	5778.38	4106.05	4163.41	5430.27	5285.58	5512.15	4113.96	85039.2	6841.22	4728.89	6969.27	6329.38	6493.33		Unk.173	M-H, M+Na-2H
Unk.174	11.72_990.5144m/z		990.514	11.7171	4780.43	3.56	3037.35	3348.81	3377.06	2727.93	2868.73	3252.43	3518.7	4175.35	5200.45	4114.9	5025.93	4164.51	5236.3	3119.76	2230.94	2266.45	3106.04	3085.2	2957.32	2268.24	85039.2	3978.72	2658.32	4053.77	3529.81	3497.9		Unk.174
Unk.175	11.72_739.5685m/z		739.569	11.7171	5373.95	3.09	3808.24	4222.06	3861.56	3736.39	3576.84	4727.66	3388.67	4583.28	5120.66	4902.3	5544.92	4405.98	6022.3	5693.59	3259.5	2767.62	3414.73	3280.15	3046.89	2586.89	85039.2	5114.38	3562.08	4055.94	4416.86	5244.51		Unk.175
Unk.176	11.88_869.5624m/z		869.562	11.8821	12372.5	3.23	3620.38	3081.78	3173.41	2968.84	3107.5	6670.16	17015.3	13431.9	4818.02	6867.95	6583.71	6356.01	3713.07	6971.56	6489.52	5063.69	1418.22	71.3926	47.1128	52.418	85039.2	571.693	585.014	621.306	1049.68	1351.93		Unk.176
Unk.177	11.98_943.5236n	943.524	942.516	11.9783	17495.8	1.4	12480.1	12493.3	12791.3	10217.3	10804.7	9912.45	11121.7	11246	18126.7	16247.5	18113.1	16447.3	17645.9	11529.6	10092.1	11258.3	13619.1	12129.3	12118.6	8625.18	85039.2	13169.4	10946.3	12995.5	11745.2	12467.8		Unk.177	M-H, M+Na-2H
Unk.178	11.98_831.5558n	831.556	852.547	11.9783	36787.5	0.57	21944	26246.3	24539.5	22172.8	22352.3	20583.7	20240.8	20112.4	38403.9	34450.6	37508	31293.8	34898.5	26572.7	27501.8	27220.4	30259.7	22338.5	21041.9	17083.1	85039.2	27268.4	23136.4	26221.7	26732	28690.2		Unk.178	M-H2O-H, M+Na-2H
Unk.179	11.98_995.4861n	995.486	994.479	11.9783	18956.8	0.1	14825.6	14098.5	13623.4	11366.4	11382.6	10291.8	12916.1	13517.3	20684.6	17544.2	18641.7	17492.2	20426.1	11014.4	8344.83	11712.2	15014.8	13474.2	13034.7	8994.98	85039.2	14429.1	11178.7	15136.1	12668.9	12489.3		Unk.179	M-H2O-H, M-H, M+Na-2H
Unk.180	11.98_881.5329n	881.533	902.51	11.9783	11077.9	1.94	7139.09	7421.01	7300.91	7131.45	6738.67	6464.61	5712.15	5437.52	11297.4	10663.2	11273.2	9621.03	10129	7853.63	7619.61	7703.26	8991.58	6440.26	5795.8	5004.85	85039.2	8315.49	6656.3	7531.43	7563.12	8528.35		Unk.180	M-H, M+Na-2H
Unk.181	11.99_875.5360n	875.536	874.529	11.9921	46345.3	0.07	32958.1	33379.1	32270.2	28846.1	28816.6	26425.3	27279.8	28655.2	48083.4	44577.6	46374.9	40586.5	47065.7	31369.3	28267.7	31810.7	37713.1	30321.9	28645	21828.2	85039.2	35412.6	29744.5	34323.9	32473.1	33686.8		Unk.181	M-H, M+Na-2H
Unk.182	11.99_1511.1699n	1511.17	1510.16	11.9921	121157	1.43	45783.5	64228.3	50362.3	62670.6	56806.5	55999.9	33154.3	21134.5	119255	121576	122641	53964.9	62015.8	80003.3	153082	98426.7	98592.1	36031.3	32326.5	35769.7	85039.2	47854.1	51618.5	51197.5	88491.5	108787		Unk.182	M-H, M+Na-2H
Unk.183	11.99_1631.1186n	1631.12	1630.11	11.9921	43807	3.3	19449.6	24380.9	20102.3	22563.3	20474.6	20350.9	14093.4	10636.5	44567.2	42139.1	44714.6	22651	23932.1	27038.2	37212.4	32770.2	36013.9	14510	13153.5	13732.9	85039.2	18396.4	19335.6	20849.1	30772.8	36079.4		Unk.183	M-H, M+Na-2H
Unk.184	11.99_899.5136m/z		899.514	11.9921	6814.05	1.87	4315.82	4472.75	4354.39	3890.99	3730.31	3719.62	3666.57	3407.21	7045.12	6638.04	6758.97	5466.02	6269.38	4422.63	4849.57	4844.08	5621.79	3895.94	3814.13	3273.67	85039.2	4063.84	3668.66	4354.21	4838.06	5318.95		Unk.184
Unk.185	11.99_958.5417m/z		958.542	11.9921	7880.42	4.08	5887.5	5441.15	5567.78	4551.36	5039.87	4390.54	4723.55	4260.45	8376.59	6948.54	8316.12	7676.83	7656.74	5010.63	4410.83	5120.59	5998.97	5393.75	4889.15	3977.76	85039.2	5385.13	5061.89	5974.7	5275.1	5730.69		Unk.185
Unk.186	11.99_1563.1830n	1563.18	1608.13	11.9921	26088.7	5.09	11762.6	13562.8	11446.7	13942	12387.6	12342	7800.88	4377.68	24556.4	26851.3	26858.4	12331	12680	16597.5	28336.6	21062.2	21930.3	8177.1	7494.06	8314.45	85039.2	10099.7	10517	11661.4	18701.2	23202.2		Unk.186	M+K-2H, M+FA-H
Unk.187	12.03_1656.1290m/z		1656.13	12.0333	7476.94	1.29	3253.77	4640.36	3288.32	4551.11	4263.84	2805.11	1252.35	342.706	5049.3	4993.53	5123.86	4469.06	5525.67	5969.55	6966.63	5062.27	5811.54	4078.41	2957.51	3809.38	85039.2	3724.94	4977.96	4890.72	7933.39	9606.72		Unk.187
Unk.188	12.03_1537.1857n	1537.19	1536.18	12.0333	36970.8	3.64	16927.4	21846.2	19020.8	23083.2	21924.2	13039.7	7211.27	3072.93	22588.9	24155.9	25650.6	21567.6	25706.7	33012.9	46874	27843.2	26396.3	19215	15857.7	18724.2	85039.2	22026.9	25989.8	21989.9	39389.6	49533		Unk.188	M-H, M+Na-2H
Unk.189	12.06_817.6467n	817.647	854.611	12.0608	51498.6	0.04	24658	26517.3	25357.1	23581.9	23596.8	17877.7	15067.3	16186.1	23819.4	22299.3	27633.8	29611.3	36892.7	31919.8	11333.3	8747.47	10027.5	36203	32234.9	28976.7	85039.2	28214.4	21443.3	46011.6	49366.9	59117.2		Unk.189	M+Cl, M+K-2H
Unk.190	12.06_901.5516n	901.552	900.544	12.0608	16301.1	0.28	12343	13128.8	12905.5	10908.6	10951.4	7381.62	8447.56	7174.02	11740.2	11059.6	11404.7	16636.5	19733	12533.7	9994.29	11141.1	11310.8	14156.5	13863	10875.8	85039.2	14843.9	13895.9	14498.7	14705.6	14741.5		Unk.190	M-H, M+Na-2H
Unk.191	12.06_878.5630m/z		878.563	12.0608	9286.51	0.3	5786.72	7205.56	6521.1	6560.35	6532.39	3819.99	4298.49	3300.36	5885.87	5838.41	6025.82	8674.06	10465.7	7831.03	6803.62	6360.69	6528.27	7994.15	7340.63	6679.17	85039.2	8328.47	7883.41	8833.89	9138.82	9886.82		Unk.191
Unk.192	12.06_916.5702m/z		916.57	12.0608	6706.19	0.81	5170.16	5271.61	5239.51	4657.29	4711.22	3139.81	3192.37	2913.16	5143	4948.09	5422.24	7080.08	7610.37	5428.11	4440.72	4701.17	5141.28	6214.11	6227.93	4960.75	85039.2	6422.78	5624.38	6793.71	6412.99	6613.24		Unk.192
Unk.193	12.06_969.5394n	969.539	968.532	12.0608	4374.39	9.37	2735.55	3572.91	3983.62	2457.12	3081.53	2074.36	1919.43	1534.71	3296.67	3178.92	3909.64	4800.92	4859.21	3463.04	2717.07	3031.84	2285.15	4125.94	3565.69	2685.45	85039.2	4038.56	3592.1	4278.25	3537.48	3706.97		Unk.193	M-H, M+Na-2H
Unk.194	12.06_1562.1943m/z		1562.19	12.0608	9557.78	7.94	3452.65	4046.89	3736.64	5294.62	4254.41	1778.69	779.605	100.938	2397.31	3055.17	2799.52	4472.37	5426.23	7499.57	8827.97	5183.95	3603.44	4107.73	3611.47	4964.47	85039.2	5513.79	6700.59	5923.72	10407.1	12342.5		Unk.194
Unk.195	12.06_985.5647n	985.565	1020.5	12.0608	6237.23	4.91	5099.59	5465.09	4976.27	3959.62	4322.65	3449.25	3279.1	2682.92	5268.83	4748.83	5724.8	6639.07	7505.17	4567.46	3591.25	4590.62	4806.01	5667.81	5414.8	4049.33	85039.2	5986.05	4379.99	6063.16	5150.72	5550.06		Unk.195	M-H, M+Cl
Unk.196	12.07_592.5933n	592.593	637.592	12.0746	13191.7	7.24	9079.47	9865.66	10674	7979.81	9025.63	8037.94	9894.68	11455.8	13771.1	11779.2	14024.8	13495.1	13487.4	10166.2	7941.65	9298.72	10573.5	10962.8	11119	9718.57	85039.2	11374.4	12088.6	10924.4	9405.13	9998.8		Unk.196	M+Cl, M+FA-H
Unk.197	12.21_867.5703n	867.57	888.545	12.2121	7900.13	1.57	3646.41	5186.23	4795.09	3969.85	4311.47	2365.09	1825.43	1620.6	5565.82	5395.81	5504.61	5207.75	5951.84	5687.24	9273.07	7330.14	7097.18	5374.33	4476.27	3786.55	85039.2	7200.79	6545.79	2994.33	3336.8	3707.2		Unk.197	M-H, M+Na-2H
Unk.198	12.47_944.5322m/z		944.532	12.4733	4102.59	1.3	1997.59	2174.52	2166.46	2342.37	2472.51	1787.24	1604.77	1330.59	1780.88	1464.93	1967.43	3905.44	4875.14	3527.18	3632.75	3724.39	3656.46	1926.6	1616.17	1715.52	85039.2	3804.21	3510.3	1778.84	1657.91	1683.63		Unk.198
Unk.199	12.49_855.5697n	855.57	876.544	12.4871	24704.8	1.46	13248.7	14481.6	13809.2	14569.4	14272.4	10783.2	10029.4	8640.76	10039.7	9022.23	11129.5	23138.6	28533.2	22442.5	22268.8	23585.3	23686.6	11907.3	10507.4	9442.32	85039.2	24022.9	22577	9505.09	10861.8	11158.8		Unk.199	M-H, M+Na-2H
Unk.200	12.49_996.4946m/z		996.495	12.4871	4438.65	0.56	2639.55	2701.33	2370.59	2653.23	2674.23	1969.85	2010.19	1309.04	1995.82	1736.54	2047.33	4337.36	5423.98	3554.6	3319.62	3956.23	4186.31	2220.67	2230.35	1458.95	85039.2	4495.44	3679.55	1994	1982.92	1867.26		Unk.200
Unk.201	12.57_881.5856n	881.586	902.56	12.5696	43461.1	2.16	35312.4	38607.5	36807.6	33033	34057.5	31887.7	32110.5	29862.4	35124.5	32739	39206.3	42282.6	50005.6	38095.1	40039.7	41075.4	45506.4	38806.5	38085.3	30768.6	85039.2	39787.6	36877.8	41058.2	42494.5	43555.8		Unk.201	M-H, M+Na-2H, M+Cl
Unk.202	12.57_1567.2321n	1567.23	1566.22	12.5696	45209.4	6.3	18519.5	27565.6	21043.4	28447.5	25739.4	26821.3	16563.3	9986.91	15500.7	15017.2	21362.7	21727.5	25944.4	36984.7	57687.6	38742	34534.8	24937.6	24571.9	27539.8	85039.2	19833.5	25535.1	30264.8	48841.9	56521.5		Unk.202	M-H, M+Na-2H
Unk.203	12.57_986.5734m/z		986.573	12.5696	5218.06	1.23	4619.83	4708.89	4539.98	3908.81	3977.15	3576.77	3734.02	3651.7	4406.37	3730.92	4965.63	5175.06	6414.43	4064.7	4419.83	4576.59	5272.94	4754.45	4779.96	3535.02	85039.2	4979.41	4495.18	5544.69	4955.94	4833.26		Unk.203
Unk.204	12.57_909.5642n	909.564	930.542	12.5696	6452.57	1.81	4784.94	5507.58	5521.63	4997.21	5127.13	4571.57	4385.11	3793.55	4850.71	4220.14	5528.85	6127.04	7572.84	5657.83	6182.09	6365.74	6646.64	5781.74	5205.43	4632.79	85039.2	6026.1	5666.11	6010.51	6119.42	6385.41		Unk.204	M-H, M+Na-2H
Unk.205	12.58_1023.5181n	1023.52	1022.51	12.5834	12273.3	2.46	10877.1	10901.1	10432.9	8665.31	9124.21	8285.11	9204.14	8870.9	11076.1	9246.71	11617.1	12249.6	14973.5	9596.91	8983.06	10578.3	12374.4	11327.7	10658	7774.03	85039.2	11642.7	10226.4	11817.8	10165.5	10142.2		Unk.205	M-H, M+Na-2H
Unk.206	12.58_935.5784n	935.578	970.548	12.5834	8405.64	4.01	6491.73	7680.11	7168.96	5736.25	6537.86	5864.06	6303.63	5342.41	6779.03	6156.28	7784.11	8100	10000.8	7116.09	7275.1	7990.47	8594.88	7713.32	7153.67	5934.48	85039.2	7702	7256.69	8259.56	7622.37	7966.07		Unk.206	M+Cl, M+FA-H
Unk.207	12.65_907.6019n	907.602	928.576	12.6521	7813.87	4.39	3511.96	4541.33	4350.28	4016.99	4473.57	4207.76	4489.76	2917.02	2913.86	2534.32	3309.71	5815.11	6721.72	5453.02	4619.58	4713.29	3768.63	5152.12	4890.53	4348.58	85039.2	7892.49	8246.03	4621.47	4329.8	4712.48		Unk.207	M-H, M+Na-2H
Unk.208	13.44_881.7519m/z		881.752	13.4359	2968.24	2.53	1069.05	839.61	1102.44	973.395	939.228	1465.23	4197.77	3241.7	1594.5	1199.62	854.214	143.152	30.2858	70.8516	371.054	760.348	834.323	496.972	659.511	601.169	85039.2	108.757	307.363	1896.91	1926.65	1668.04		Unk.208
Unk.209	13.72_919.7680m/z		919.768	13.7246	3032.27	4.97	2858.87	1964.29	2811.13	2257.66	2104.33	1675.6	2155.56	2190.16	1505.35	1046	684.341	1930.46	1141.57	1164.59	1743.21	2488.01	2965.97	2704.04	3183.27	2635.75	85039.2	1742.39	1779.48	3072.08	3229.06	2795.66		Unk.209
Unk.210	13.78_907.7678m/z		907.768	13.7796	9022.02	0.01	1336.89	1083.41	1490.57	1584.06	1584.27	6019.95	10235.9	10810.2	1062.36	921.482	443.319	340.309	239.255	283.942	19.5664	52.3397	89.2737	1034.33	1477.74	1186.06	85039.2	157.644	556.5	1869.51	1541.64	1326.05		Unk.210
Unk.211	14.04_909.7835m/z		909.783	14.0409	5196.72	9.77	1626.77	1230.75	1802.68	1567.87	1365.21	2862.41	6750.01	5977.73	5397.16	4053.42	2330.06	229.734	104.385	197.648	281.456	522.798	754.197	628.683	735.183	489.42	85039.2	232.865	534.185	2278.51	2231.15	1606.12		Unk.211
Unk.212	14.23_1692.9901n	1692.99	1737.94	14.2334	44872.3	3.59	19423.9	19013.2	17782.6	19260.1	20262.9	9273.99	14270.5	13944.7	8159.7	9823.66	12573.8	32892	38611.6	34351.8	15334.1	10061.8	11656.5	48942.6	46261.9	39412.6	85039.2	23201.8	20344.6	20964	20729.1	14075.1		Unk.212	M+K-2H, M+FA-H
Unk.213	15.25_1137.9260m/z		1137.93	15.2509	21785.7	0.59	4585.84	4332.93	4220.42	3051.87	3077.43	70.1097	26.9559	35.9039	1061.95	615.5	173.072	2963.33	721.081	1151.6	34332.8	20896	10128.2	0	28.0799	0	85039.2	1445.05	1325.94	0	1.8413	0		Unk.213
