# Supplementary material for: Lipidomics analysis of juveniles’ blue mussels (Mytilus edulis L. 1758), a key economic and ecological species
Source: PLoS One. 2020 Feb 21;15(2):e0223031. doi: 10.1371/journal.pone.0223031 (PMC7034892; doi:10.1371/journal.pone.0223031)
Supplement: S2 Data — Relative abundances were employed for lipidomics data, whilst absolute values were used for FA and lipid class. Correlation values were calculated via R statistical software (v 3.5). (CSV) [file pone.0223031.s014.csv]

	Spearman Rank correlation
Lipid	Live.weight	shell_lenght
TG.56.7.	0.882352941	0.789473684
TG.56.5.	0.91124871	0.772961816
TG.40.5.	0.940144479	0.764705882
TG.52.5.	0.909184727	0.762641899
TG.58.11.	0.913312693	0.760577915
X18.2n.6	0.888544892	0.756449948
TG.50.6.	0.927760578	0.754385965
X20.2n.6	0.902426553	0.753743002
TG.58.8.	0.923632611	0.752321981
TG.54.5.	0.876160991	0.752321981
TG.54.9.	0.929824561	0.750257998
TG.52.7.	0.913312693	0.742002064
X20.3n.3	0.746402242	0.735377098
TG.56.10.	0.915376677	0.719298246
PE.O.40.4..PE.P.40.3.	0.360165119	0.698658411
TG.54.6.	0.791537668	0.690402477
Total.n.3.PUFA	0.878224974	0.667698658
TG.58.10.	0.859649123	0.657378741
X18.3n.3	0.661506708	0.632610939
TG.52.6.	0.820433437	0.630546956
TG.56.9.	0.843137255	0.624355005
TG	0.855521156	0.622291022
PC.38.6.	0.46749226	0.605779154
TG.58.5.	0.839009288	0.599587203
X18.4n.3	0.713106295	0.59752322
PE.P.38.5.	0.659442724	0.59752322
X11.13_1330.7461n	0.492260062	0.591331269
Total.PUFA	0.872033024	0.589267286
X14.00	0.851393189	0.587203302
CAEP.36.3.	0.320949432	0.585139319
TG.60.10.b	0.812177503	0.570691434
X22.6n.3	0.595459236	0.55624355
X20.1n.9	0.665634675	0.5500516
CL.88.24.	0.37254902	0.529411765
PI.38.5.	0.779153767	0.525283798
Total.Neutral	0.803921569	0.51496388
TG.50.2.	0.585139319	0.504643963
X18.1n.7	0.803921569	0.481940144
X18.1n.9	0.622291022	0.471620227
TG.60.14.	0.799793602	0.459236326
X20.2.NMID	0.541795666	0.457172343
TG.60.13.	0.779153767	0.446852425
PC.O.38.6..PC.P.38.5.	0.353973168	0.430340557
Total.saturated	0.750257998	0.428276574
X16.00	0.708978328	0.389060888
PC.36.5.	0.545923633	0.333333333
X22.3.NMID	0.226006192	0.33126935
Total.monounsaturated	0.622291022	0.310629515
CAEP.34.2.b	0.605779154	0.259029928
Total.n.6.PUFA	0.609907121	0.24251806
TG.48.2.a	0.46749226	0.236326109
X20.1n.7	0.517027864	0.186790506
X20.5n.3	0.486068111	0.174406605
PC.O.36.5..PC.P.36.4.	0.145510836	0.166150671
X16.1n.7	0.490196078	0.137254902
CAEP.34.1.	0.310629515	0.133126935
X22.5n.6	0.188854489	0.1124871
X16.1n.9	0.403508772	0.095975232
X16.4	0.417956656	0.093911249
PI.40.6.	0.211558308	0.087719298
CAEP.35.3.	-0.223942208	0.077399381
PC.O.36.4..	0.199174407	0.005159959
PC	0.197110423	-0.046439628
CAEP.34.2.a	0.120743034	-0.058823529
PI	0.170278638	-0.073271414
X22.2.NMID	0.091847265	-0.073271414
PC.38.5.a	0.188854489	-0.077399381
X10.80_892.5401n	0.15995872	-0.089783282
X9.05_779.5739n	0.149638803	-0.102167183
CAEP.34.3.	-0.479876161	-0.147574819
PE	-0.001031992	-0.166150671
Chol	0.135190918	-0.184726522
X22.4n.6	0.085699547	-0.207537457
Total.Polar	-0.007223942	-0.217750258
PG.39.4.	0.056759546	-0.230134159
PE.P.36.4.	-0.025799794	-0.263157895
X24.1n.9	-0.143527953	-0.283866396
PC.36.4.	-0.052631579	-0.292053664
PE.38.5.b	-0.027863777	-0.302373581
PS.39.3.	-0.149638803	-0.349845201
LysoPC	-0.327818695	-0.404344195
X20.4n.6	-0.128998968	-0.434468524
PI.40.5.	-0.318885449	-0.488132095
PC.38.4.	-0.391124871	-0.576883385
CL.88.23.	-0.547987616	-0.595459236
PE.O.40.5..PE.P.40.4.	-0.335397317	-0.605779154
X8.86_1019.5664m.z	-0.752321981	-0.605779154
PE.P.40.5.	-0.655314757	-0.665634675
PC.38.5.b	-0.547987616	-0.723426213
